# Supplementary material
Source: publisher figshare collection journal article supplement (https://geolsoc.figshare.com/articles/dataset/_/3454805)
Supplement: Supplementary file 1 [file 1]

GE-1A

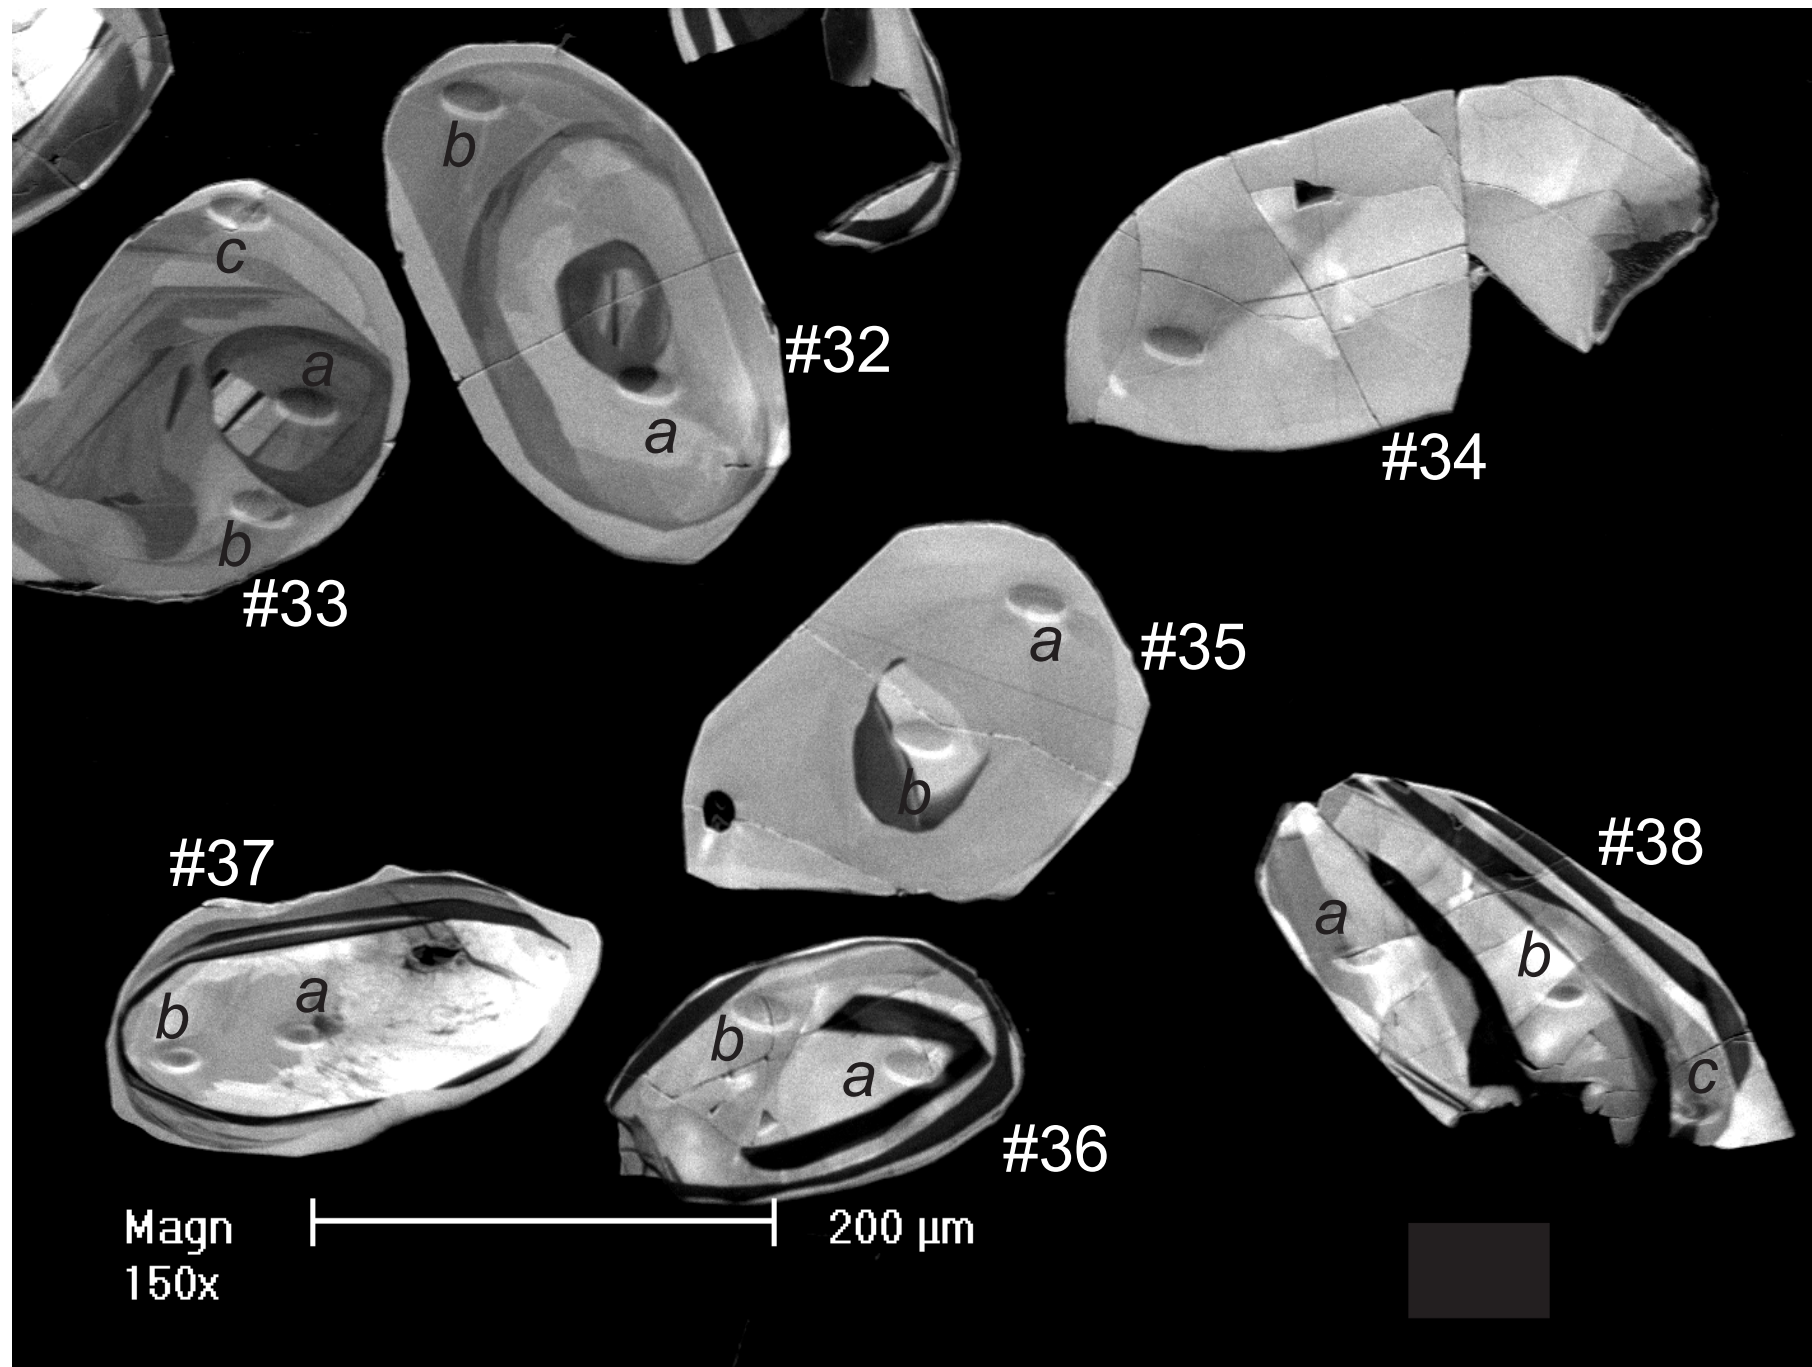

Figure S2 CL documentation of grains in Lew99-GE

GE-2A

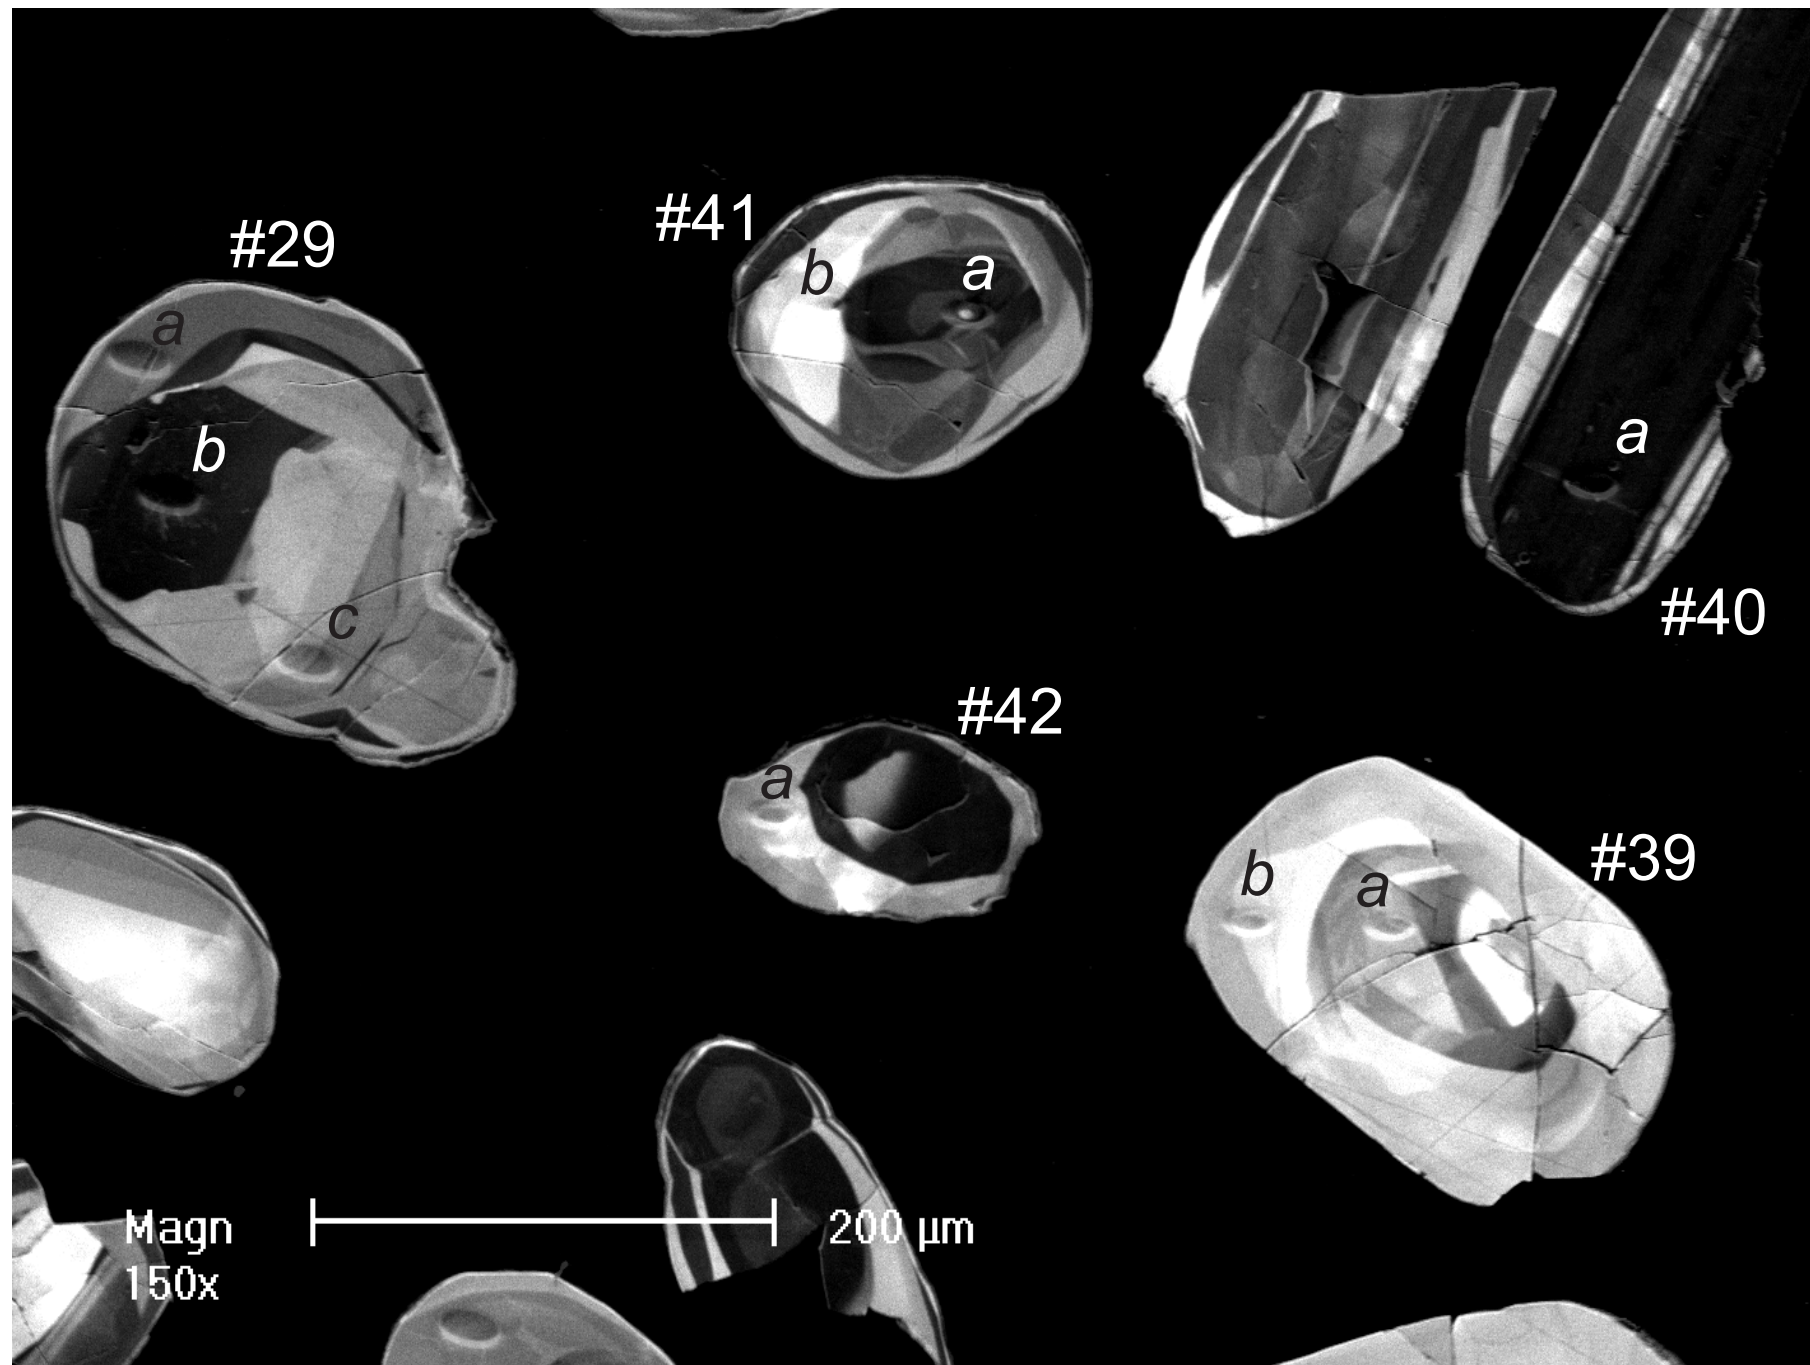

Figure S2 CL documentation of grains in Lew99-GE

GE-2B

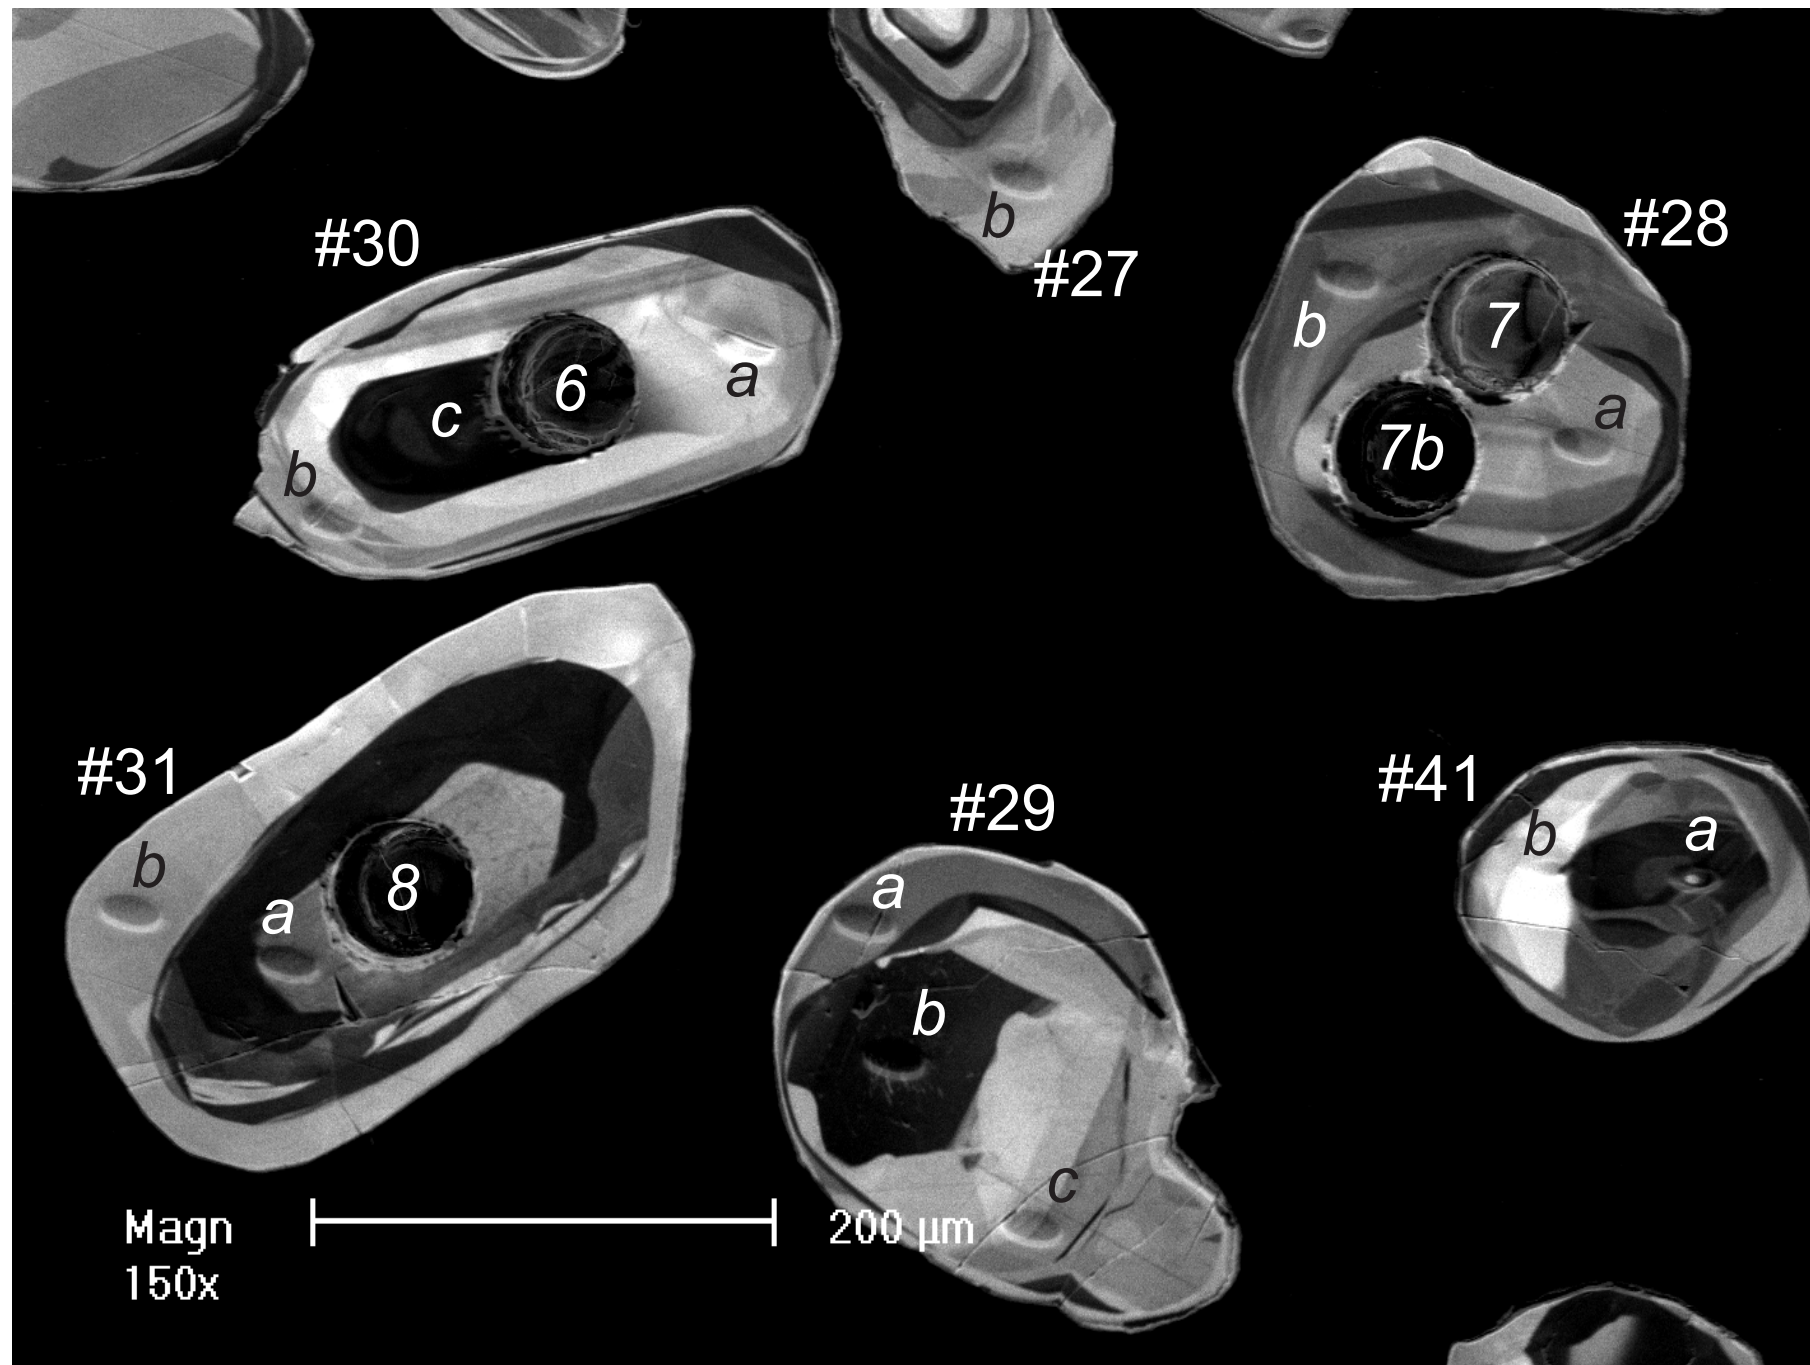

Figure S2 CL documentation of grains in Lew99-GE

GE-4A

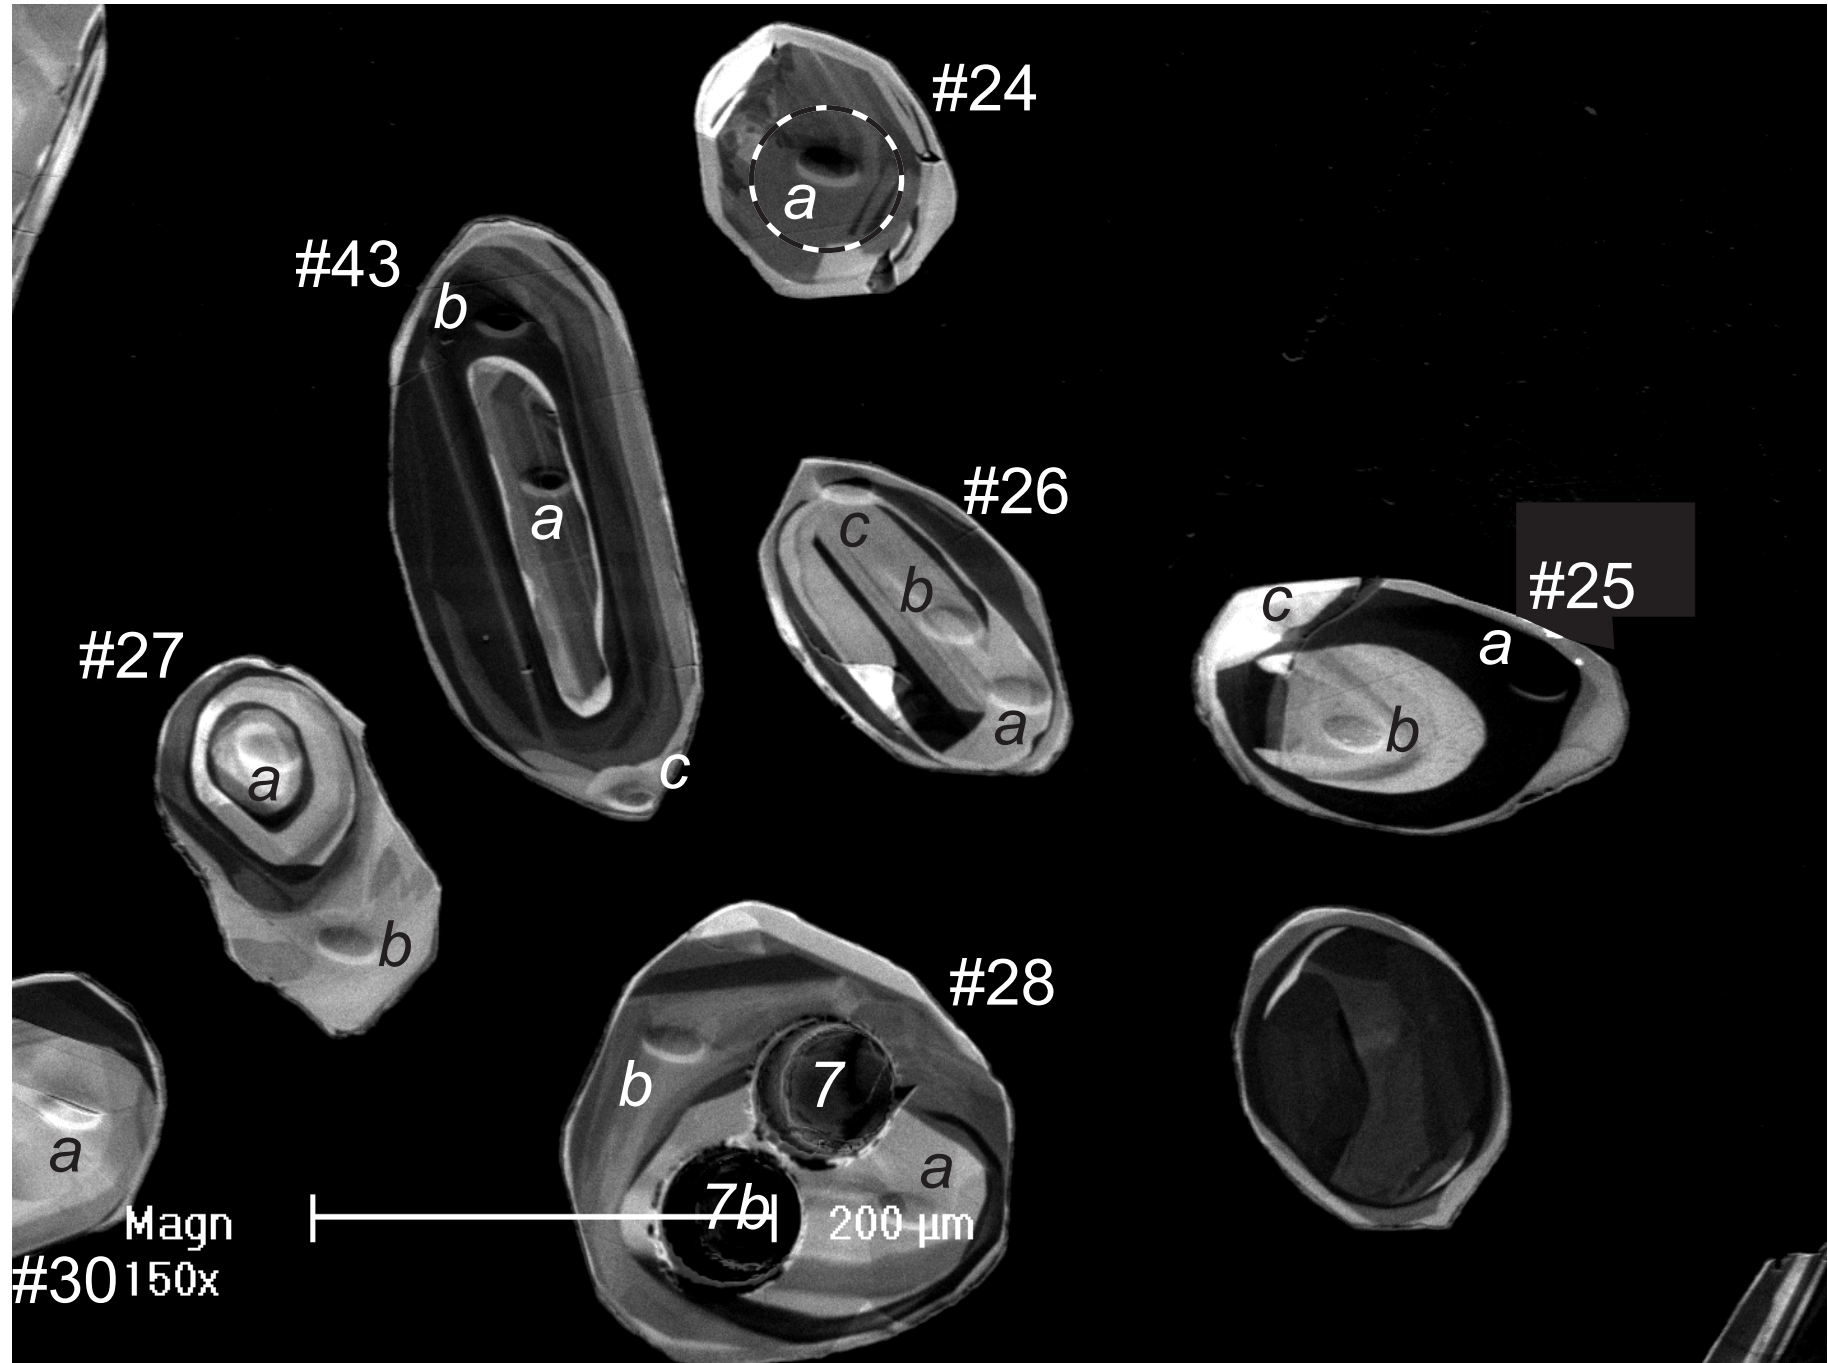

Figure S2 CL documentation of grains in Lew99-GE

GE-5A

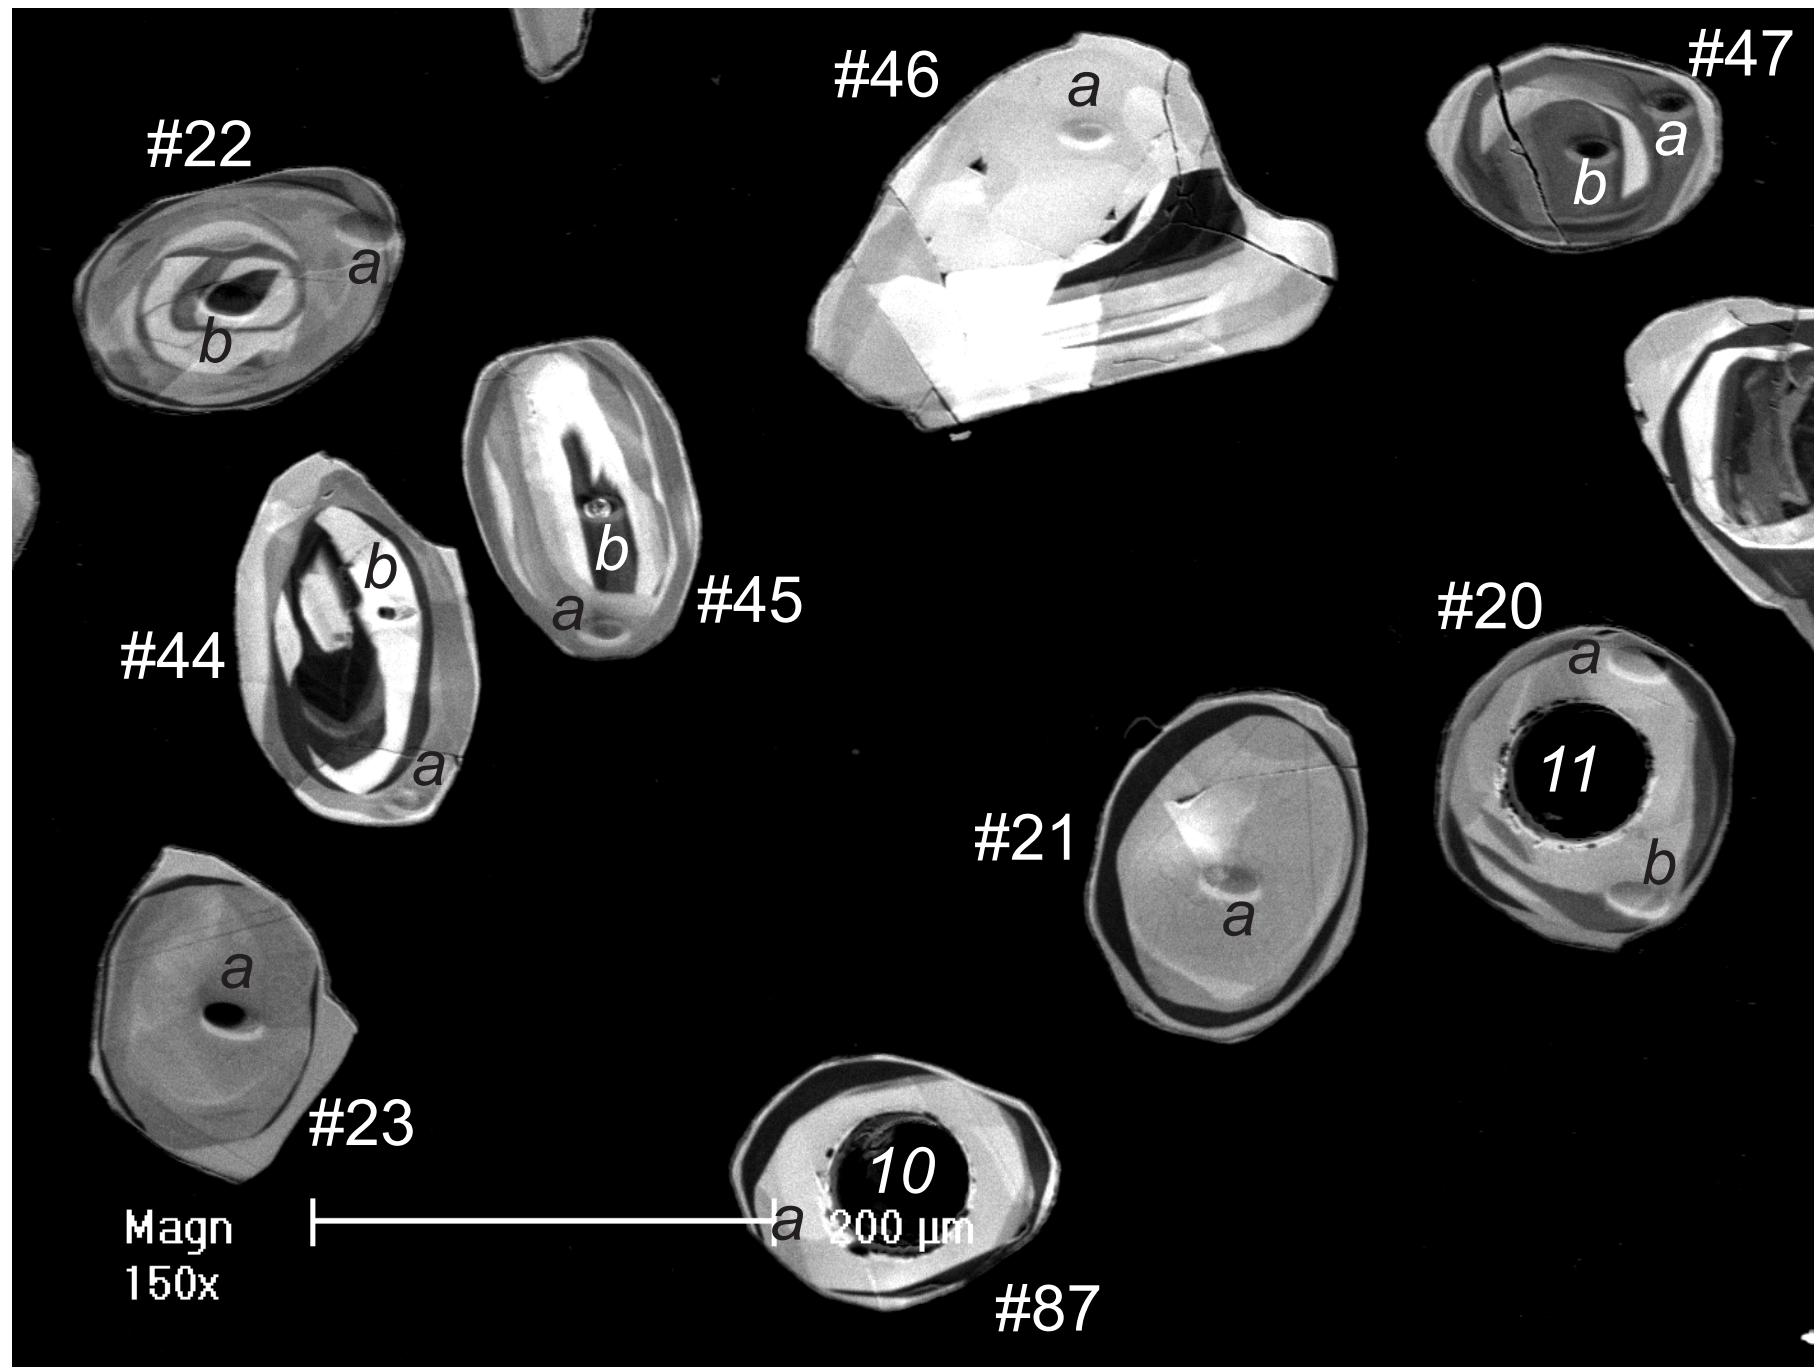

Figure S2 CL documentation of grains in Lew99-GE

GE-5B

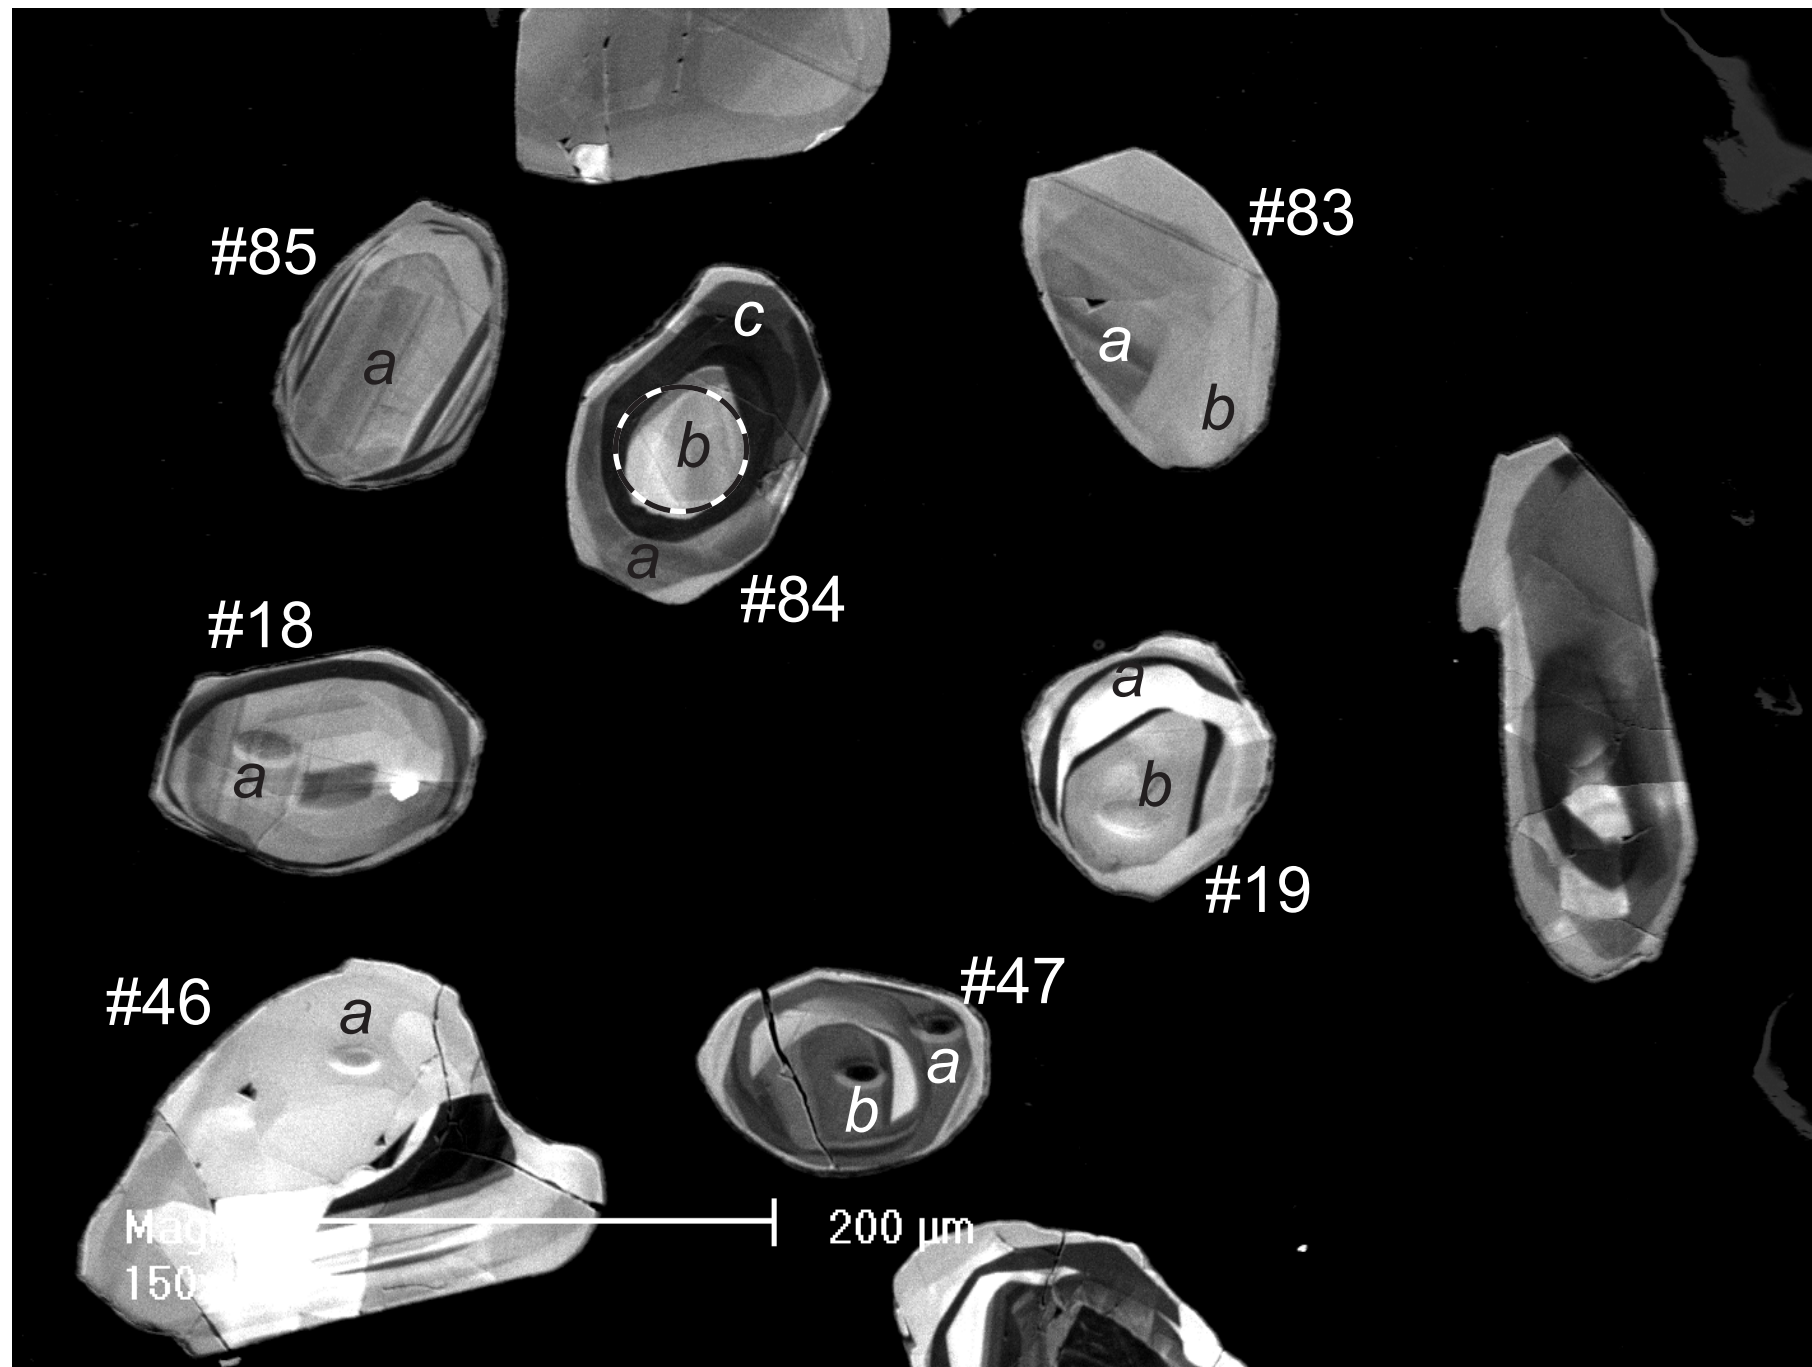

Figure S2 CL documentation of grains in Lew99-GE

GE-5C

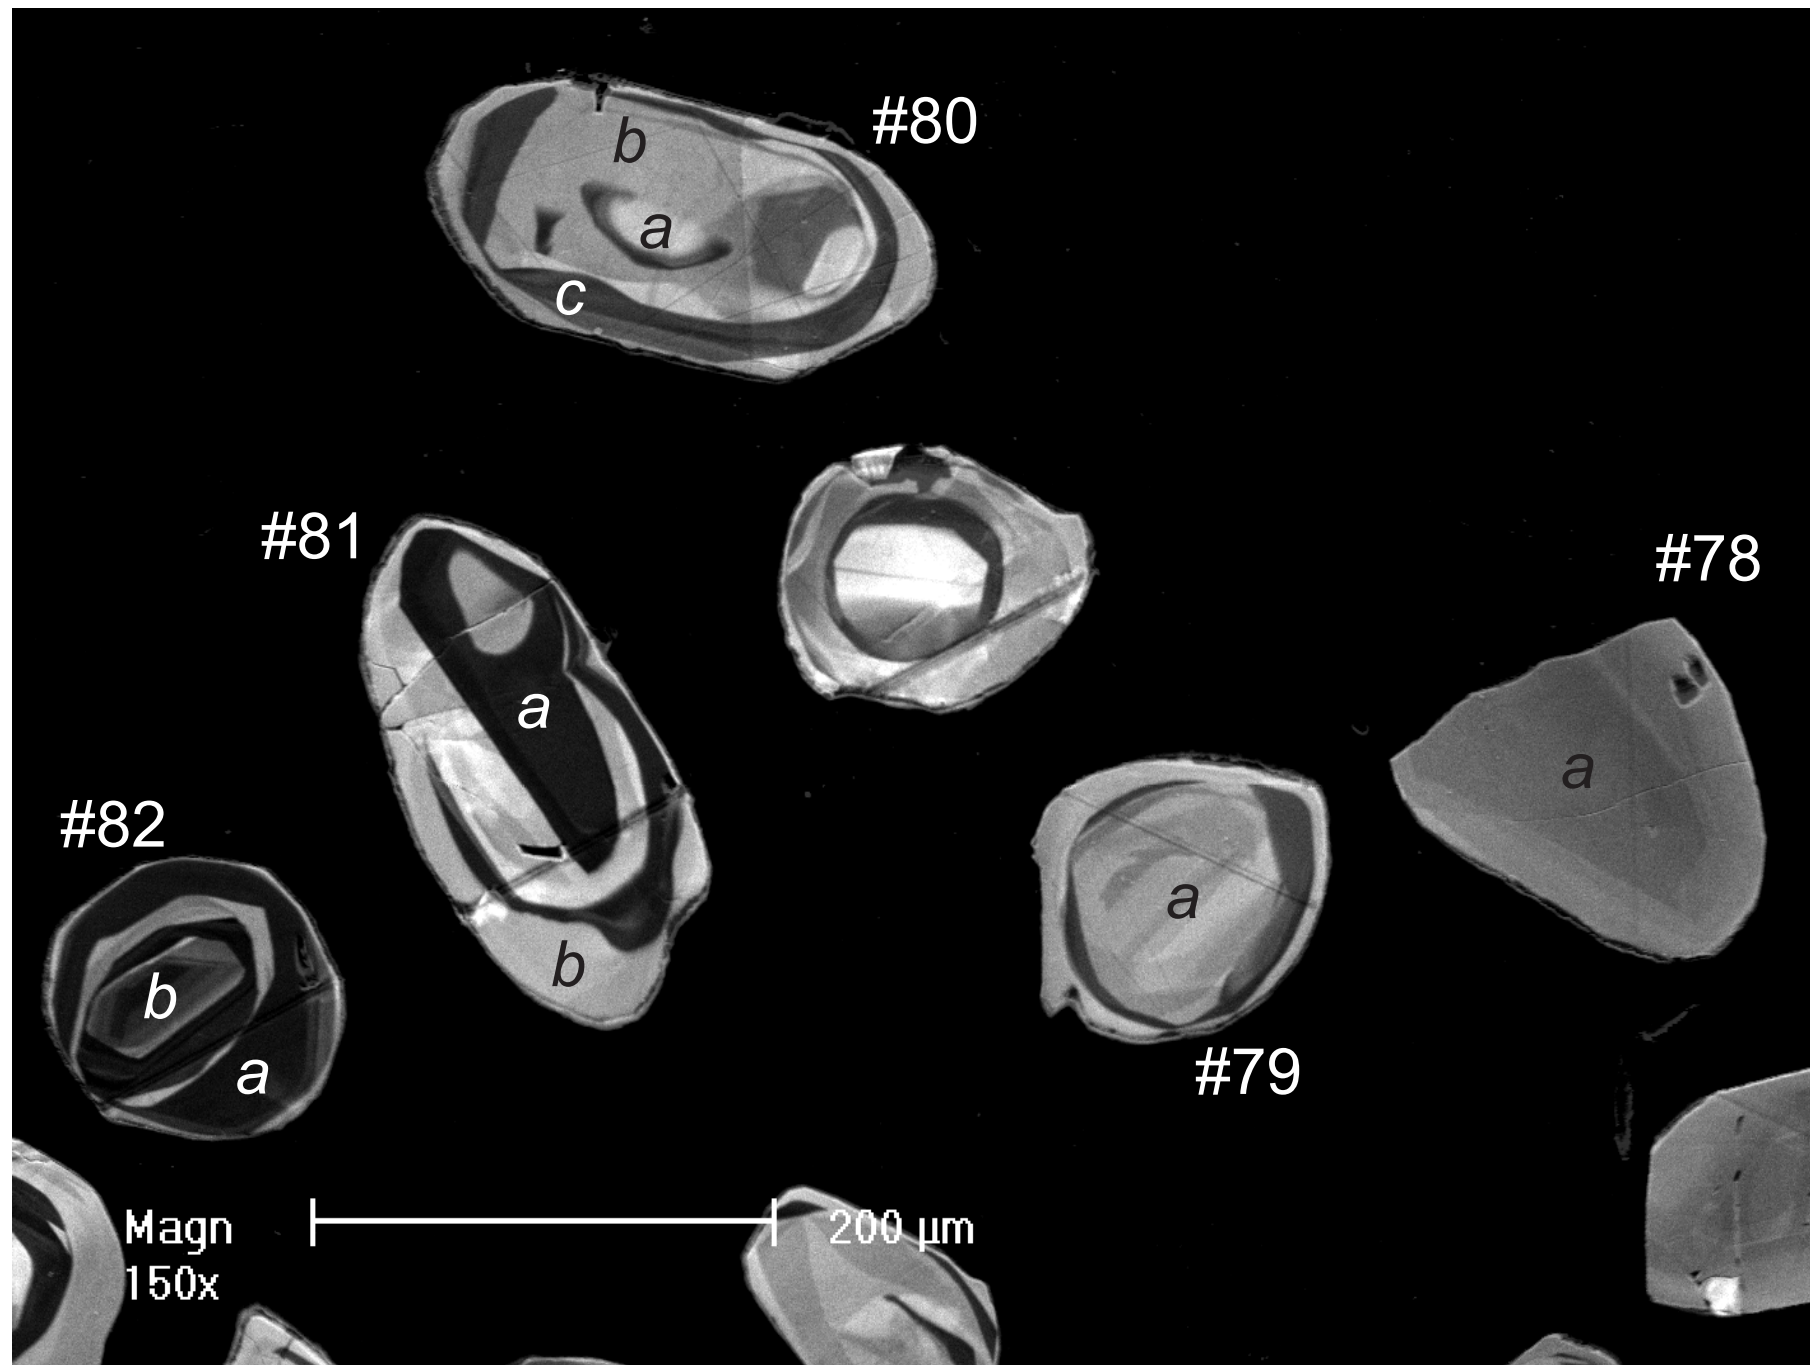

Figure S2 CL documentation of grains in Lew99-GE

GE-6A

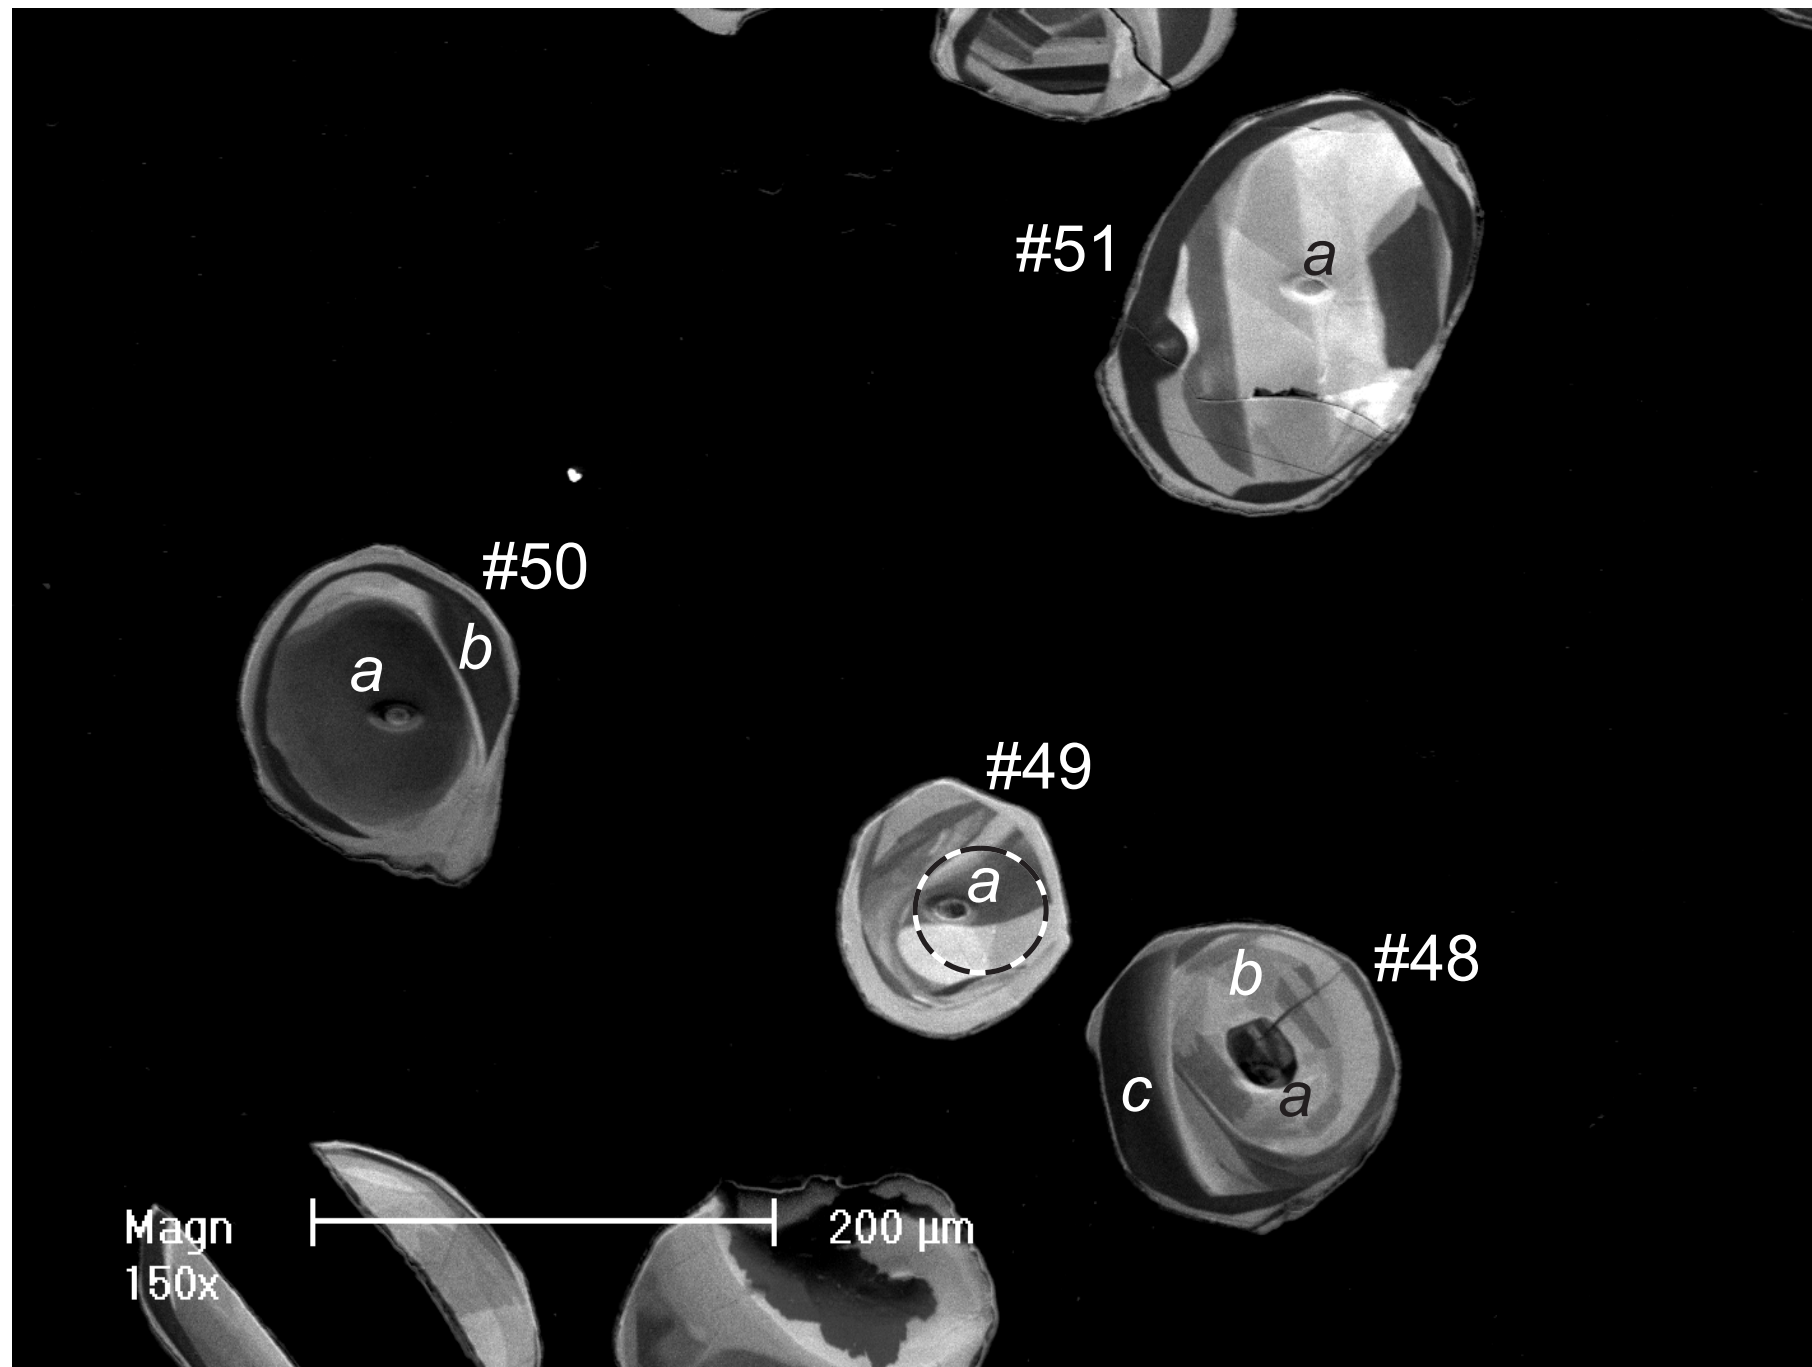

Figure S2 CL documentation of grains in Lew99-GE



GE-6B

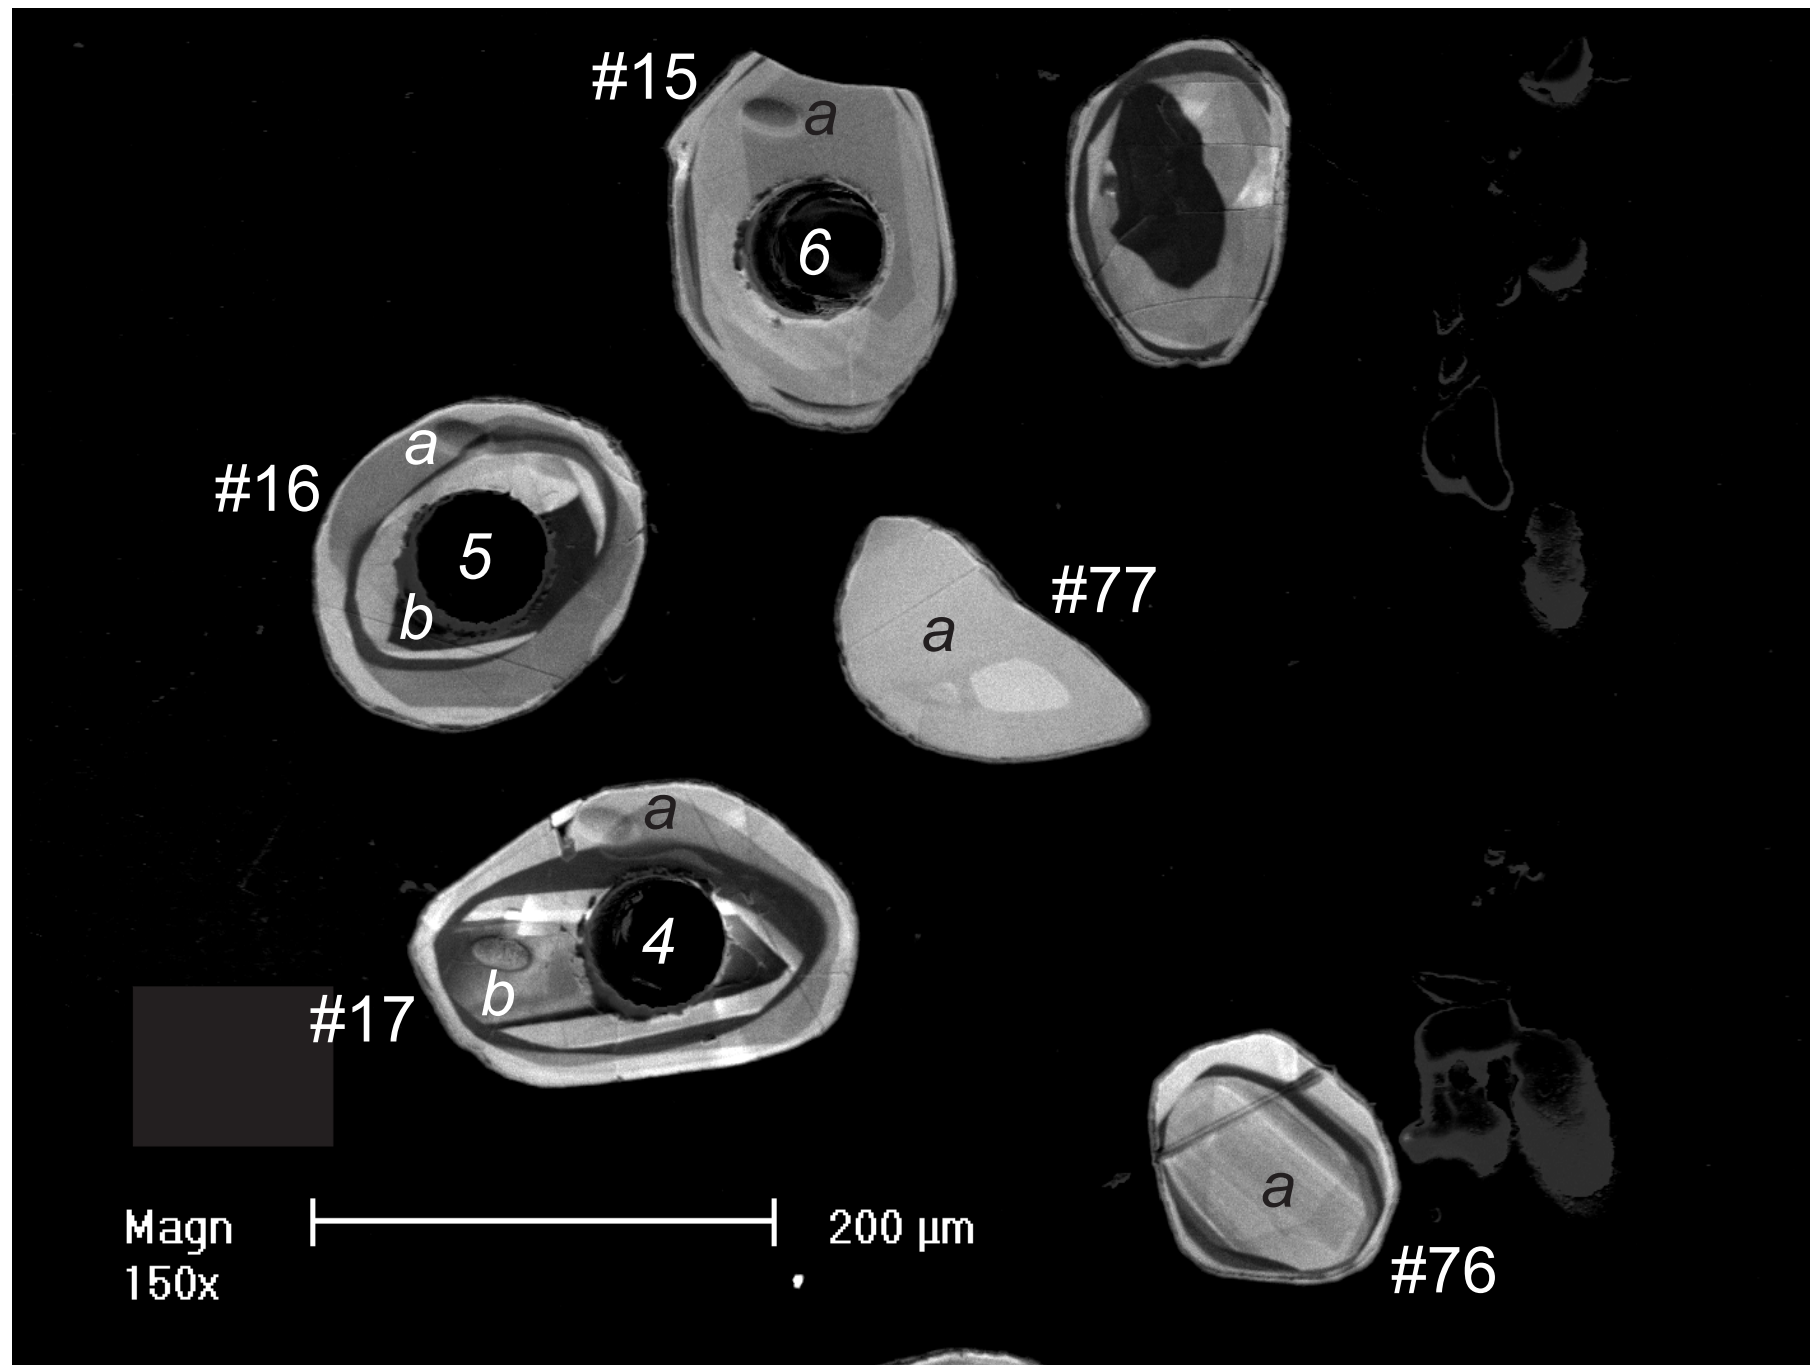

Figure S2 CL documentation of grains in Lew99-GE

GE-6C

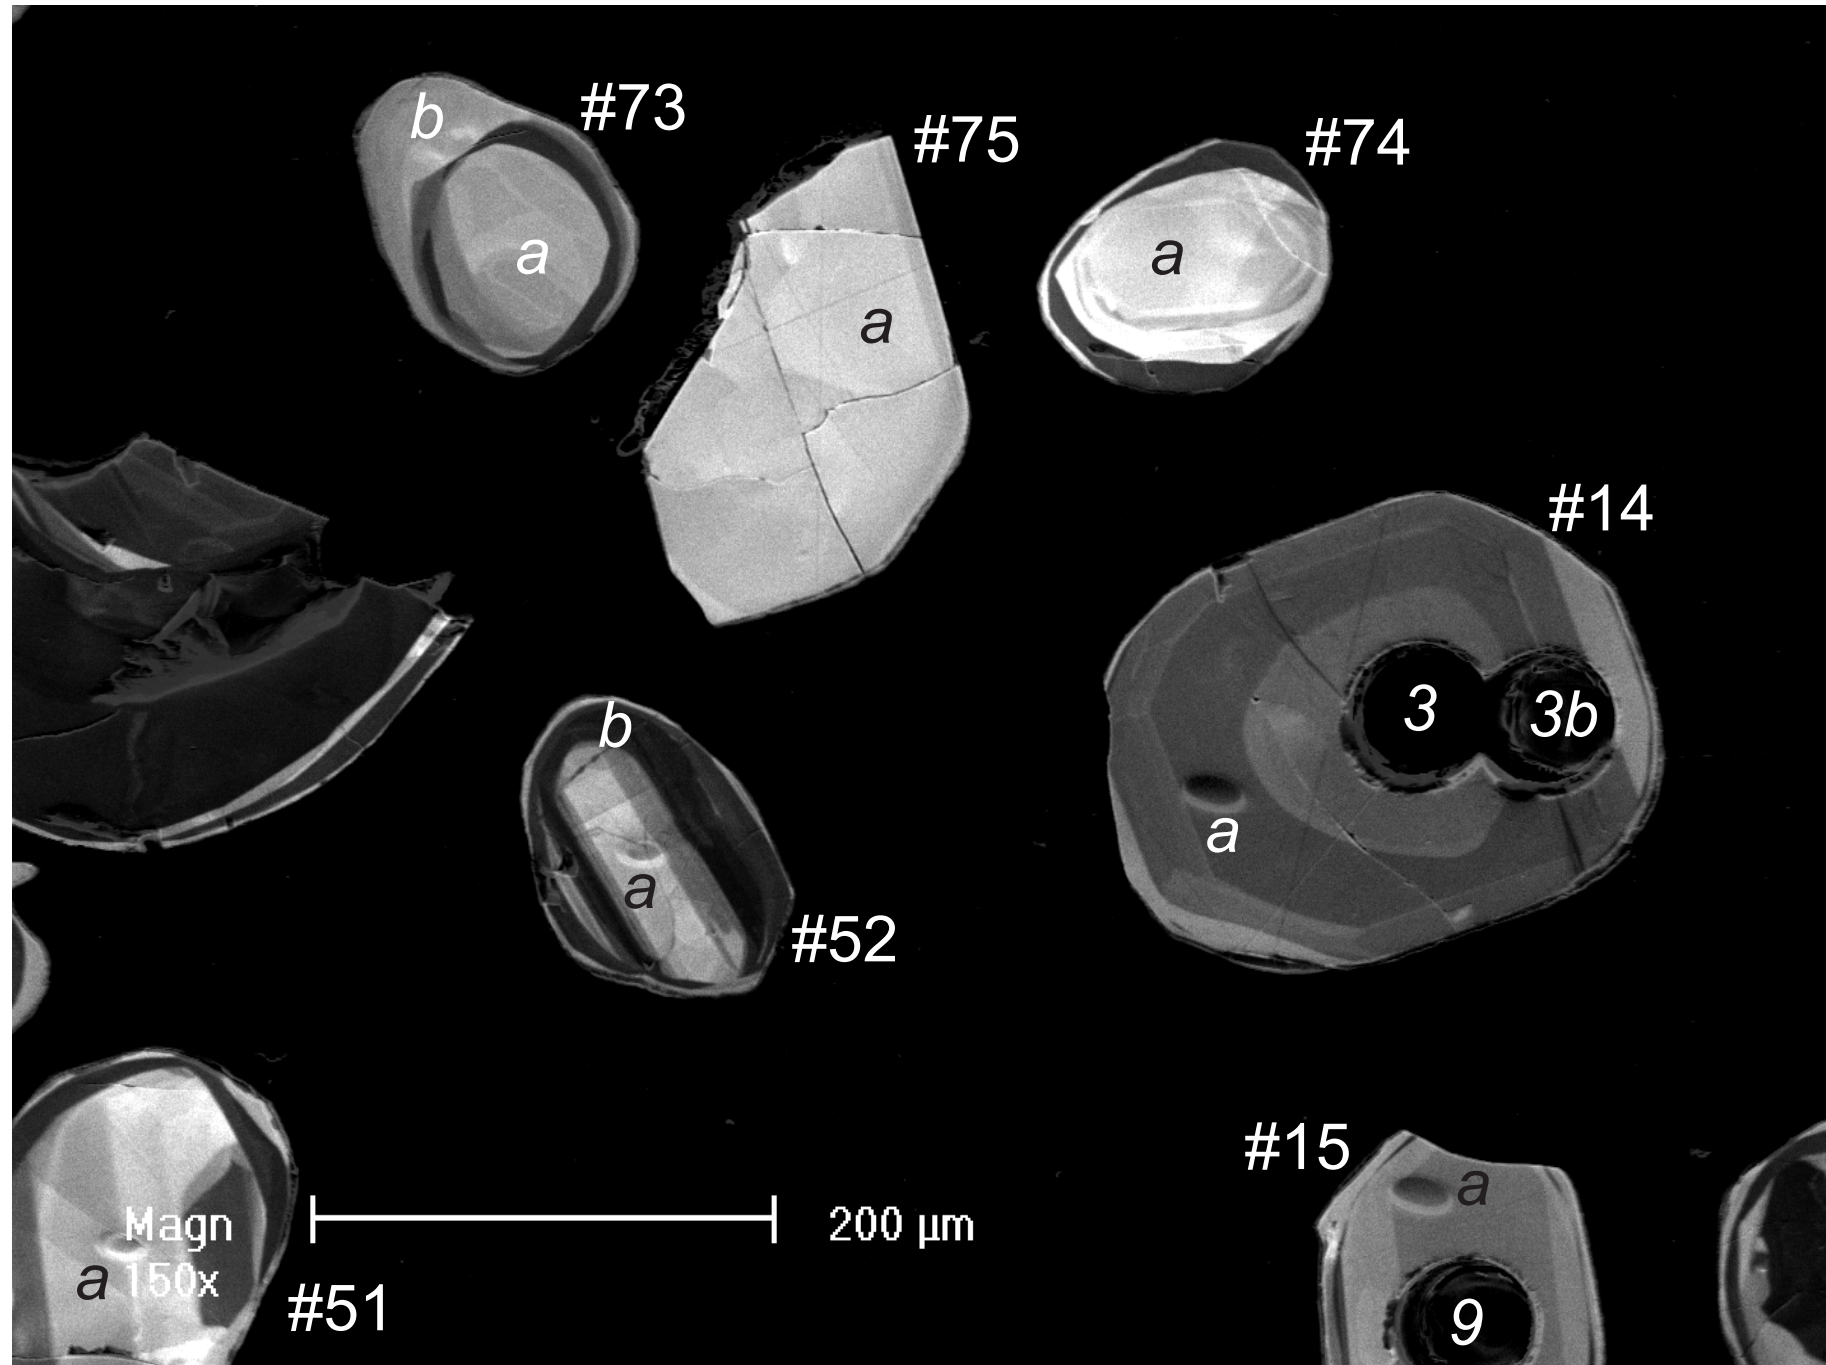

Figure S2 CL documentation of grains in Lew99-GE

GE-6D

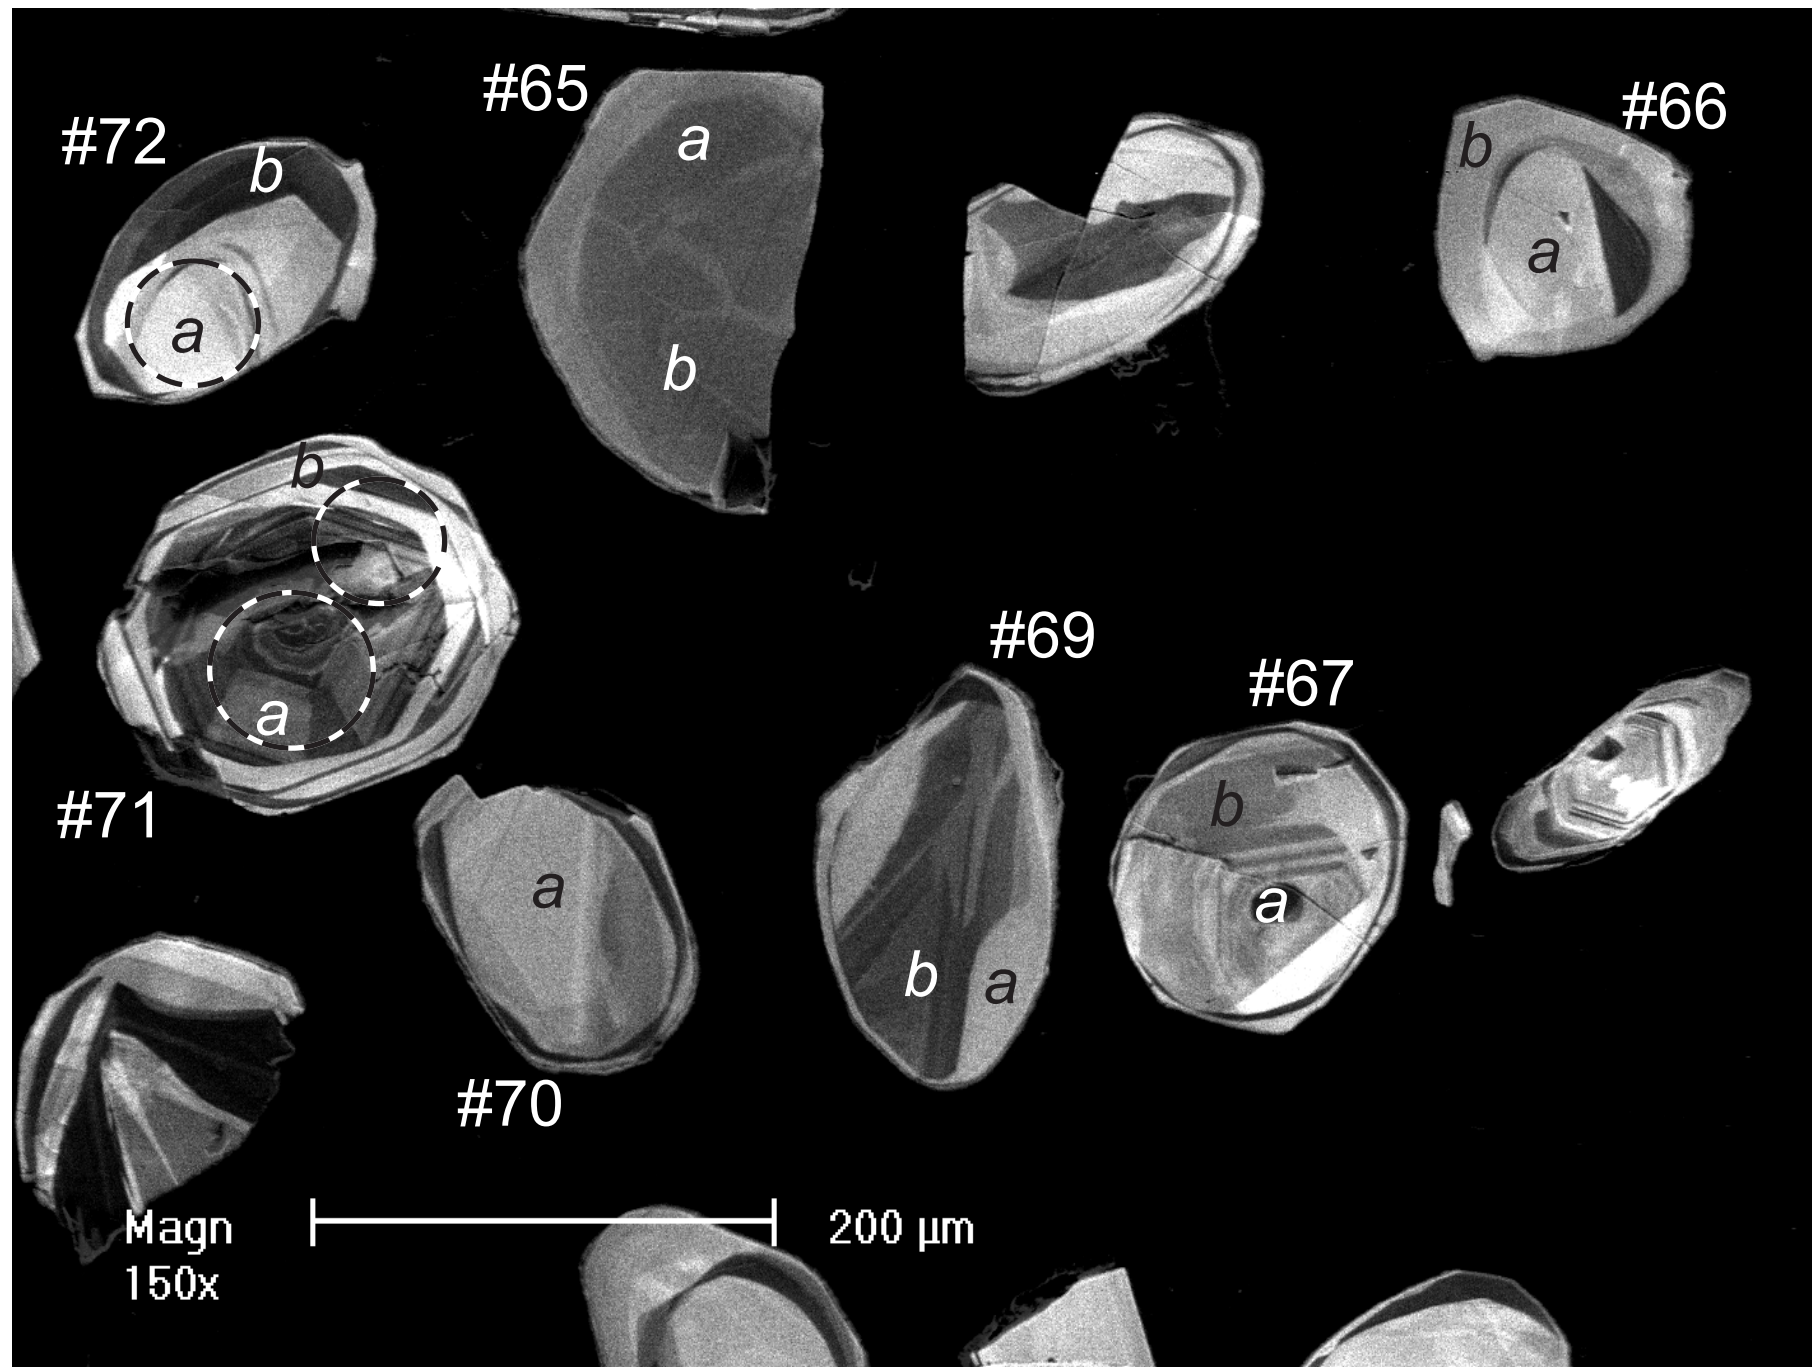

Figure S2 CL documentation of grains in Lew99-GE

GE-7A

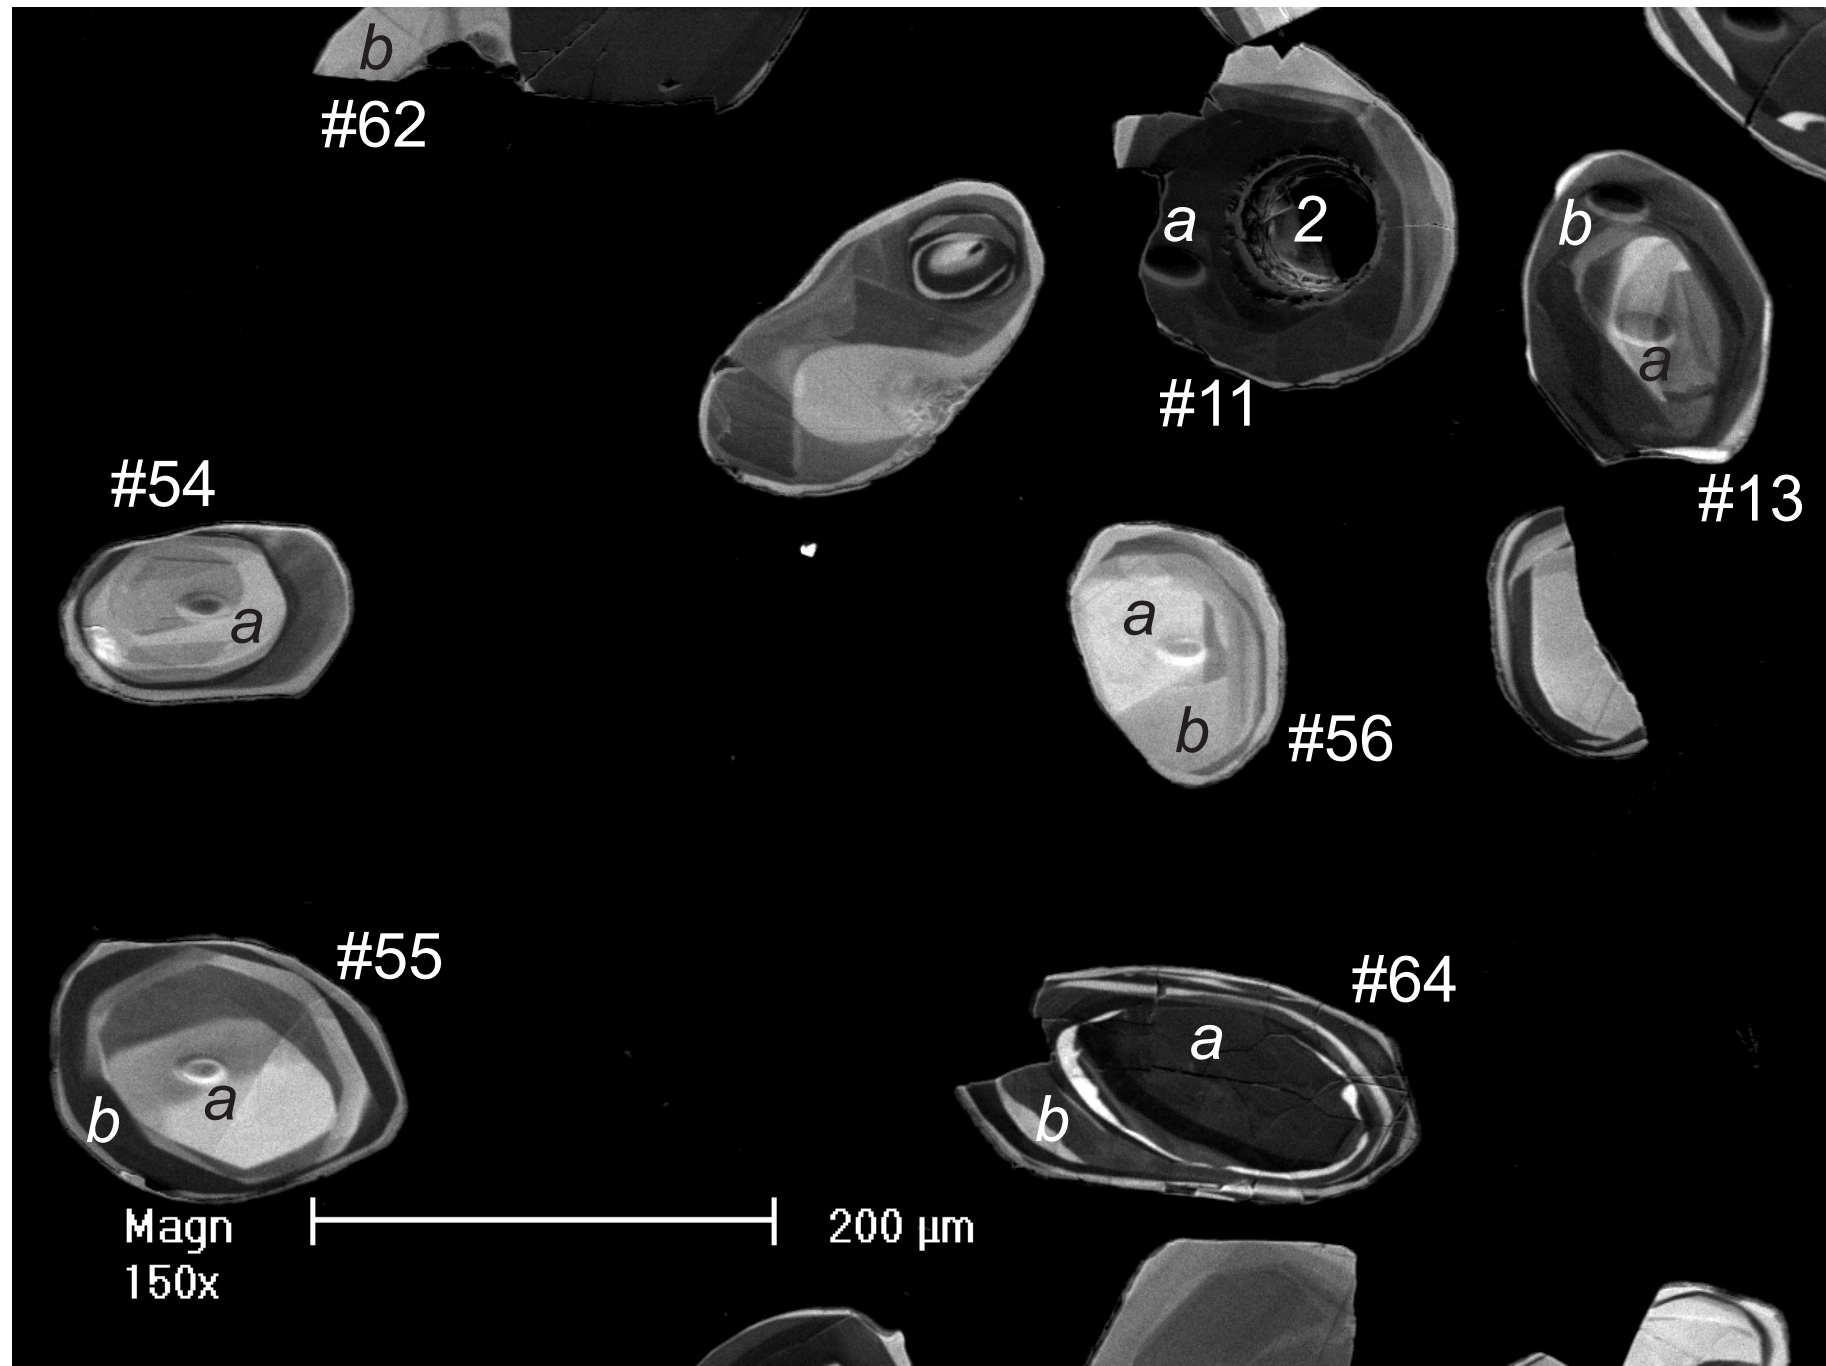

Figure S2 CL documentation of grains in Lew99-GE

GE-7B

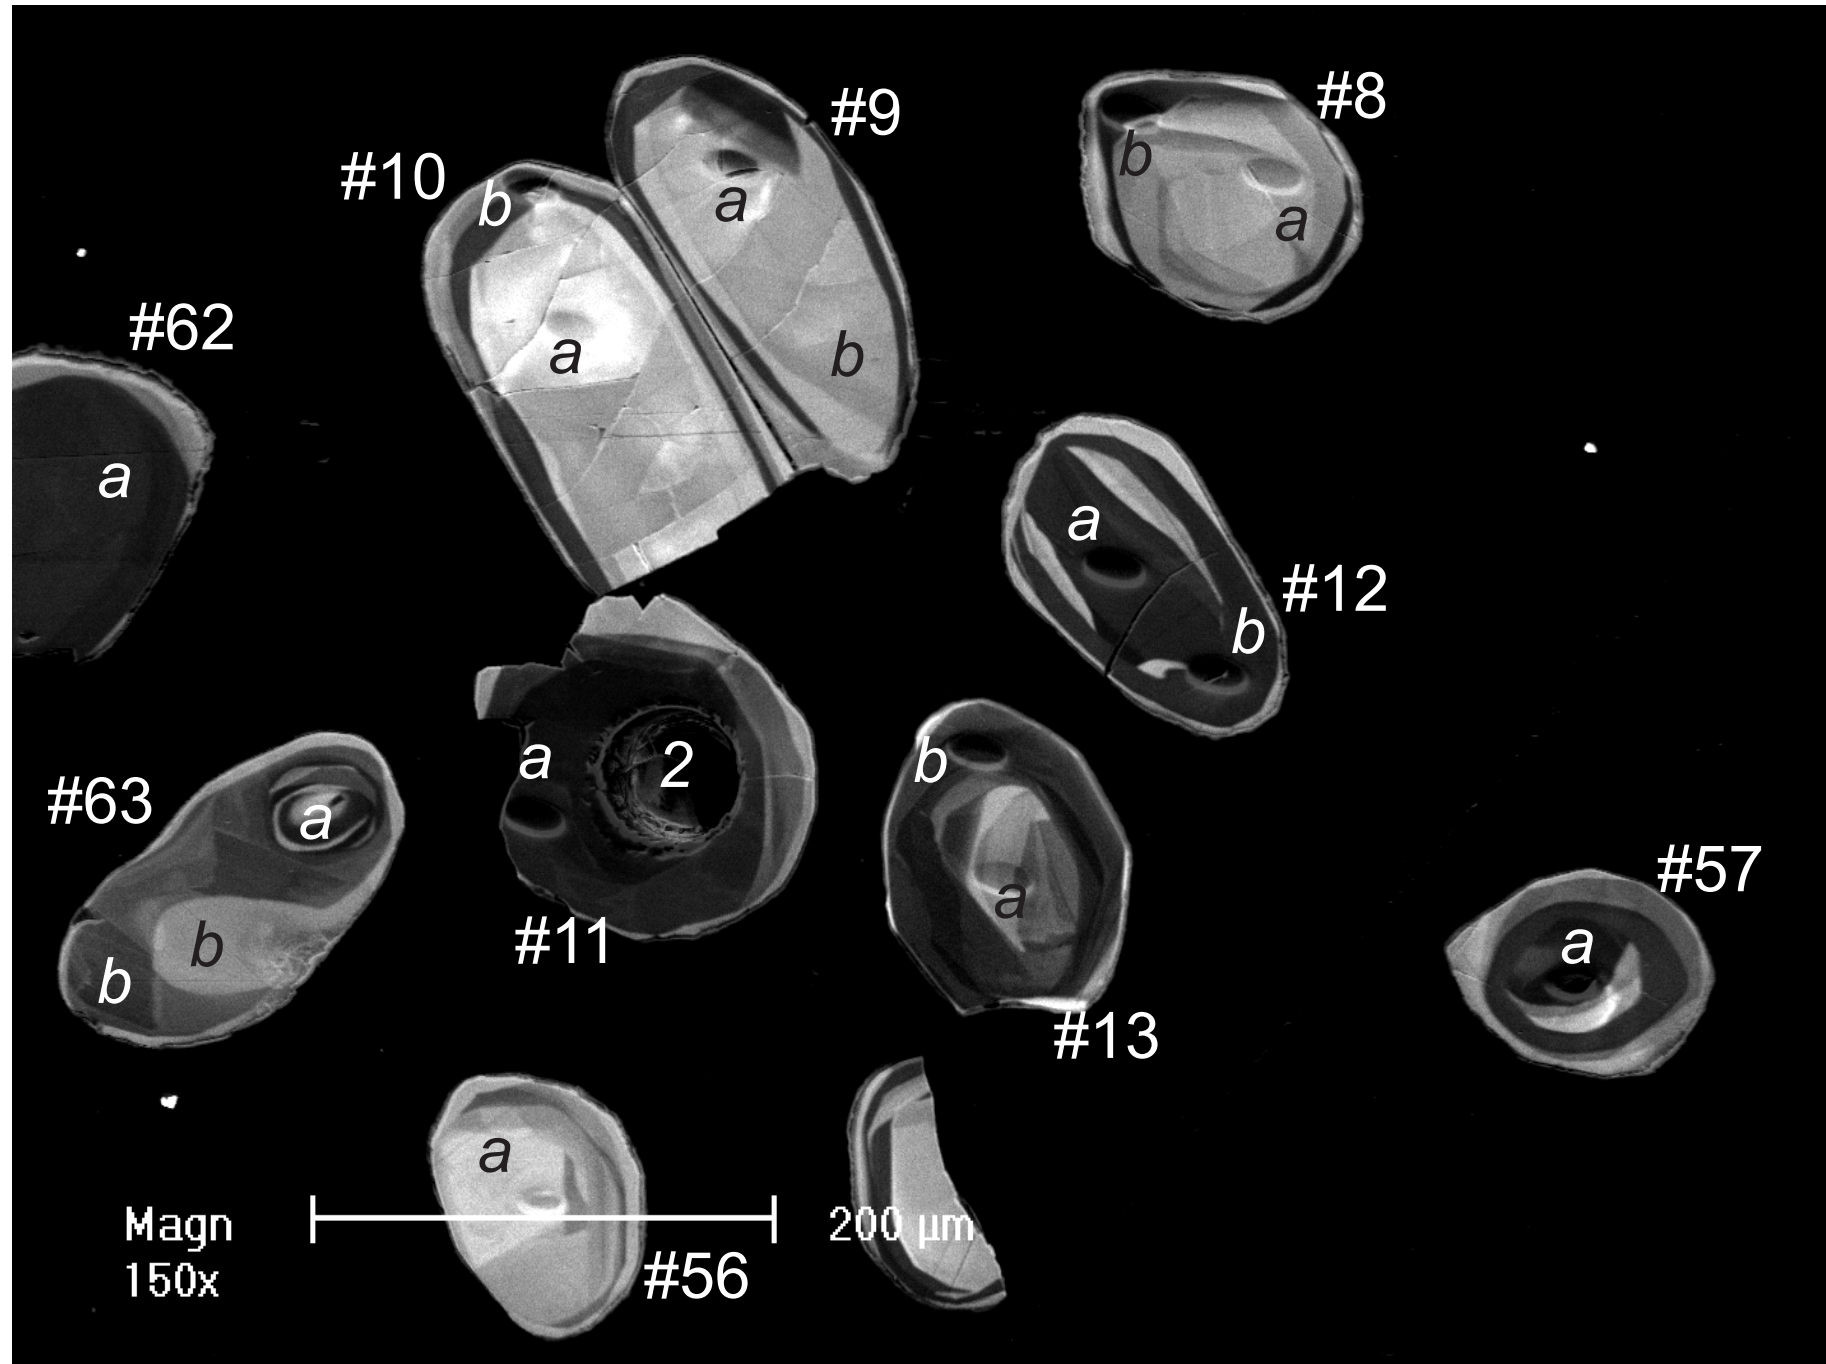

Figure S2 CL documentation of grains in Lew99-GE

GE-8A

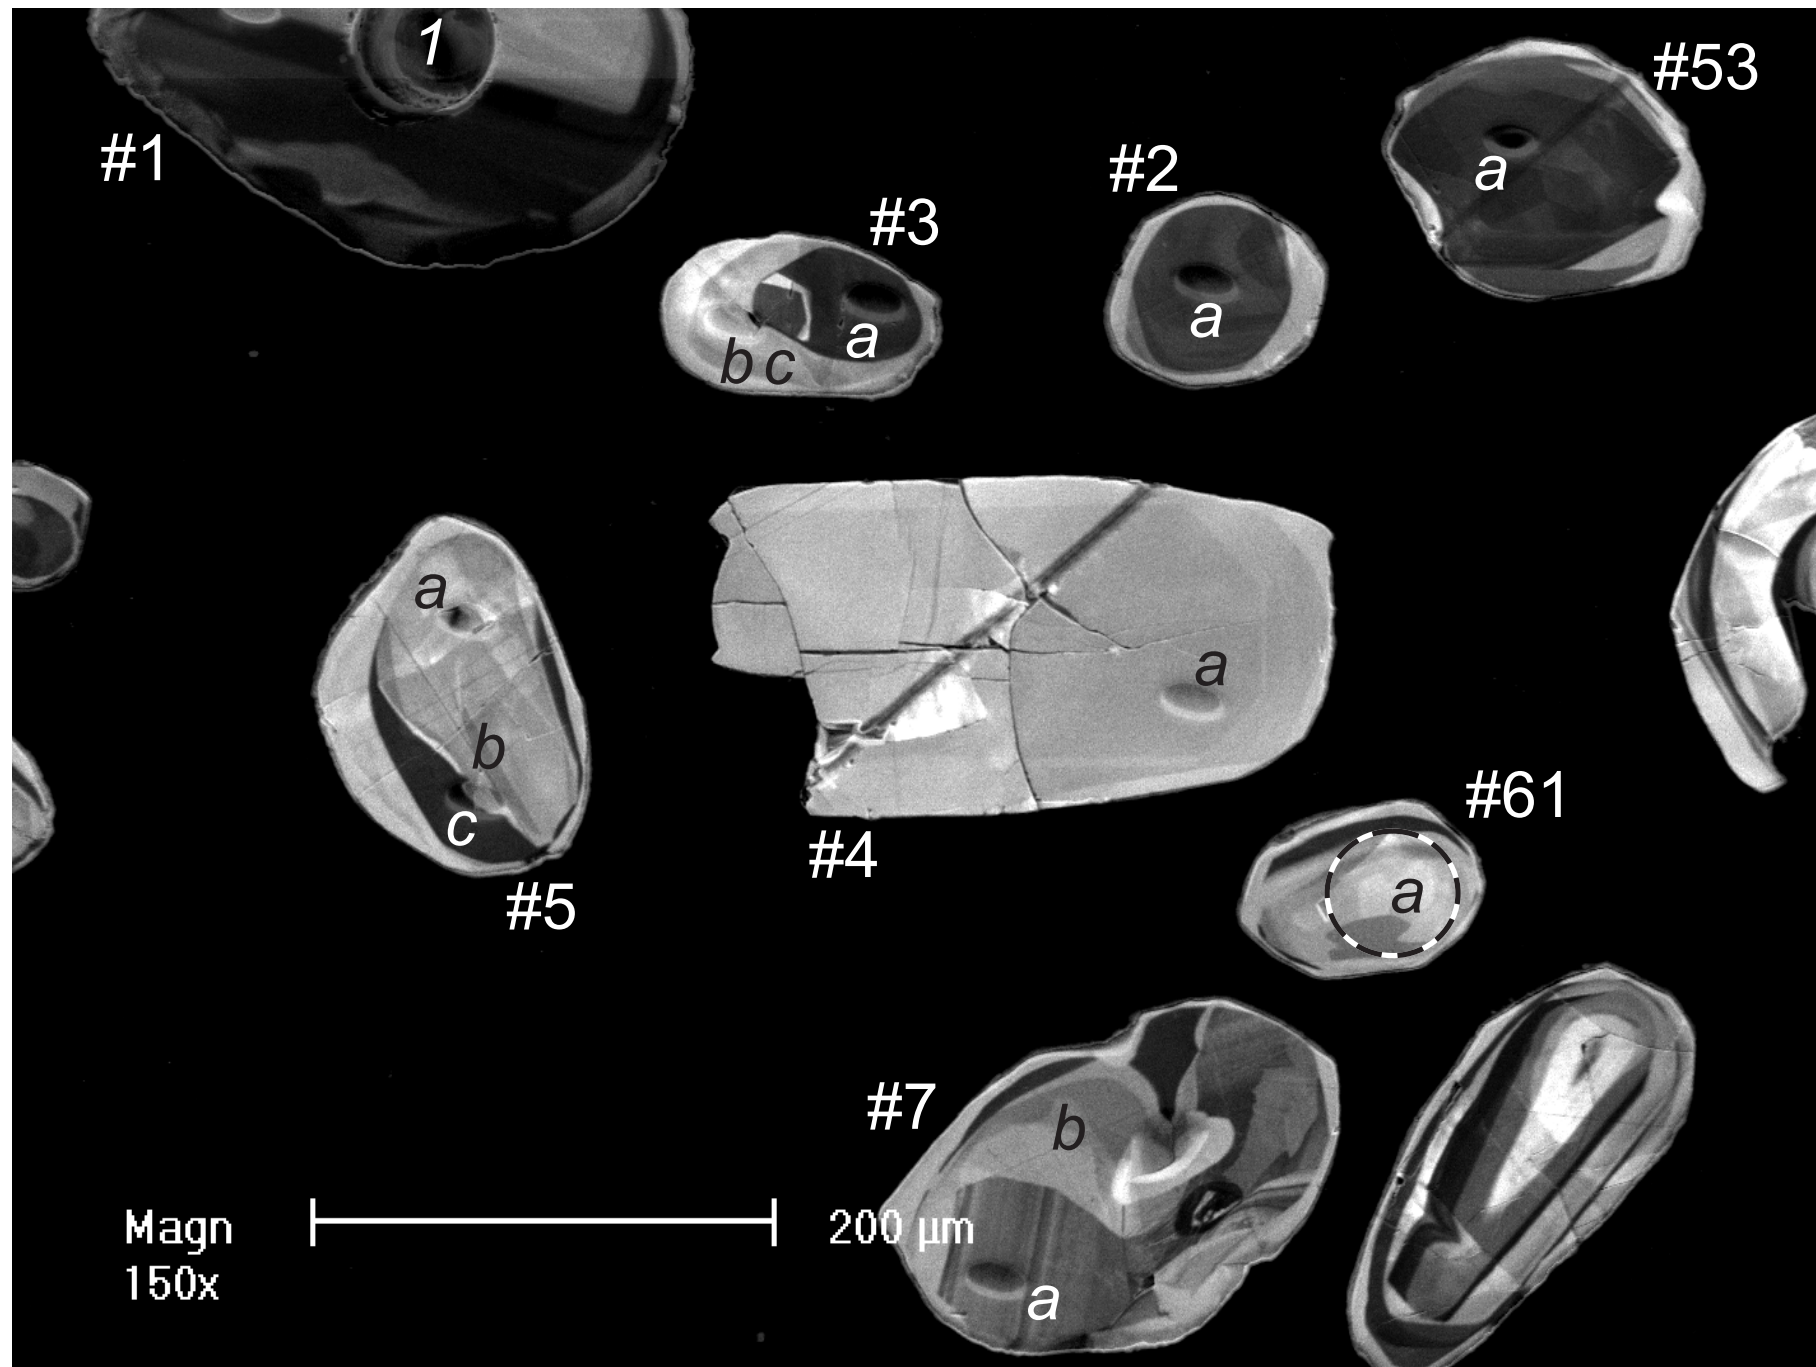

Figure S2 CL documentation of grains in Lew99-GE

GE-8B

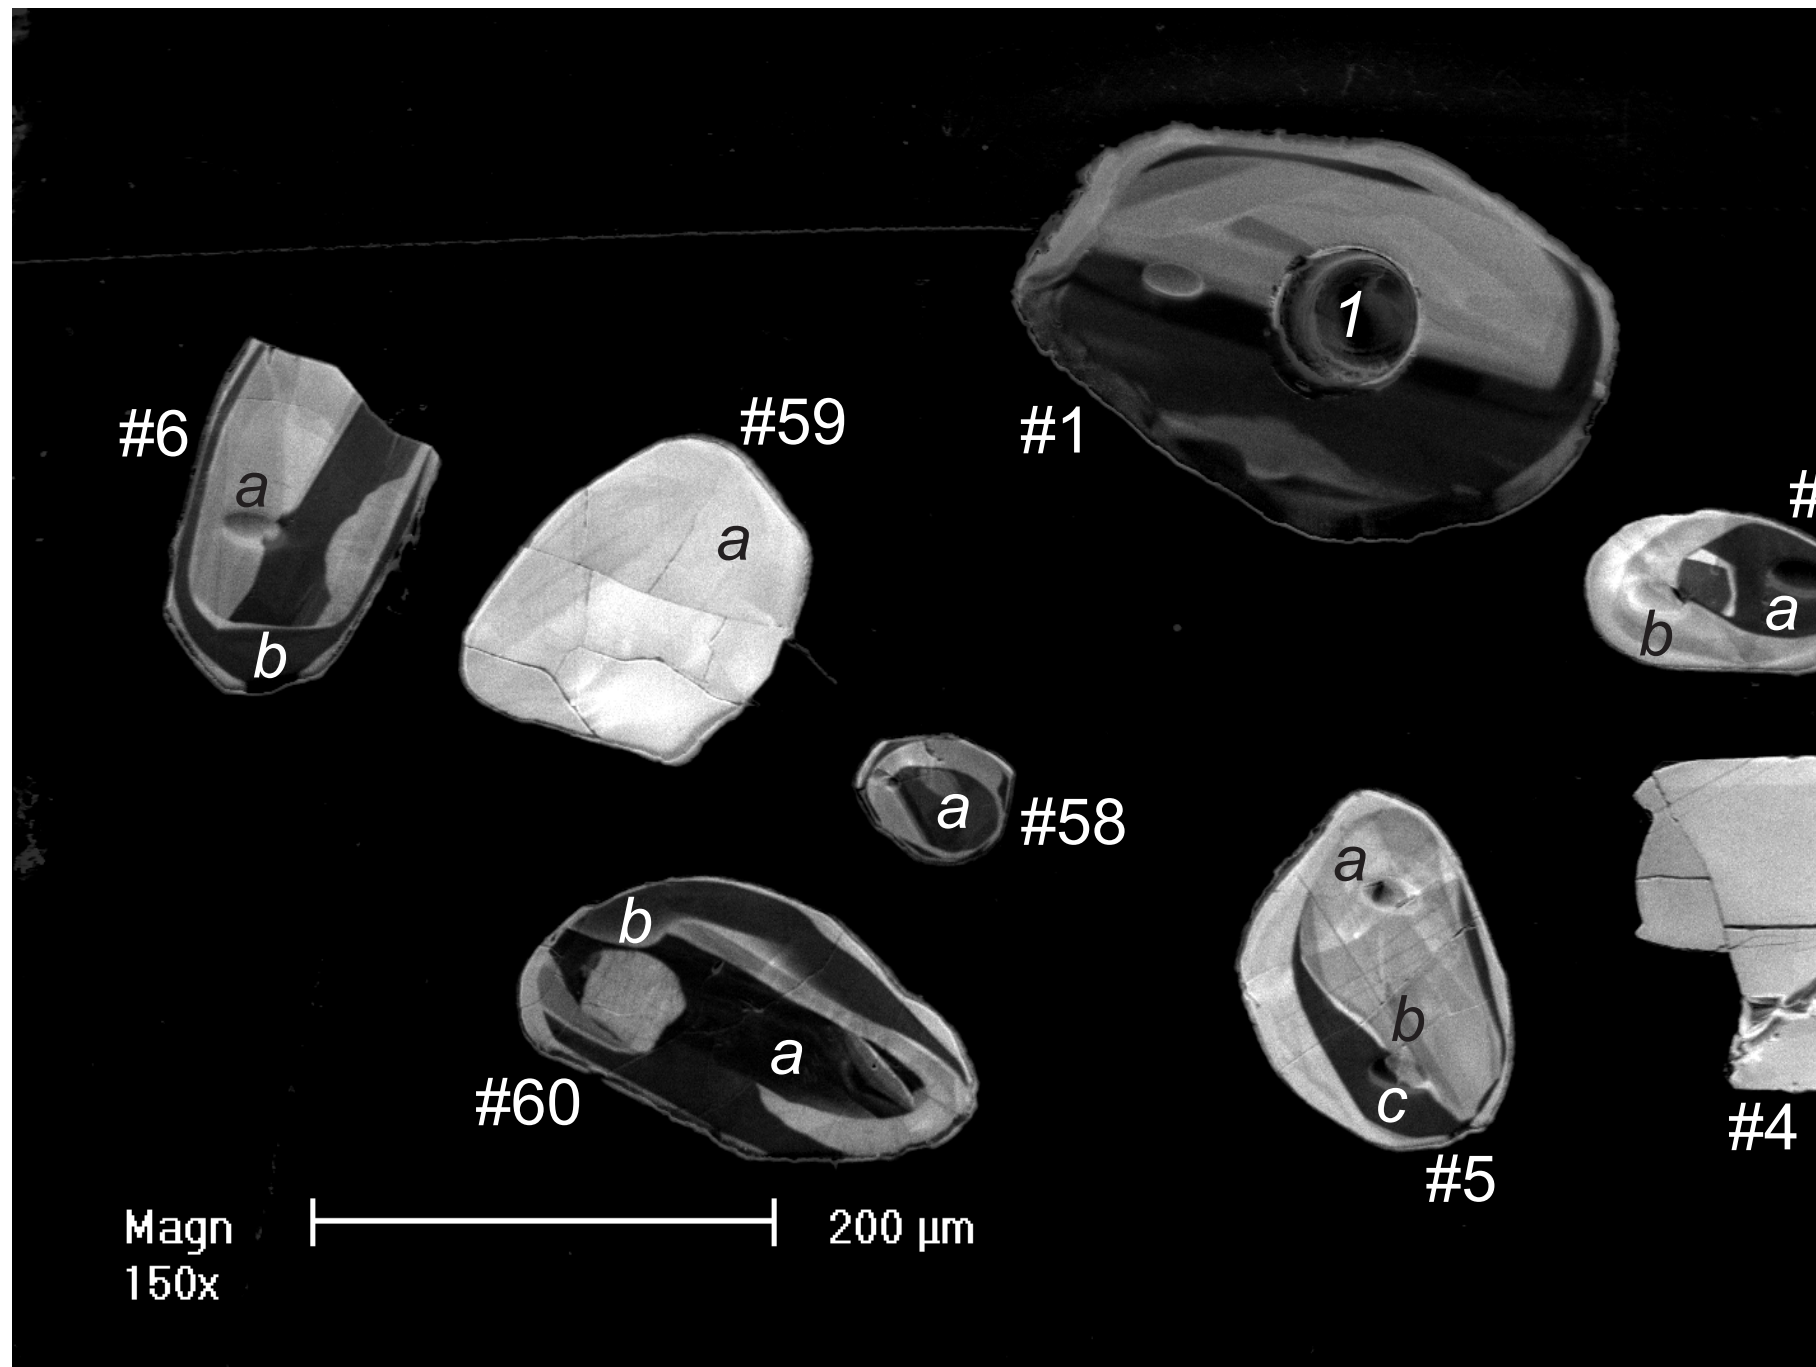

Figure S2 CL documentation of grains in Lew99-GE
