# Supplementary material
Source: publisher figshare collection journal article supplement (https://geolsoc.figshare.com/articles/dataset/_/3454805)
Supplement: Supplementary file 2 [file 1]

Ky-1A

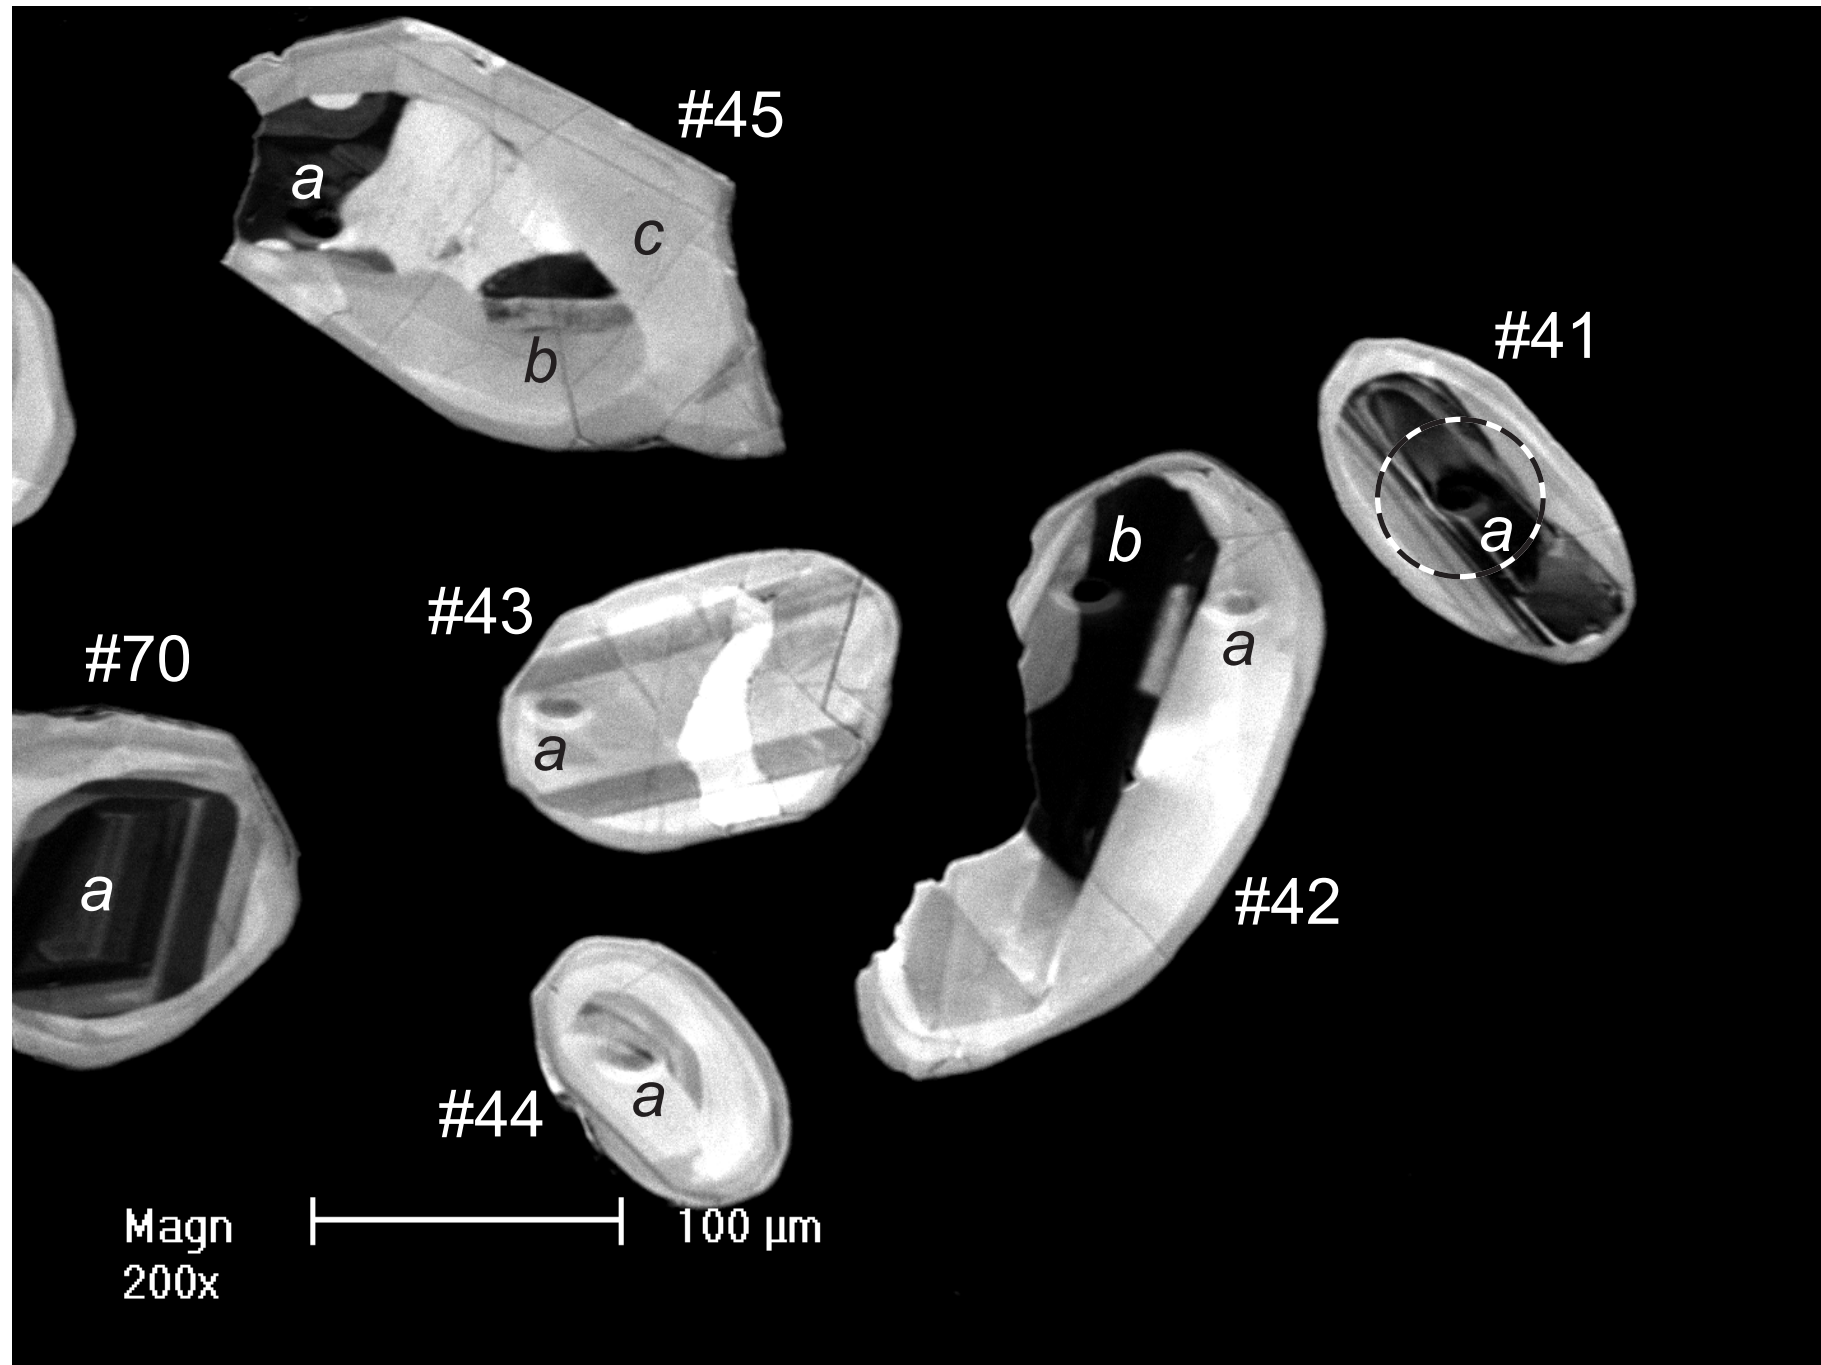

Figure S1 CL documentation of grains in Lew99-Ky

Ky-1B

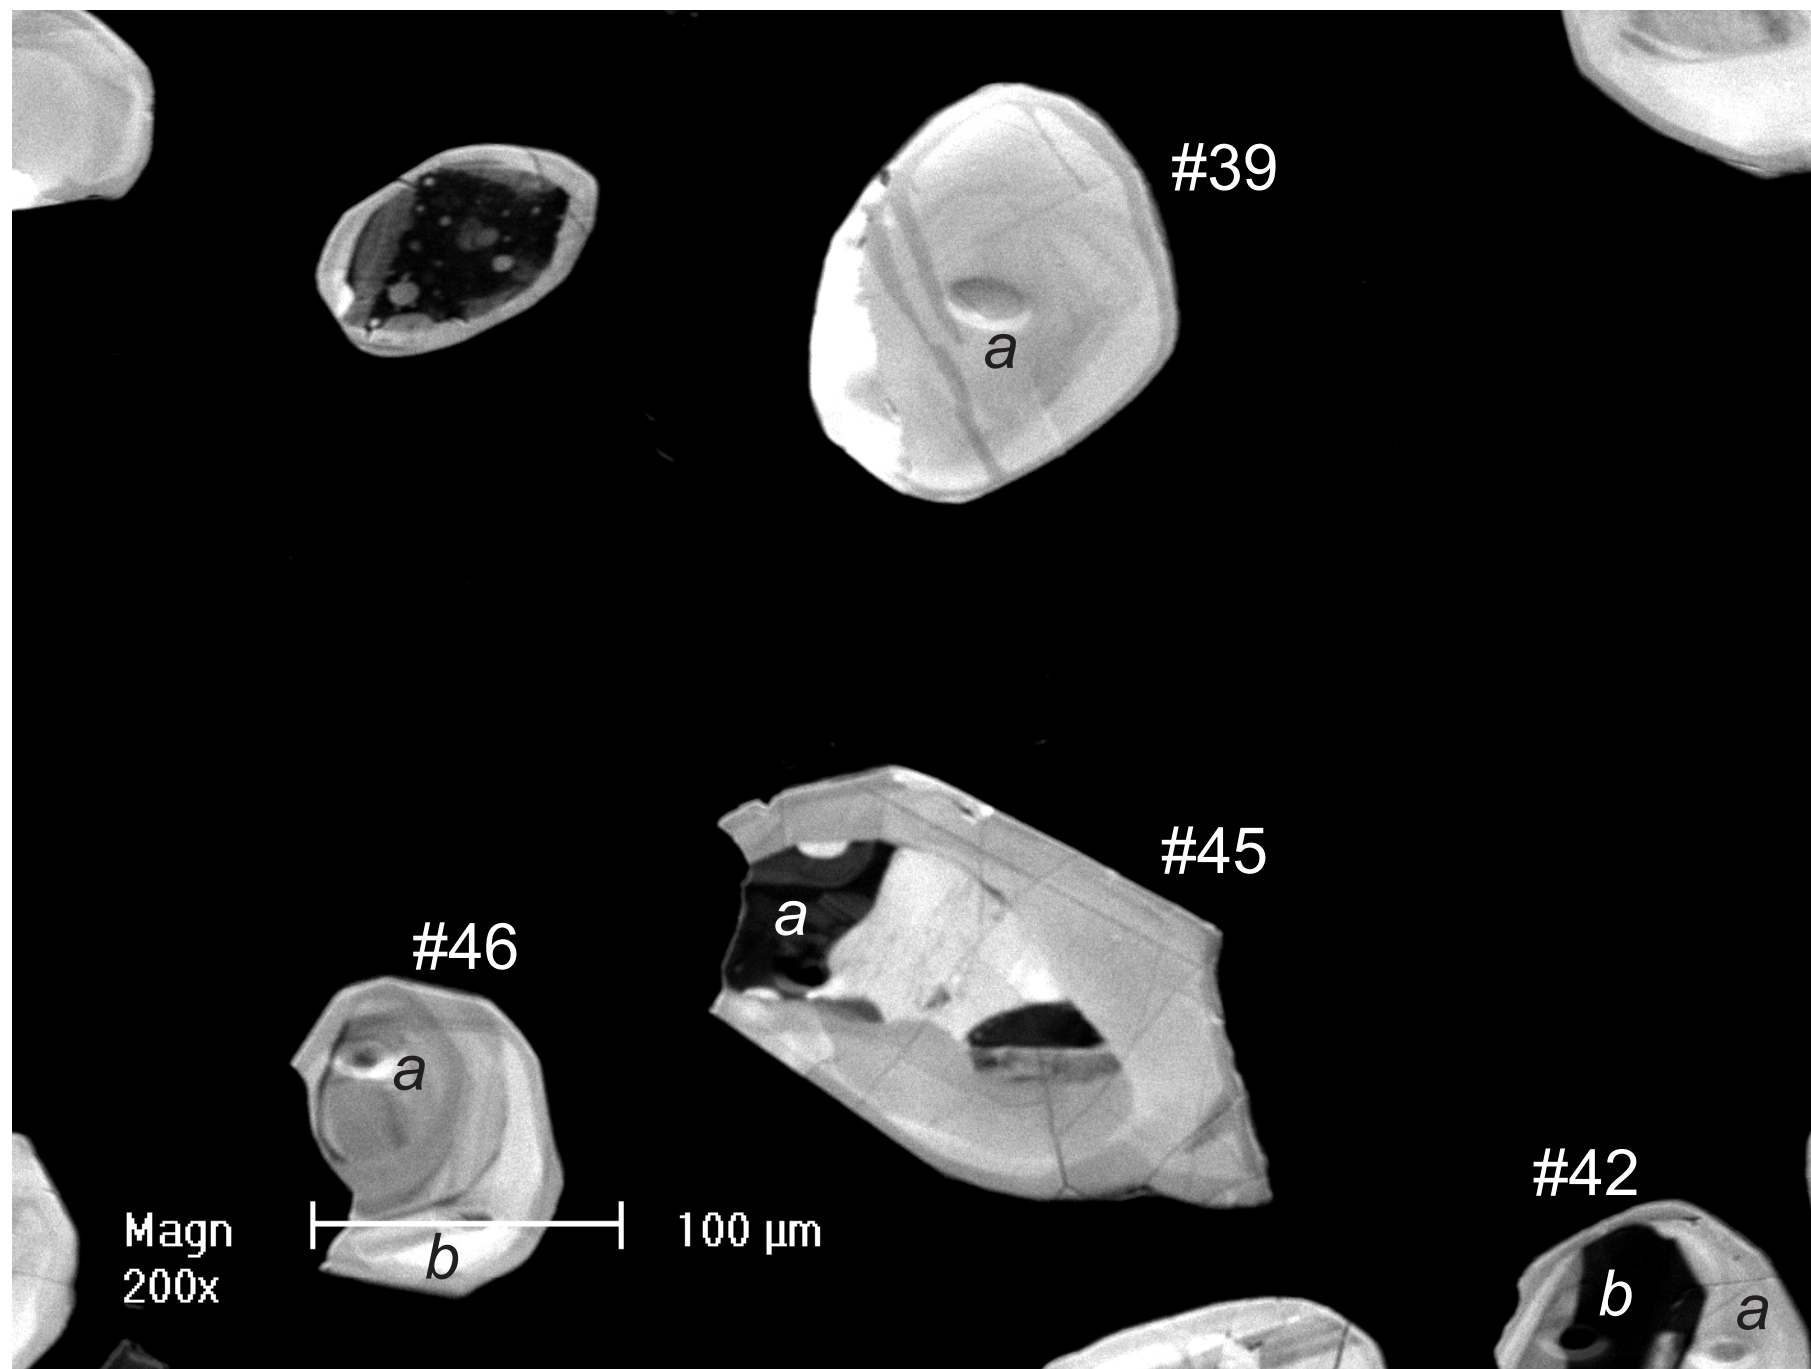

Figure S1 CL documentation of grains in Lew99-Ky

Ky-1C

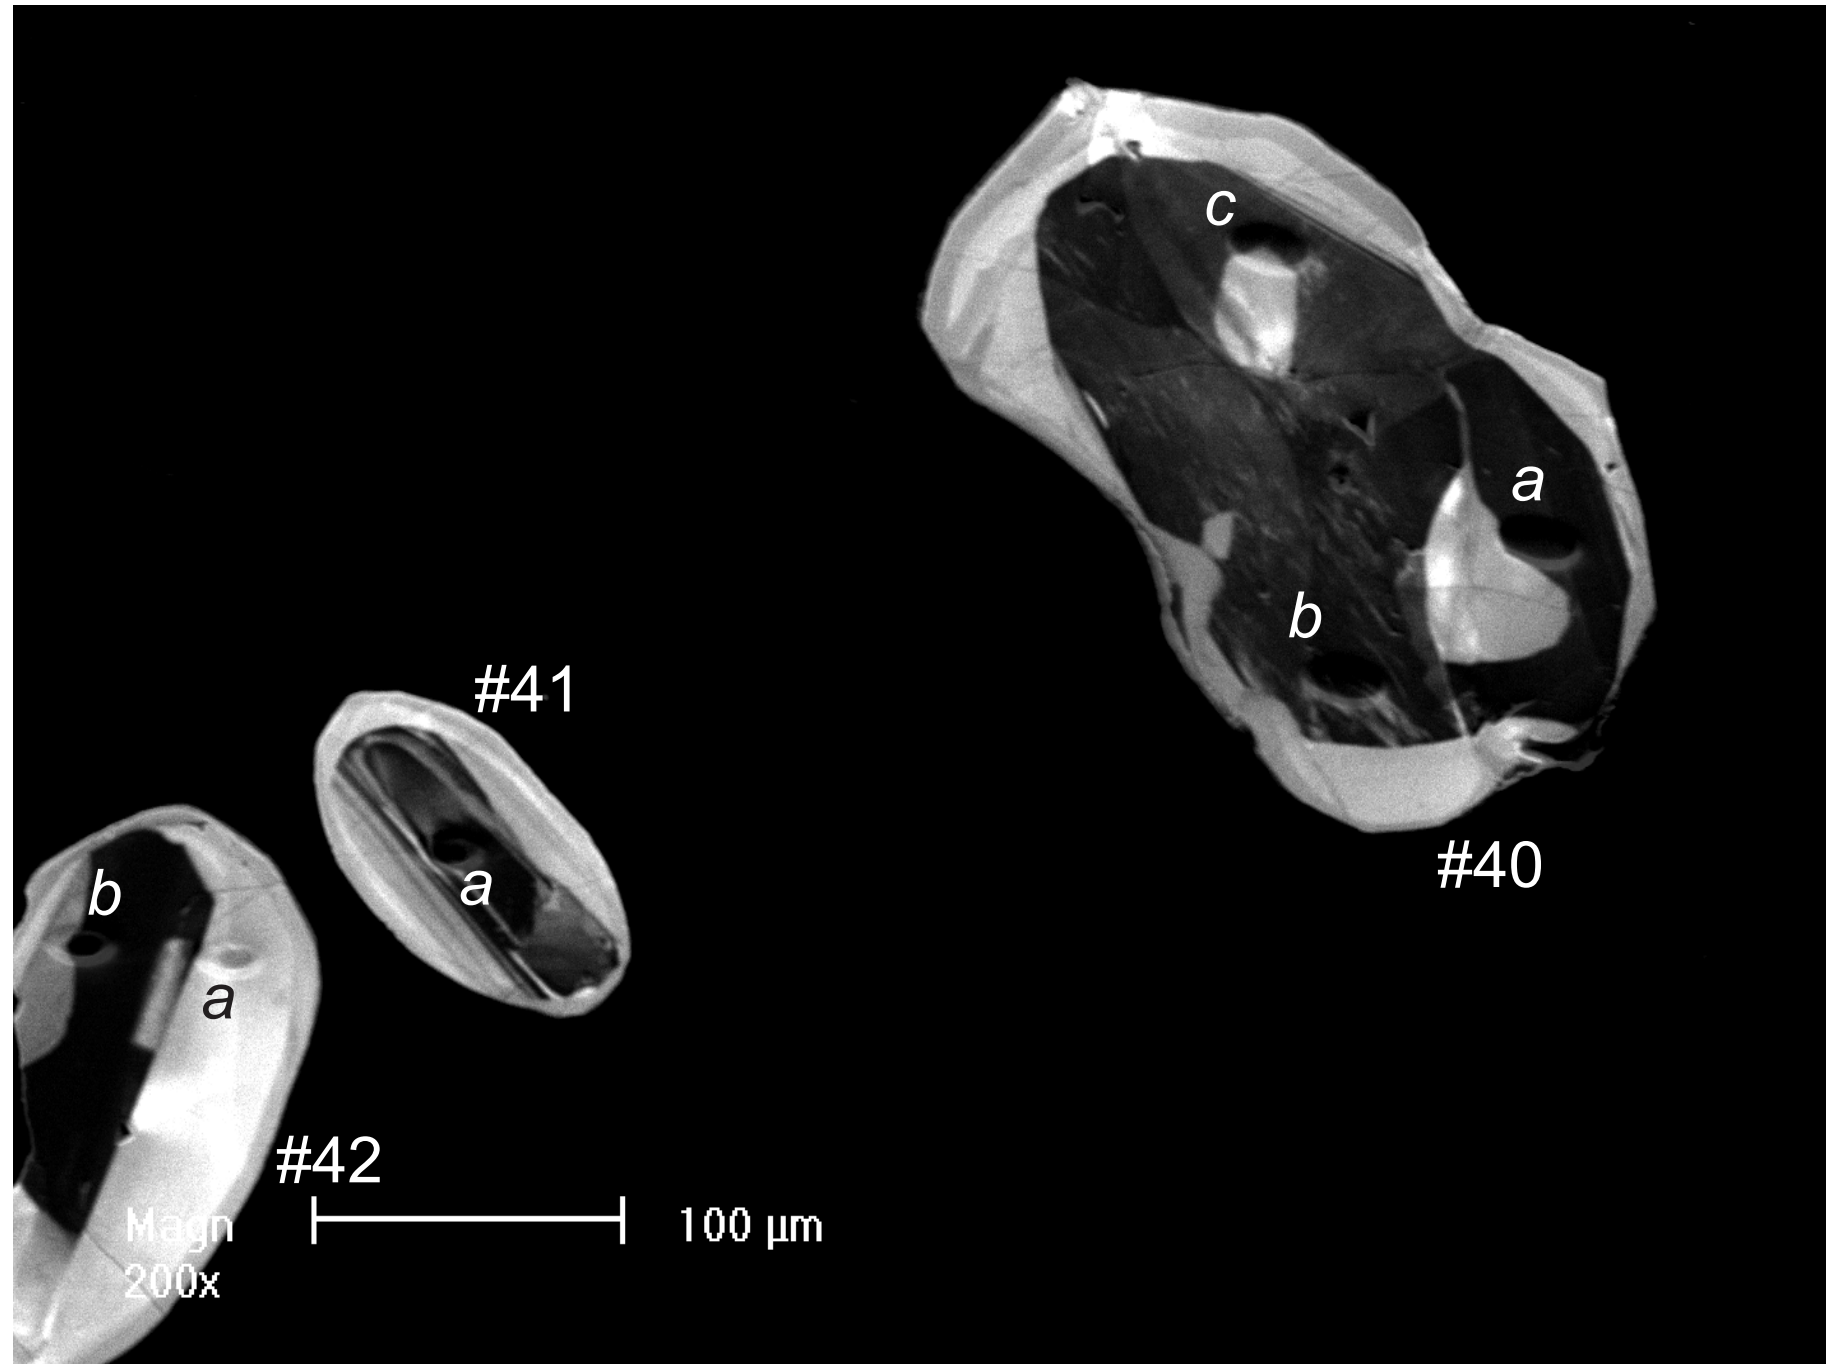

Figure S1 CL documentation of grains in Lew99-Ky

Ky-1D

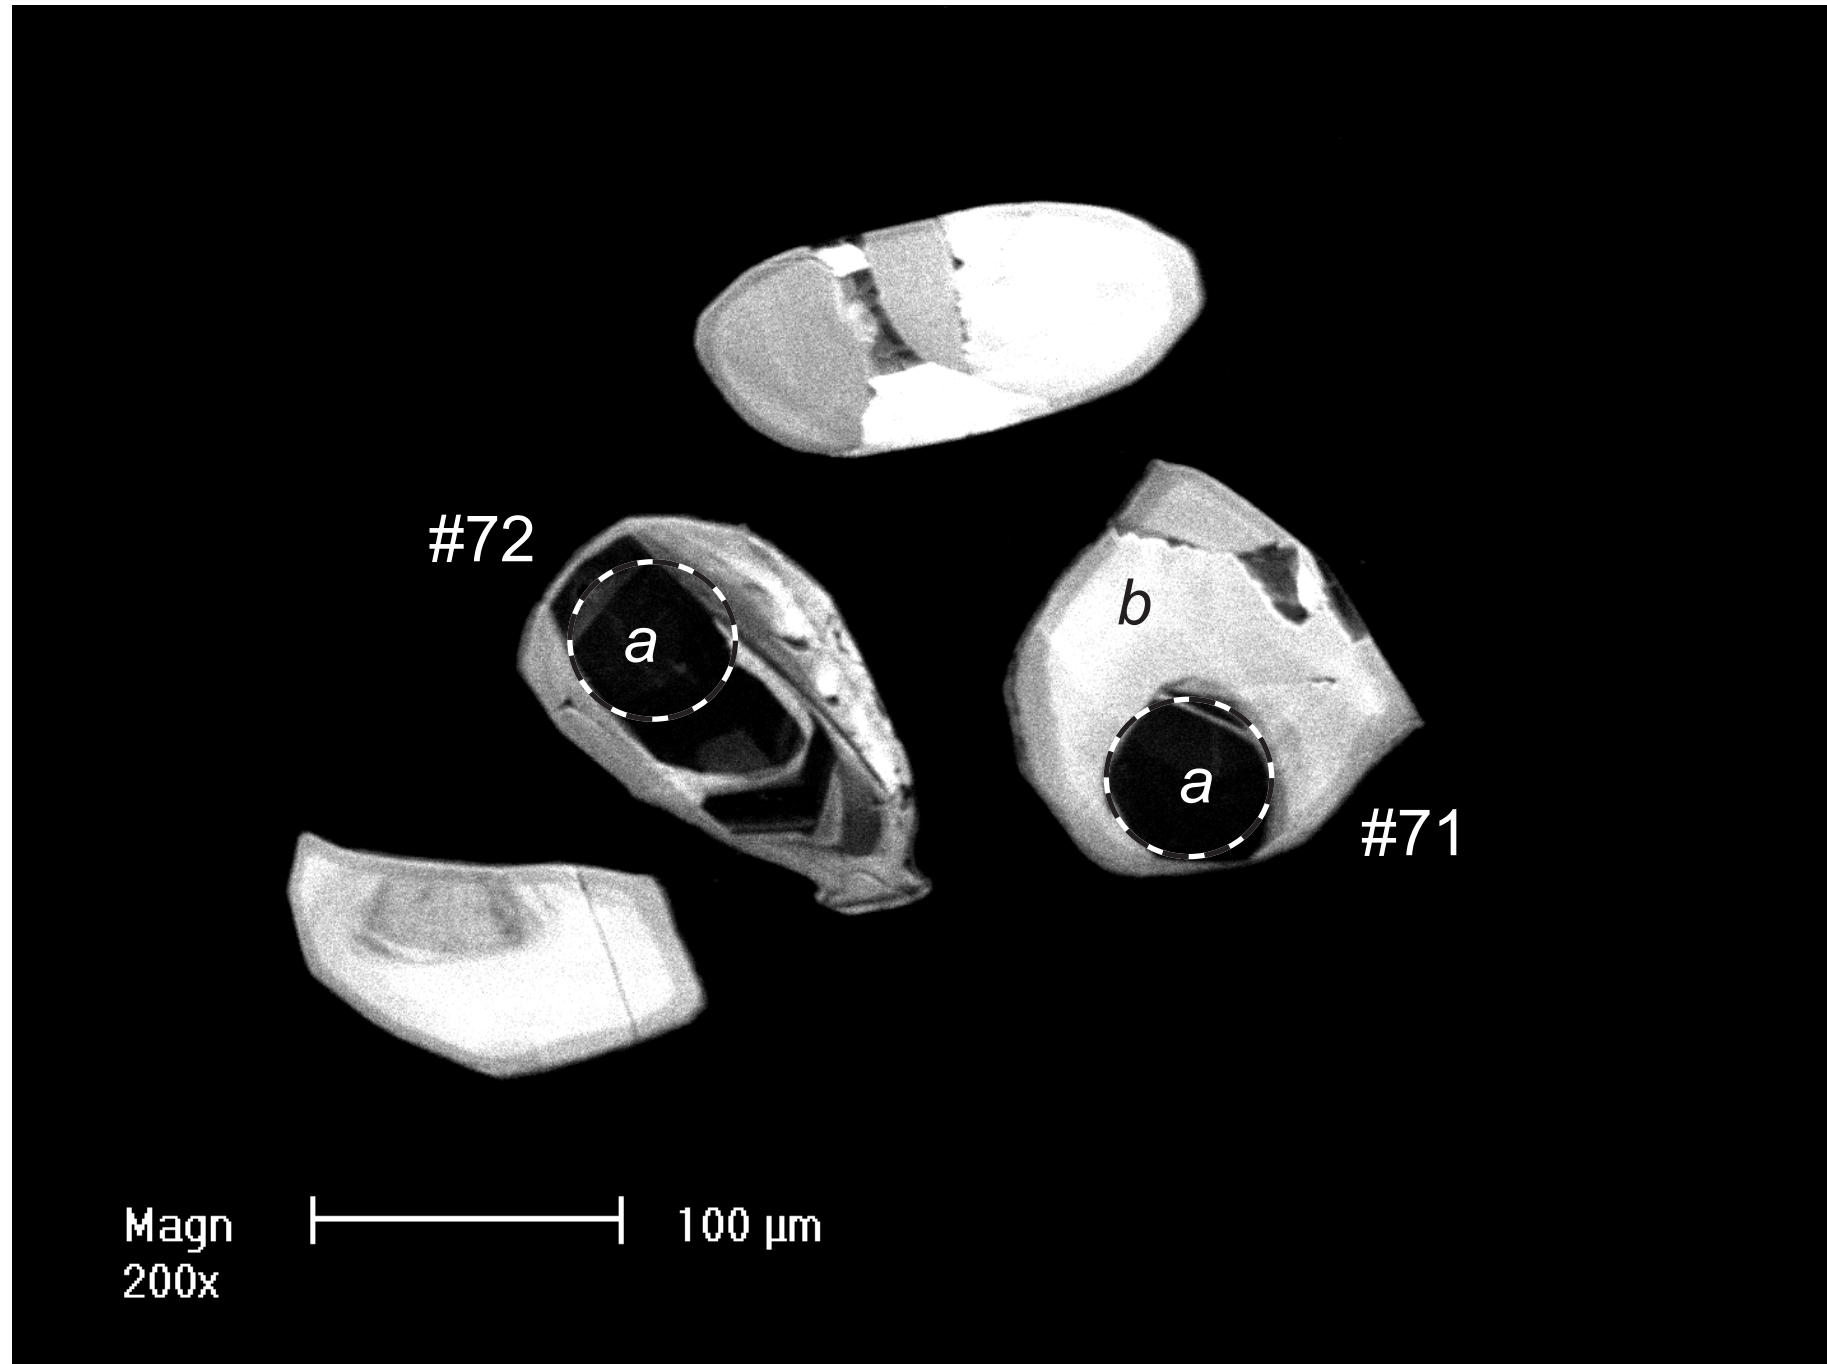

Figure S1 CL documentation of grains in Lew99-Ky



Ky-2A

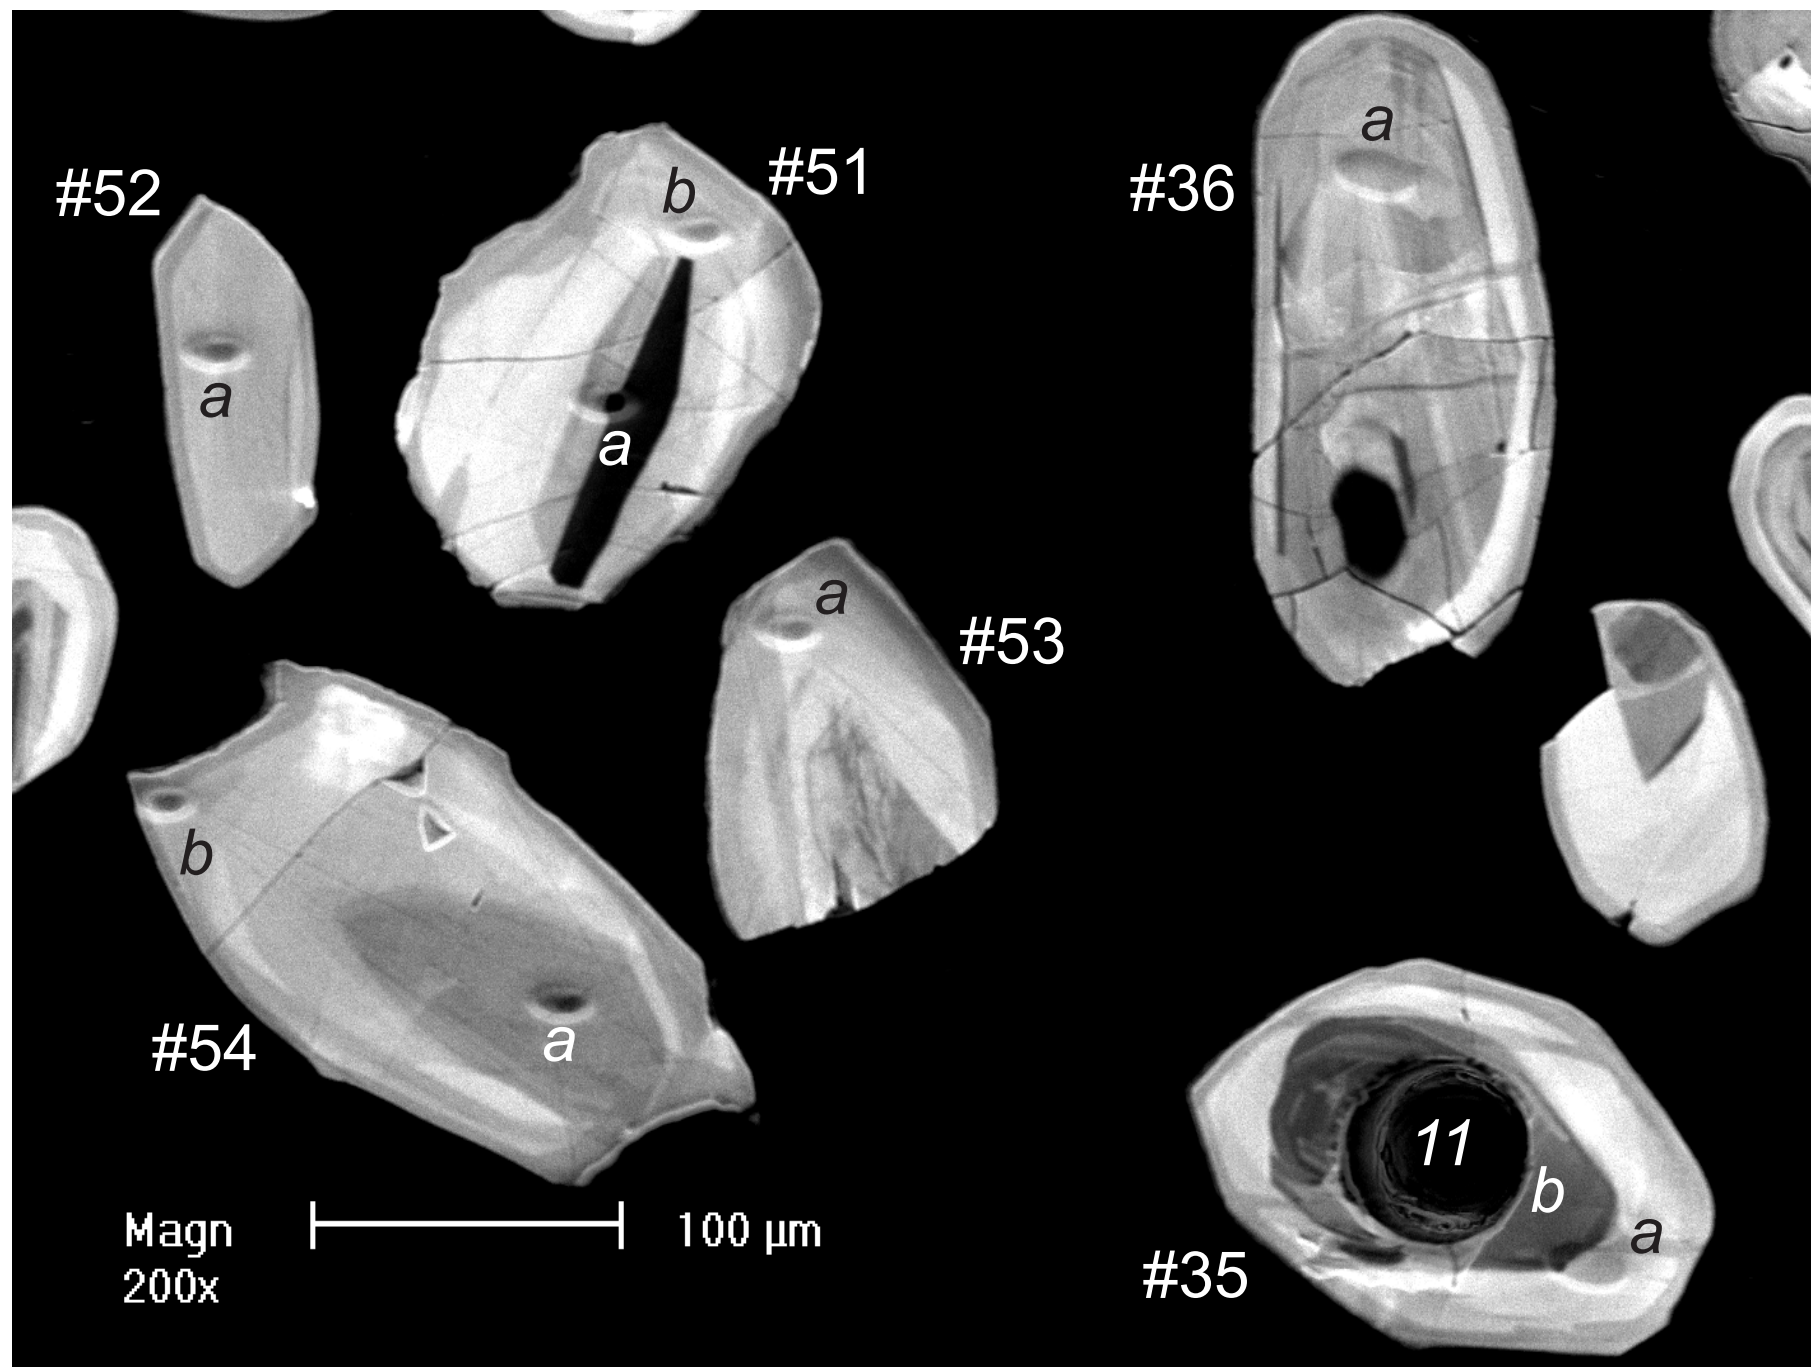

Figure S1 CL documentation of grains in Lew99-Ky

Ky-2B

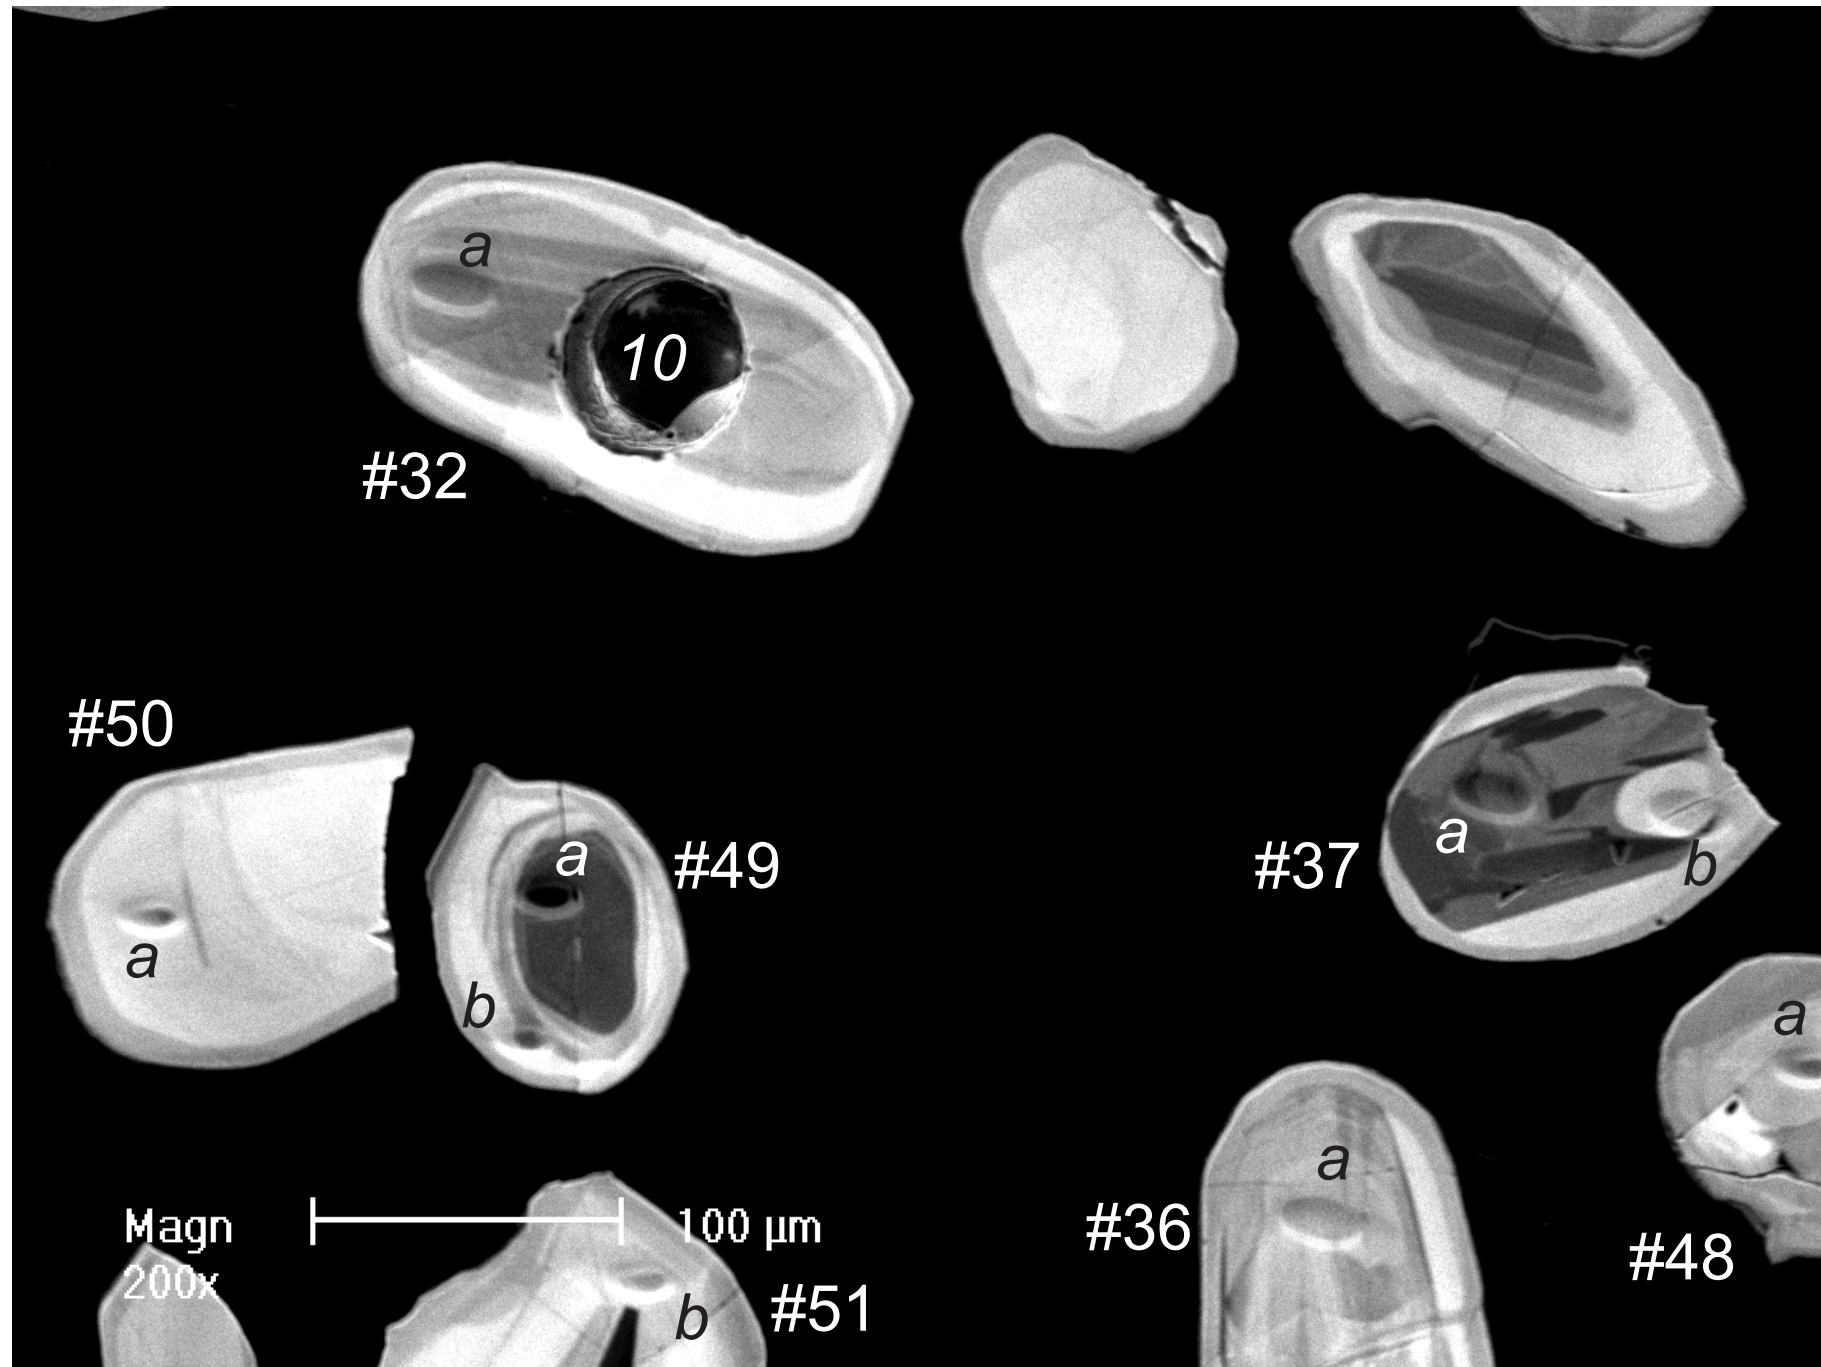

Figure S1 CL documentation of grains in Lew99-Ky

Ky-2C

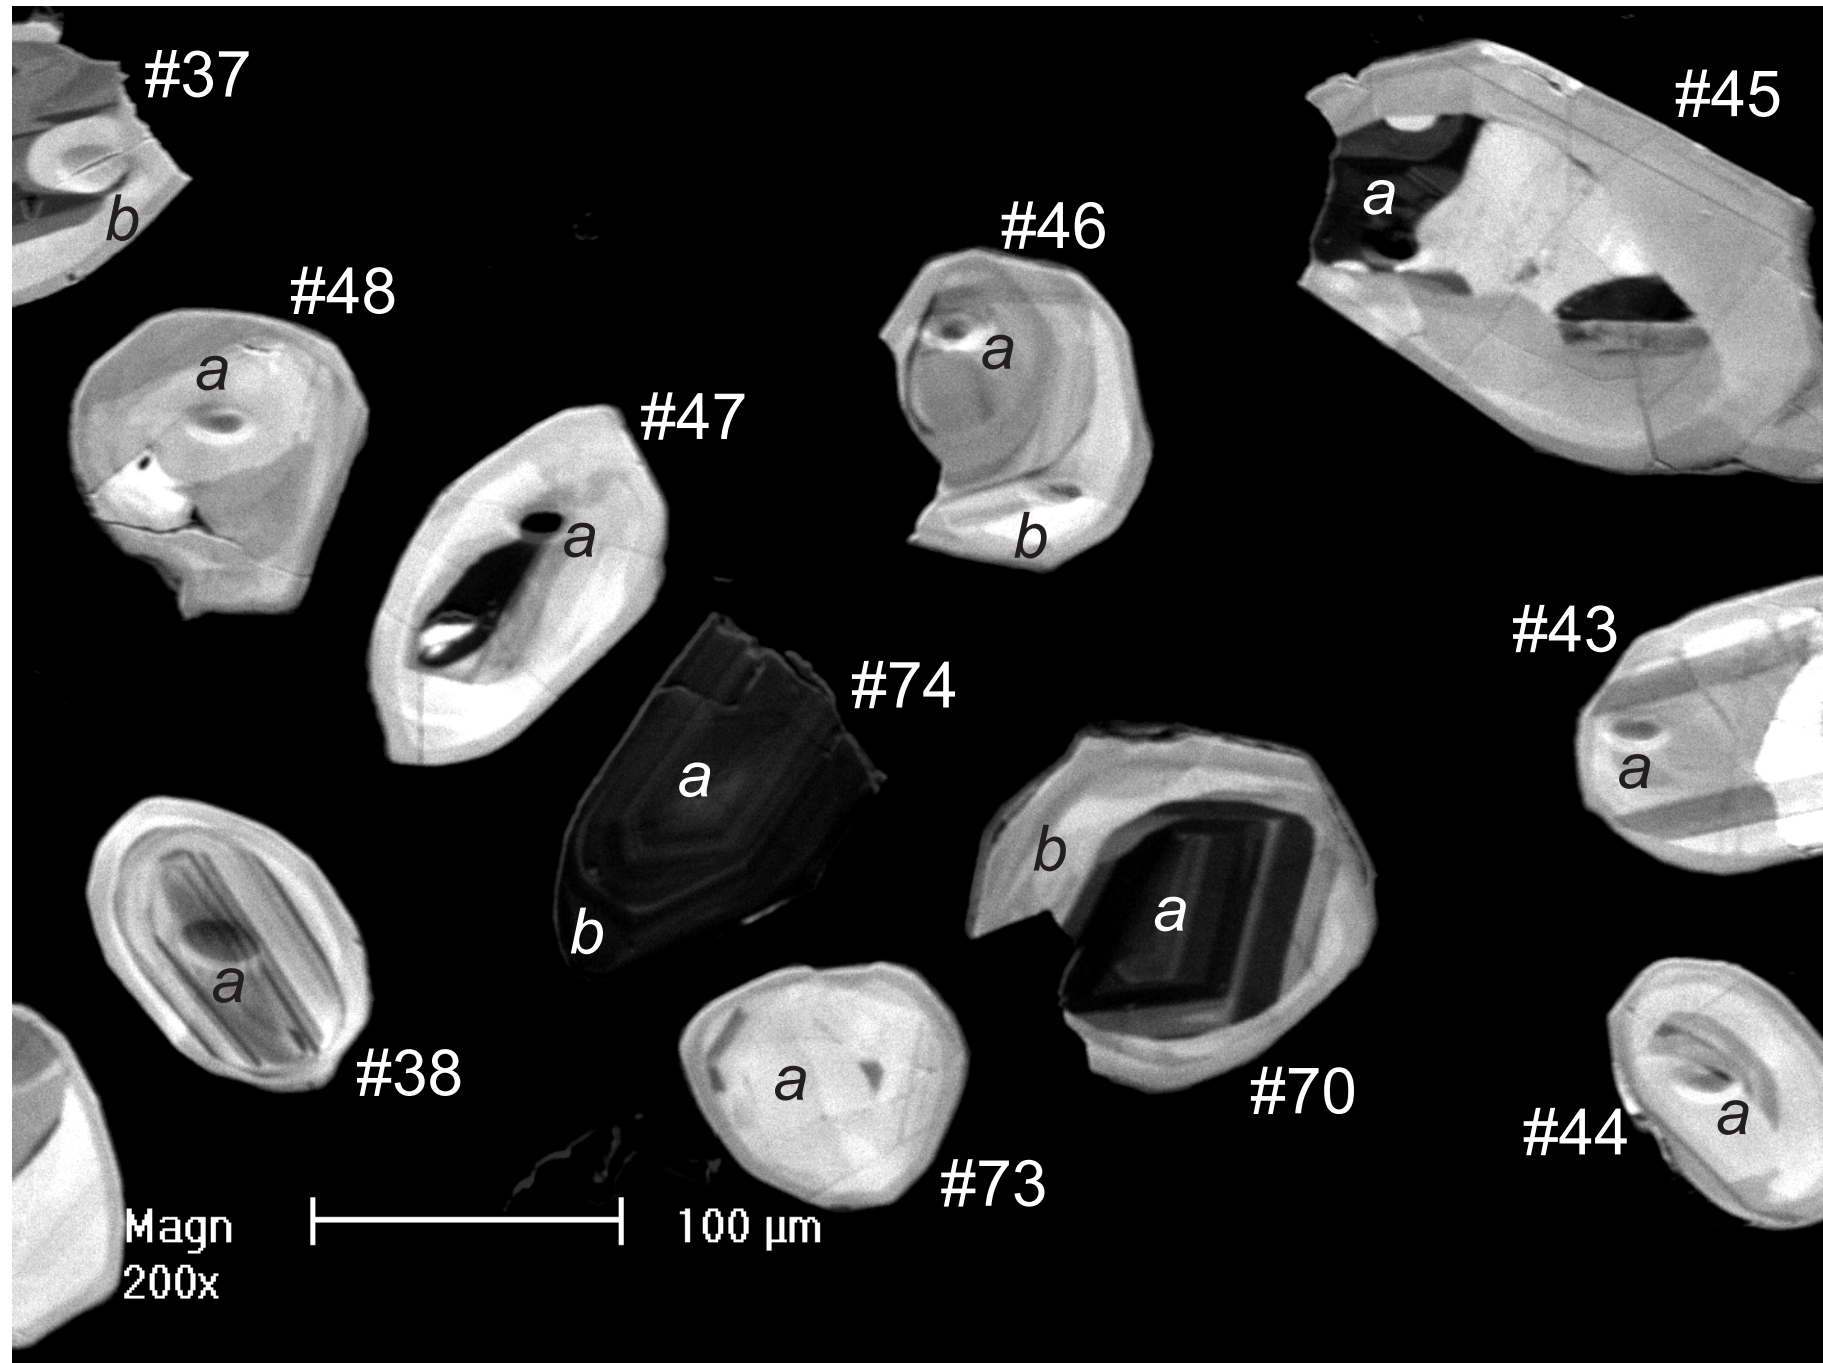

Figure S1 CL documentation of grains in Lew99-Ky



Ky-3A

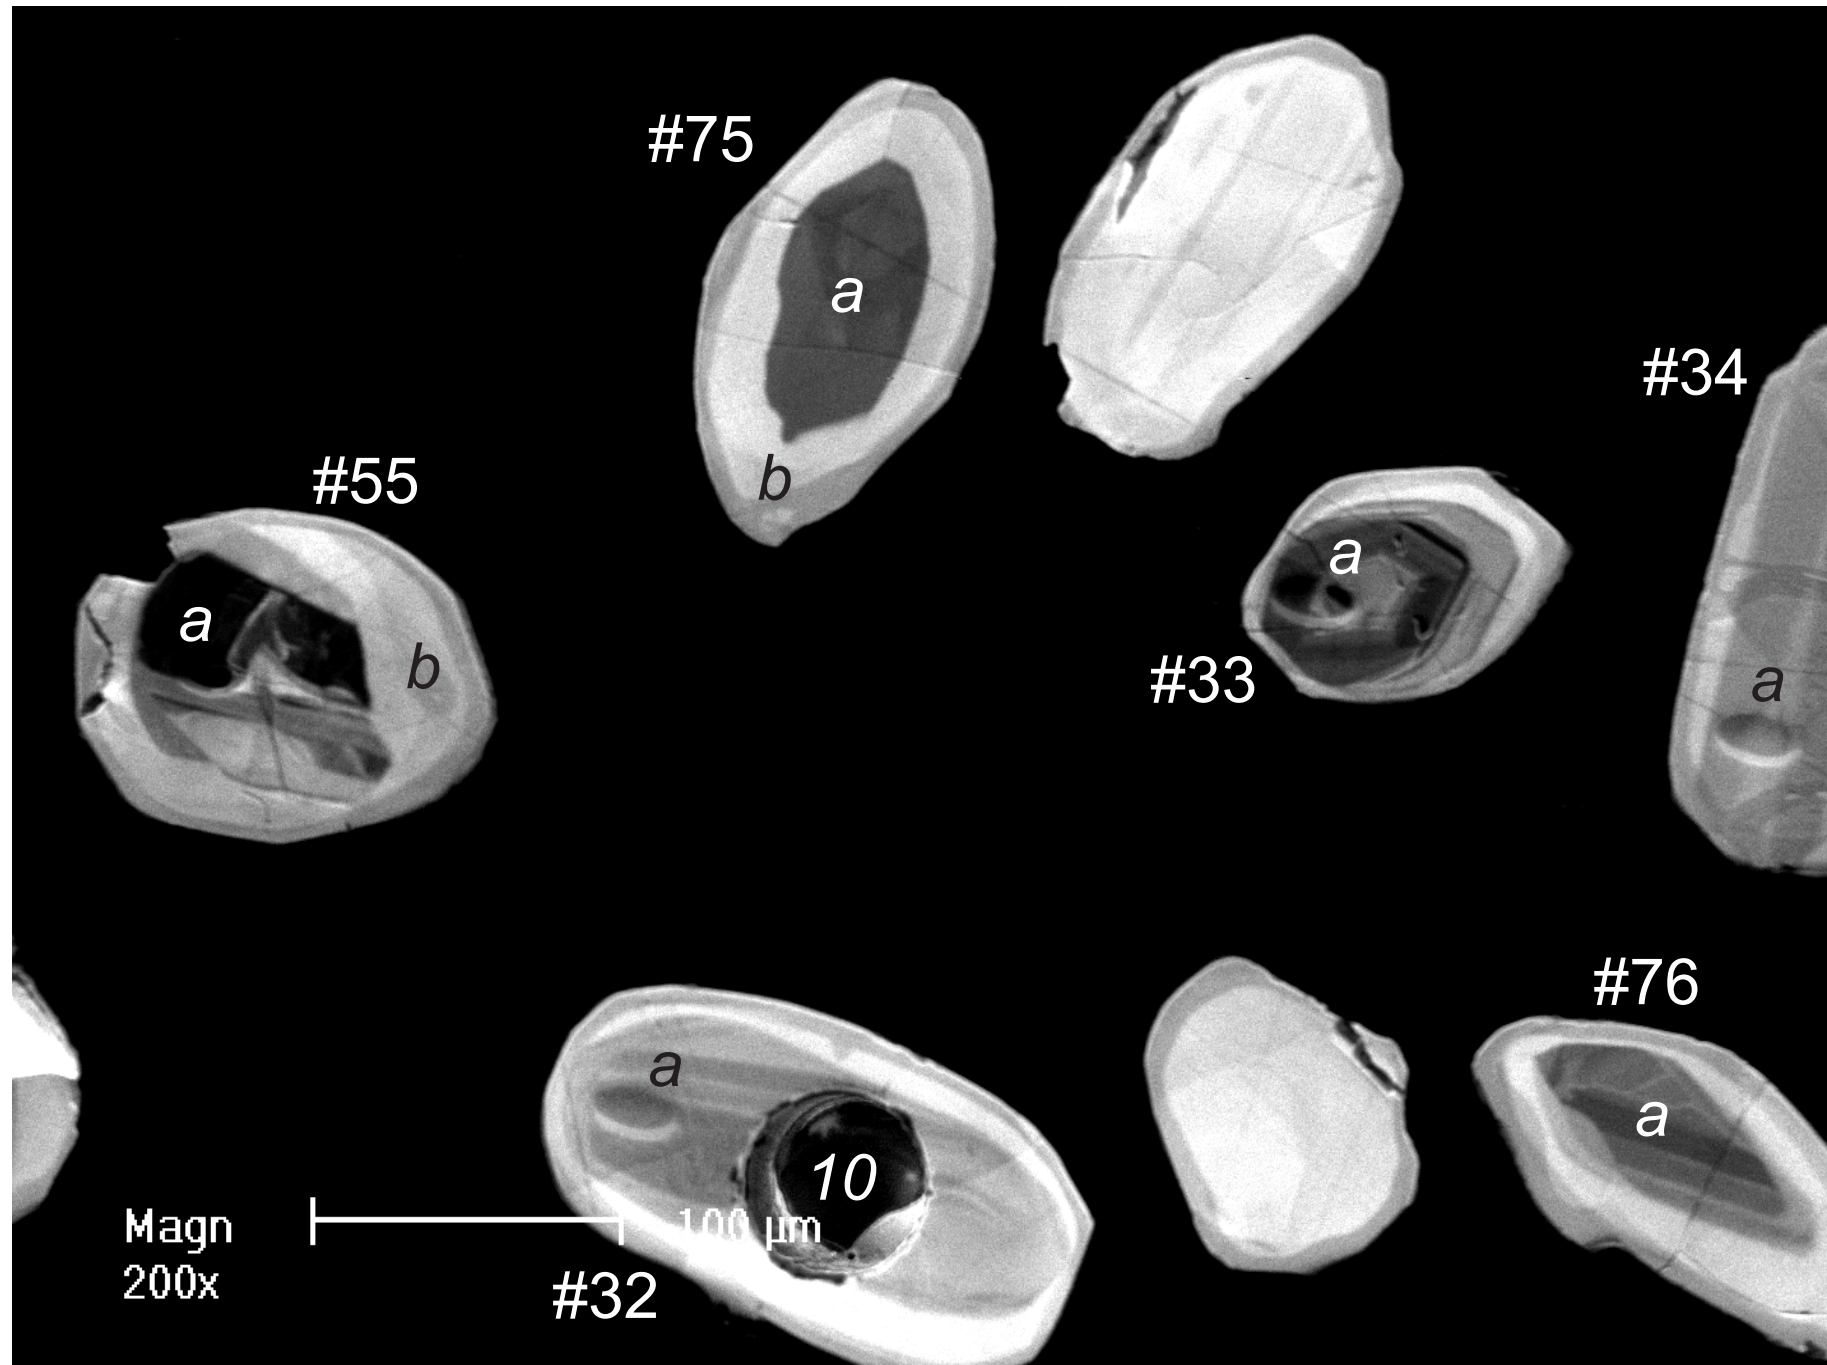

Figure S1 CL documentation of grains in Lew99-Ky



Ky-3B

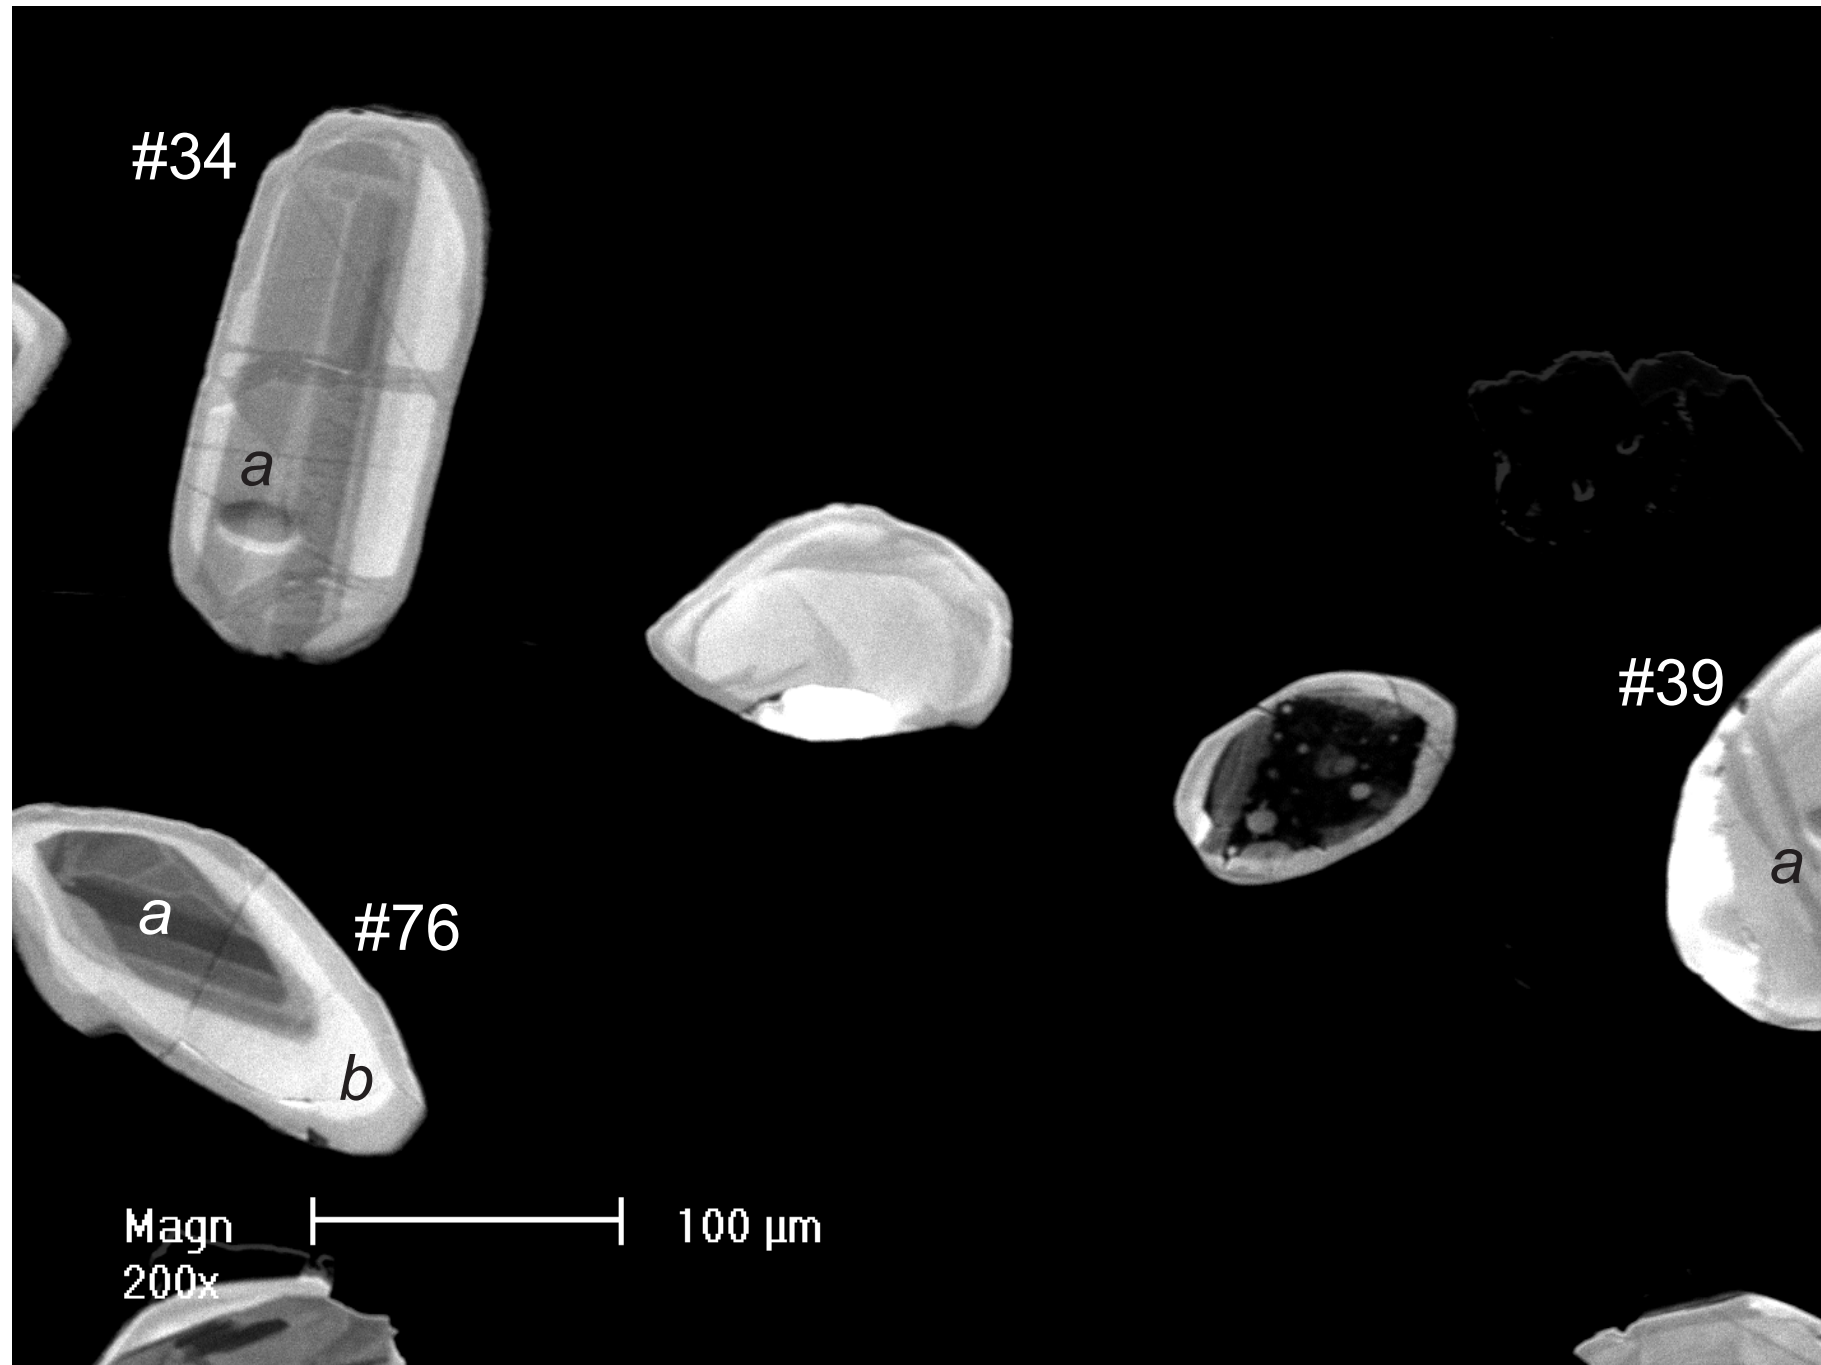

Figure S1 CL documentation of grains in Lew99-Ky

Ky-4A

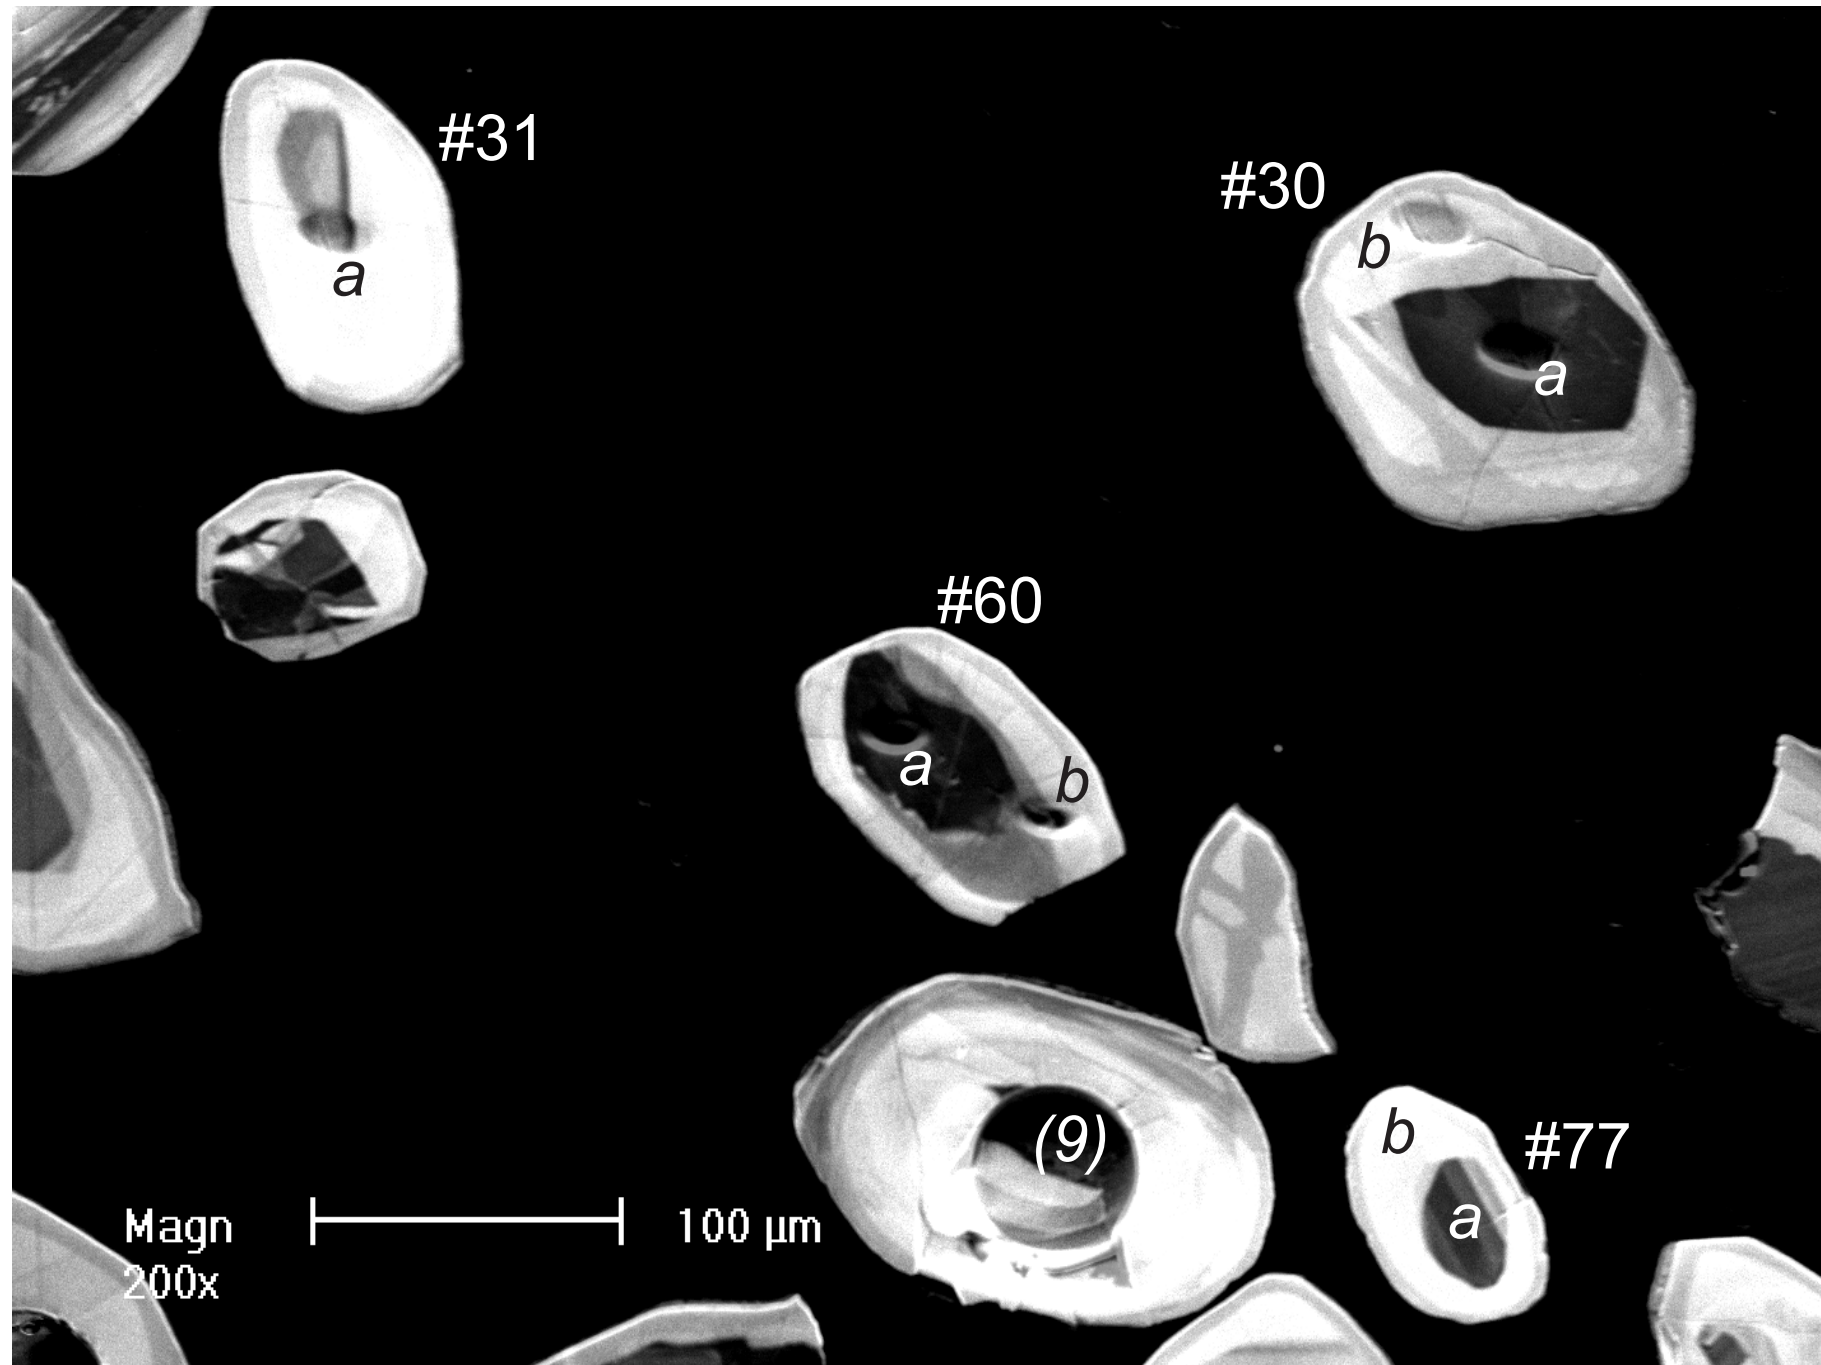

Figure S1 CL documentation of grains in Lew99-Ky

Ky-4B

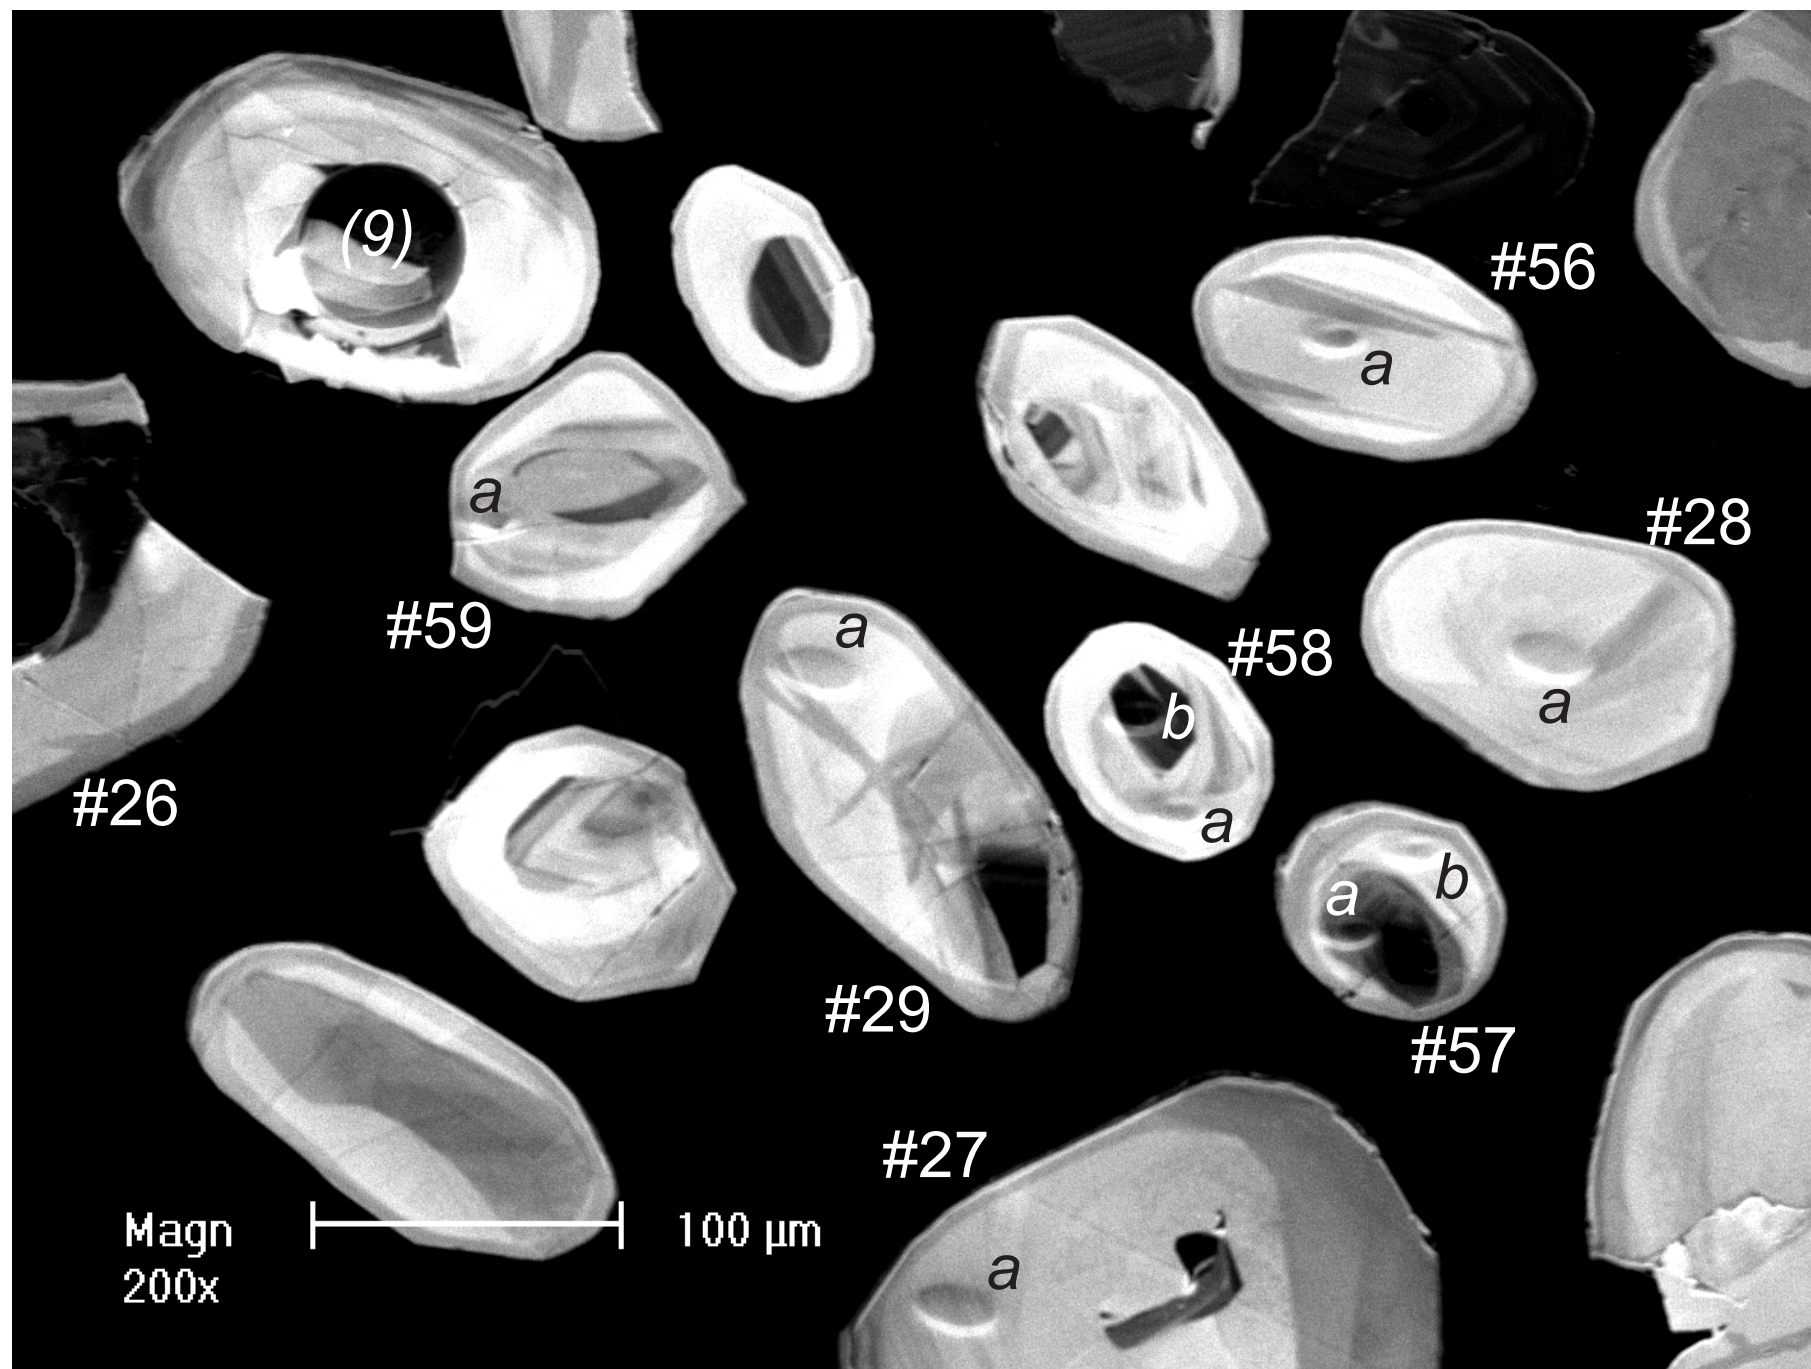

Figure S1 CL documentation of grains in Lew99-Ky



Ky-4C

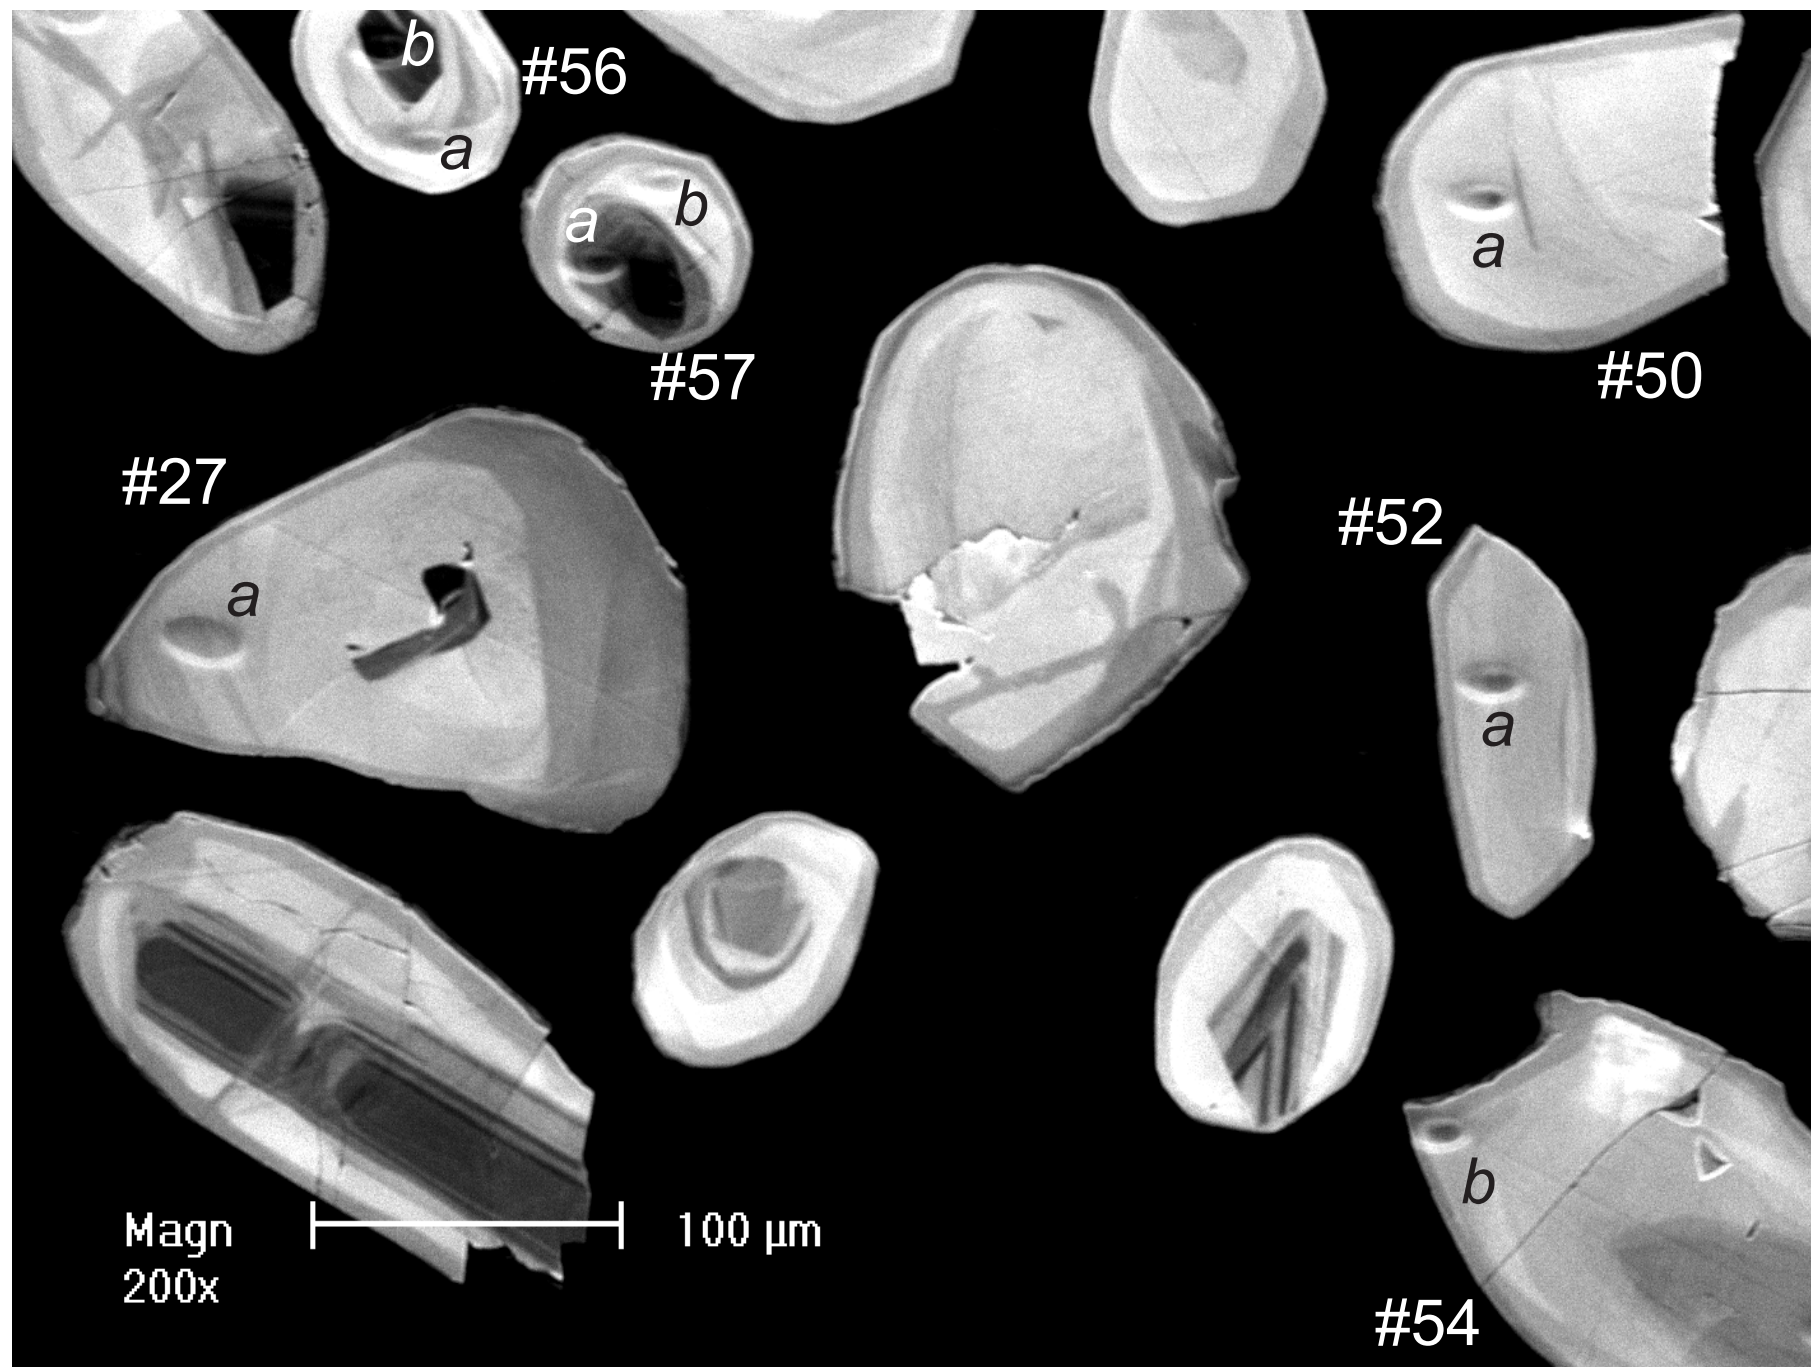

Figure S1 CL documentation of grains in Lew99-Ky



Ky-5A

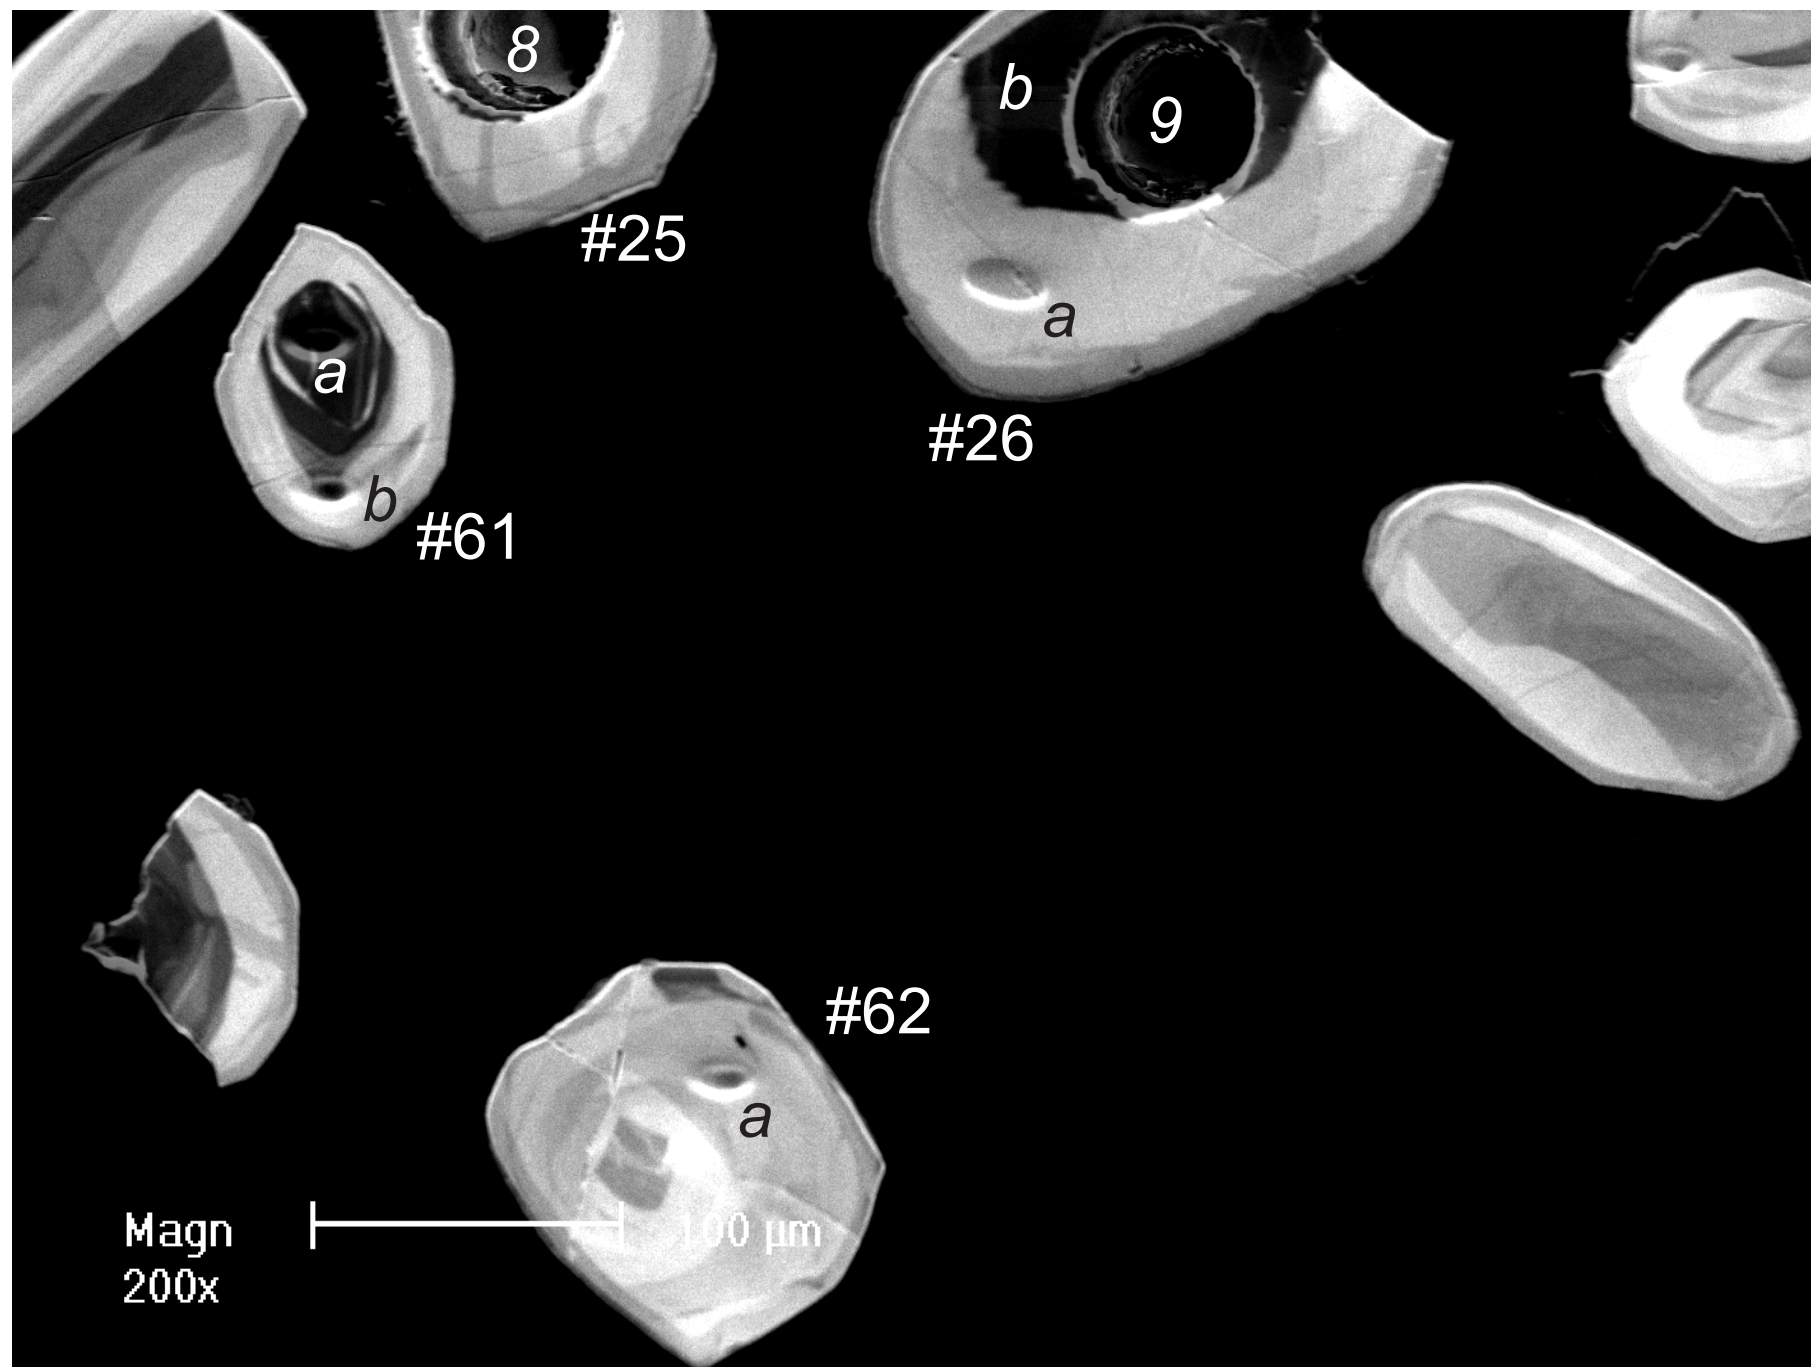

Figure S1 CL documentation of grains in Lew99-Ky

Ky-6A

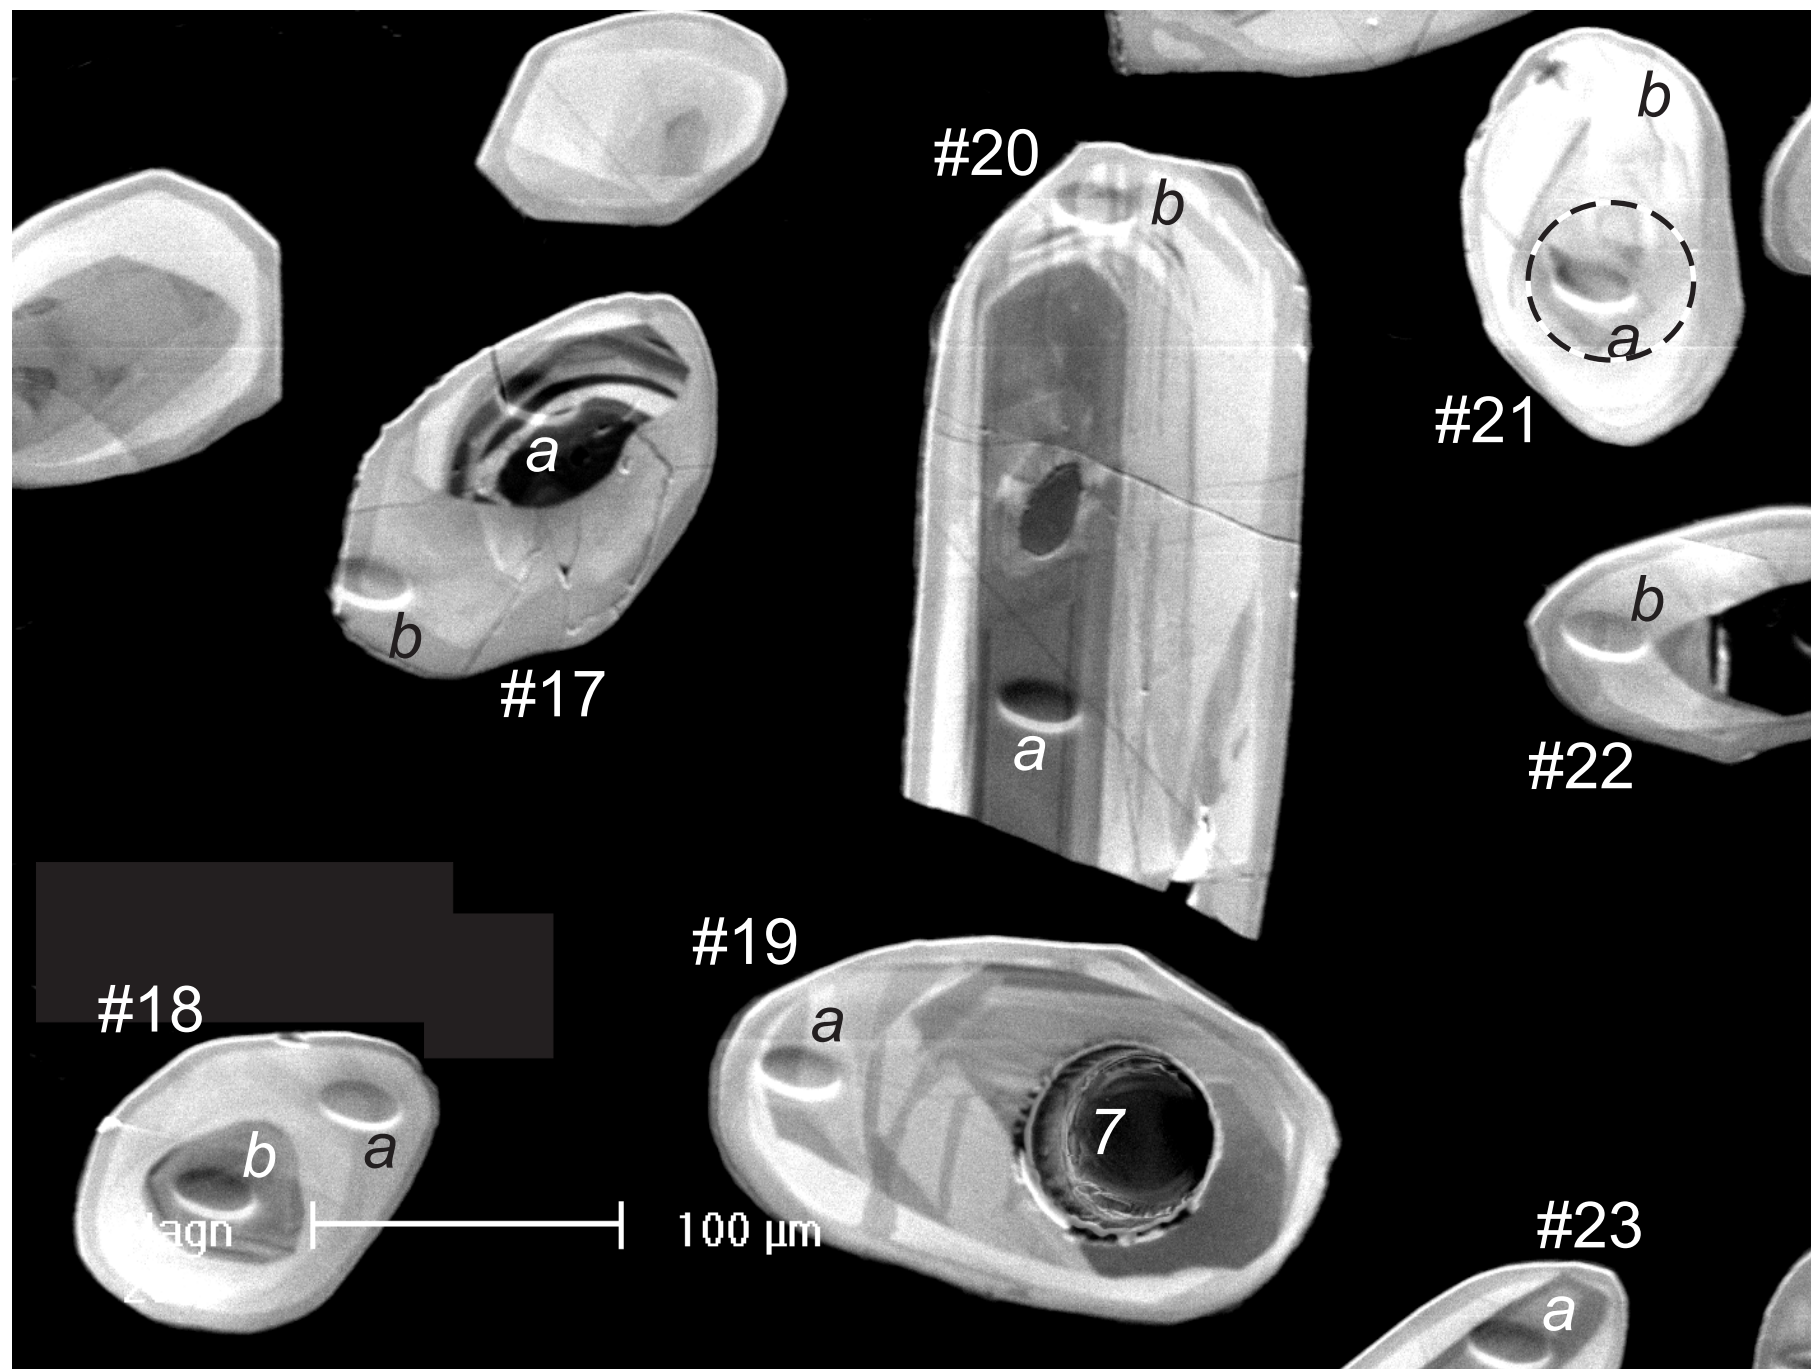

Figure S1 CL documentation of grains in Lew99-Ky

Ky-6B

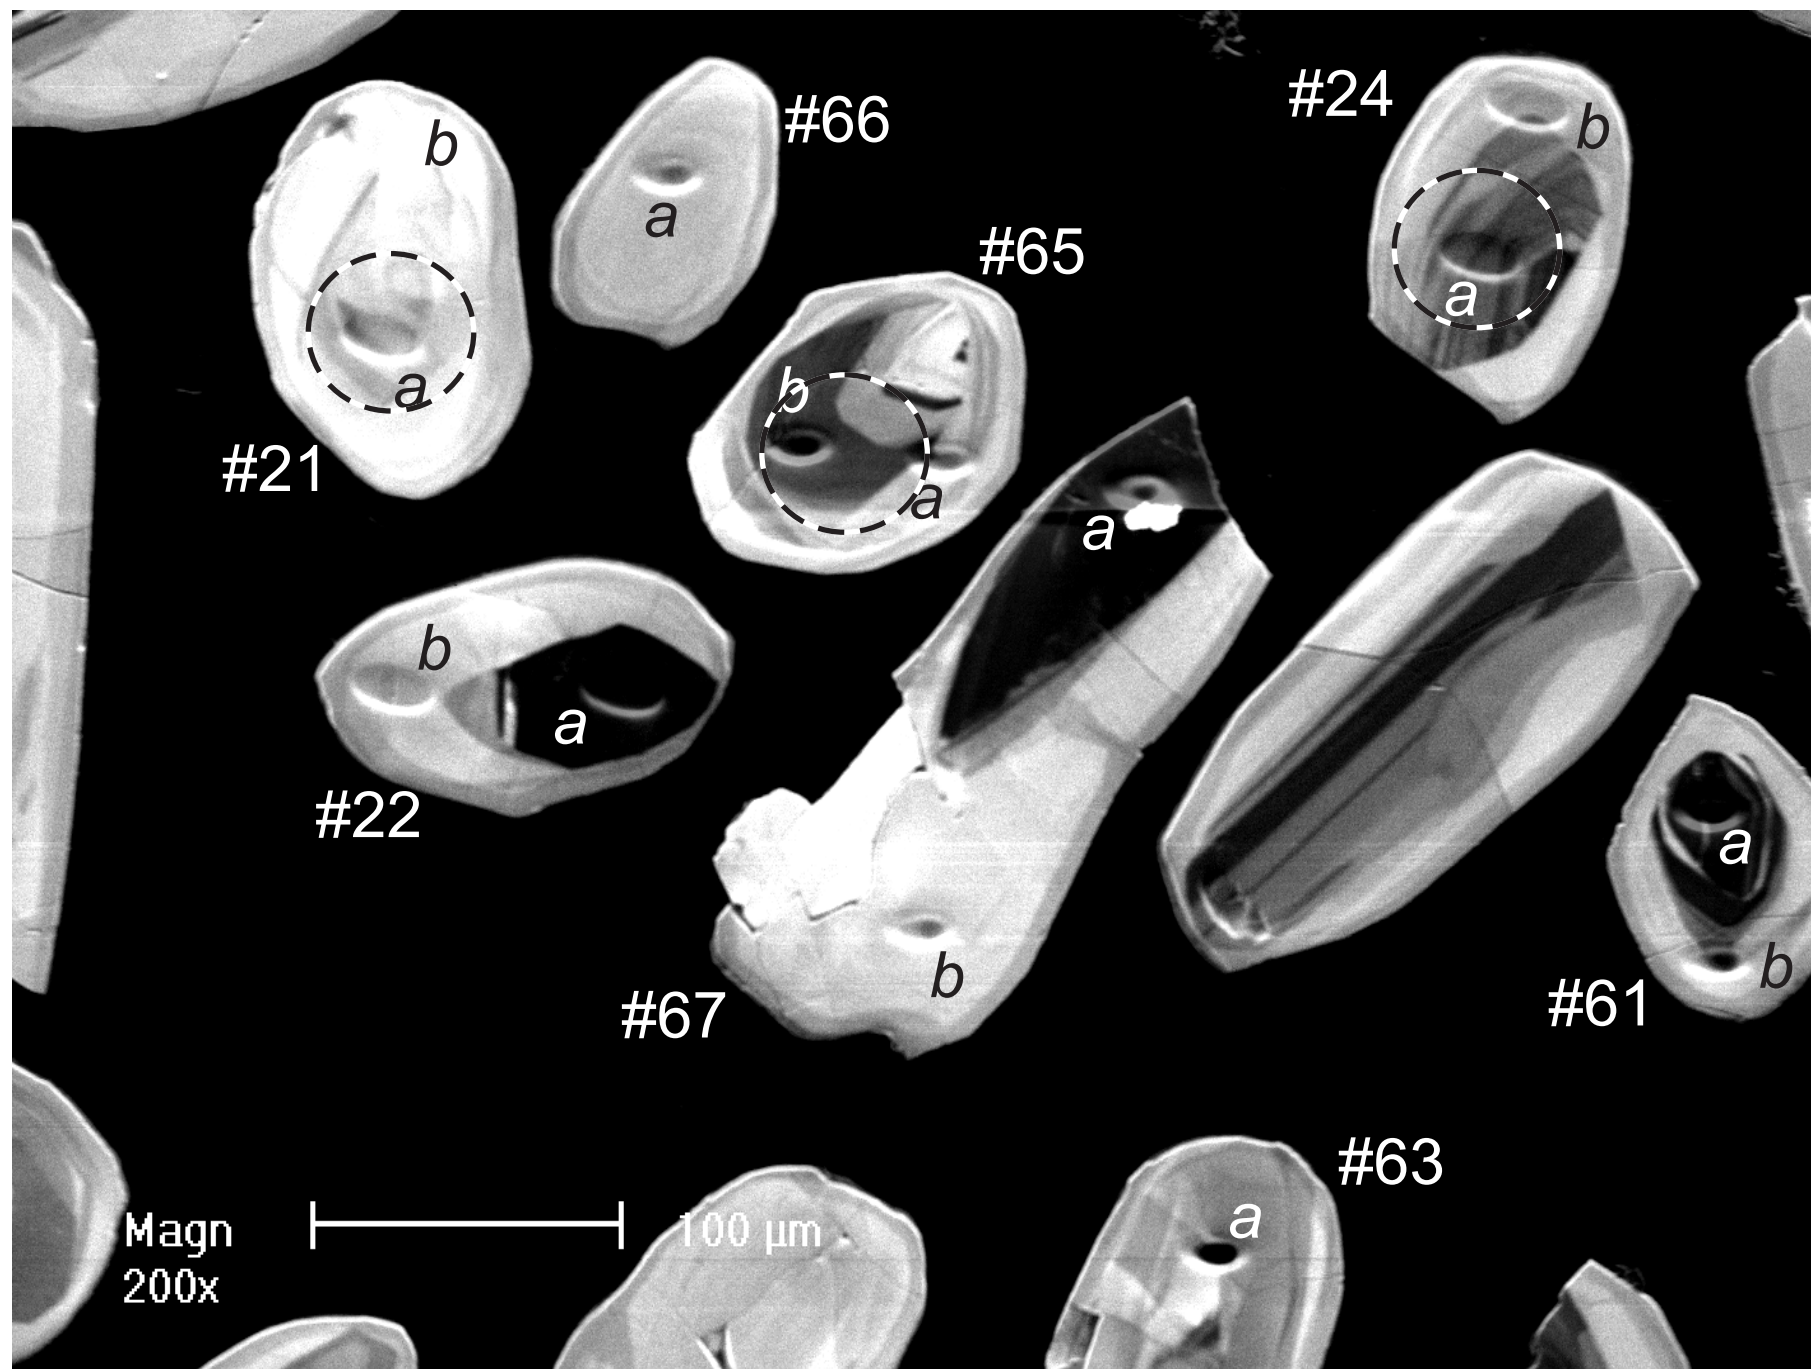

Figure S1 CL documentation of grains in Lew99-Ky



Ky-6C

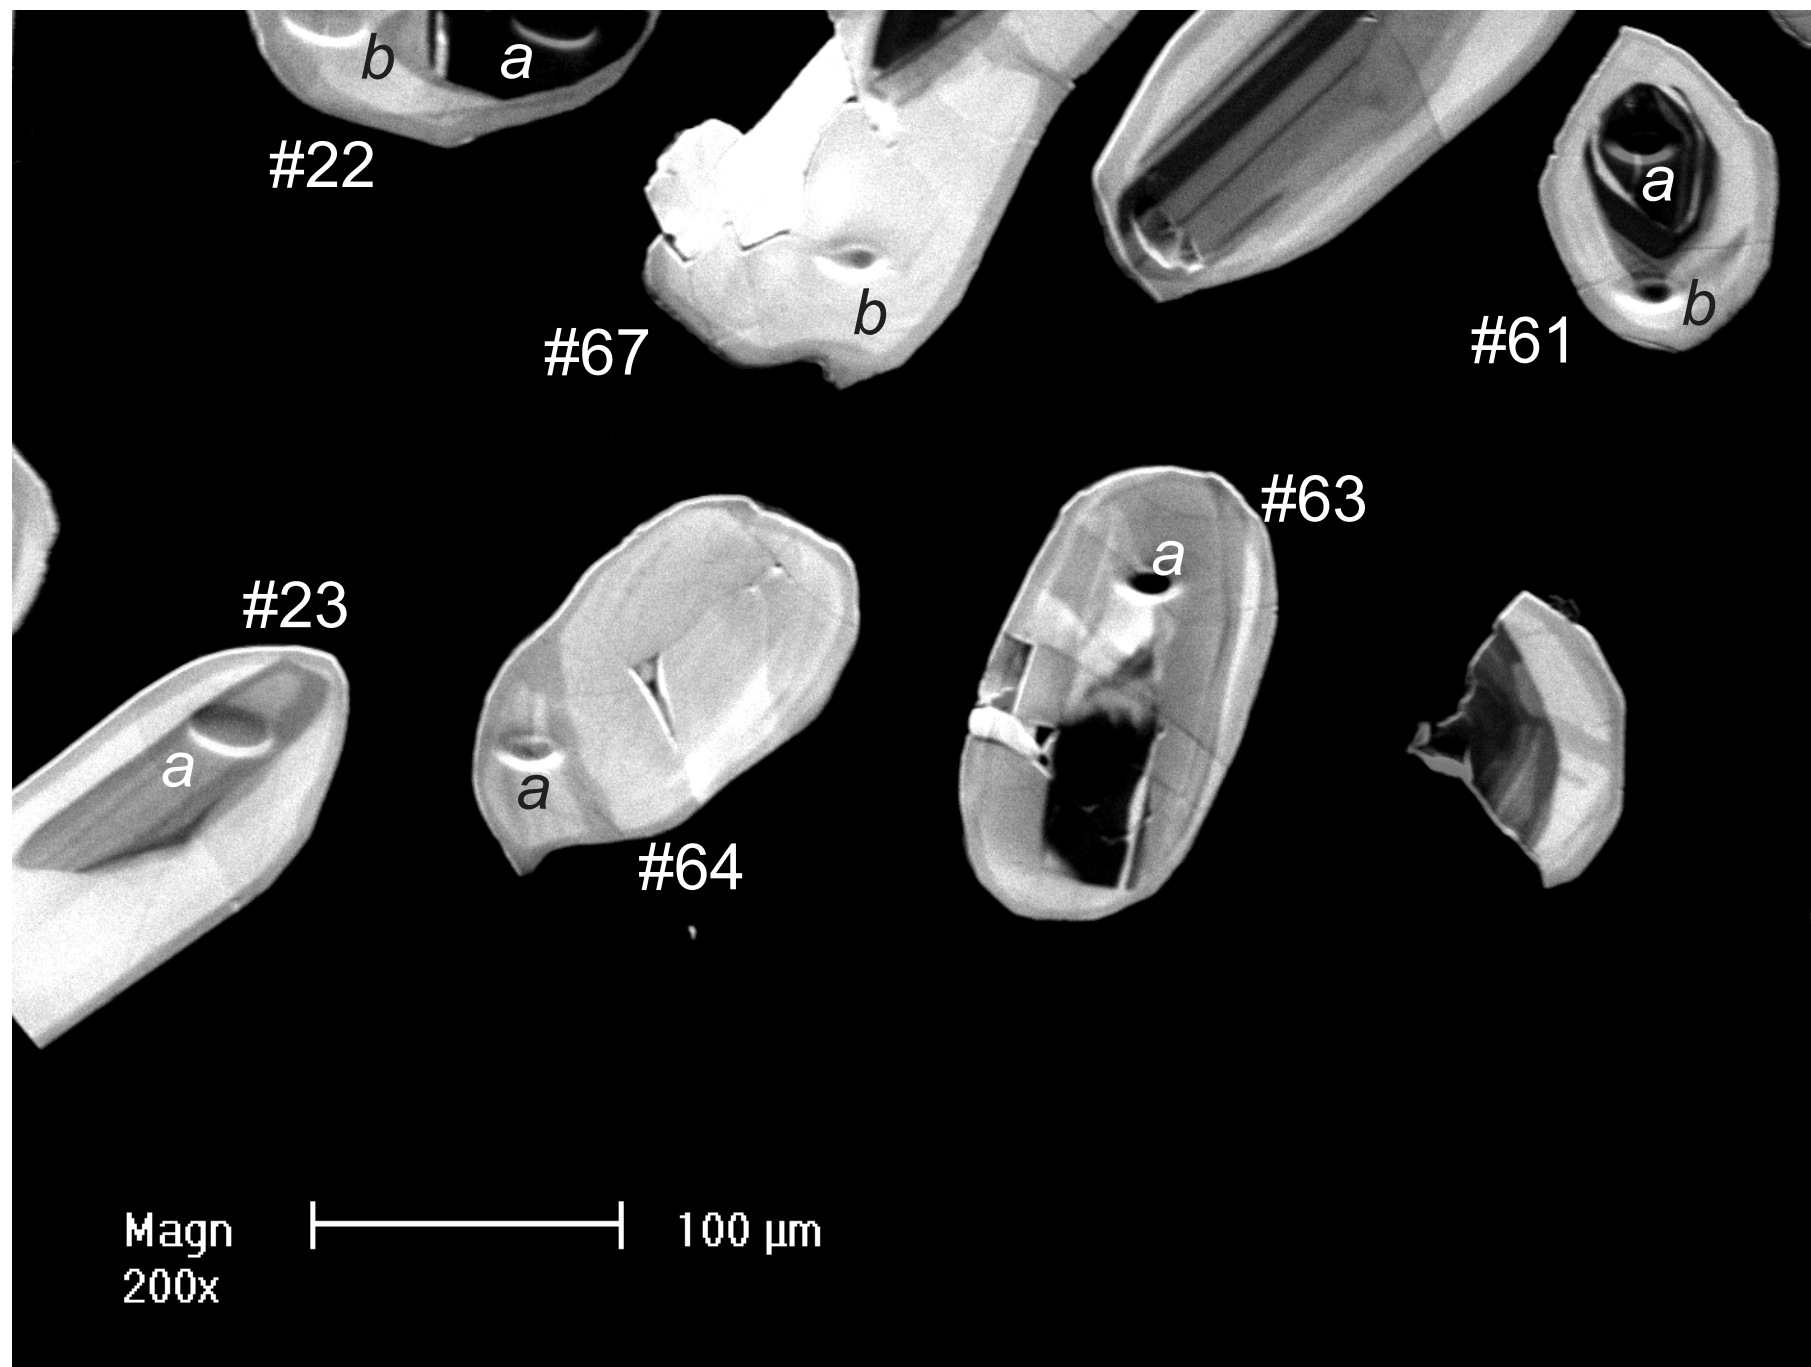

Figure S1 CL documentation of grains in Lew99-Ky



Ky-7A

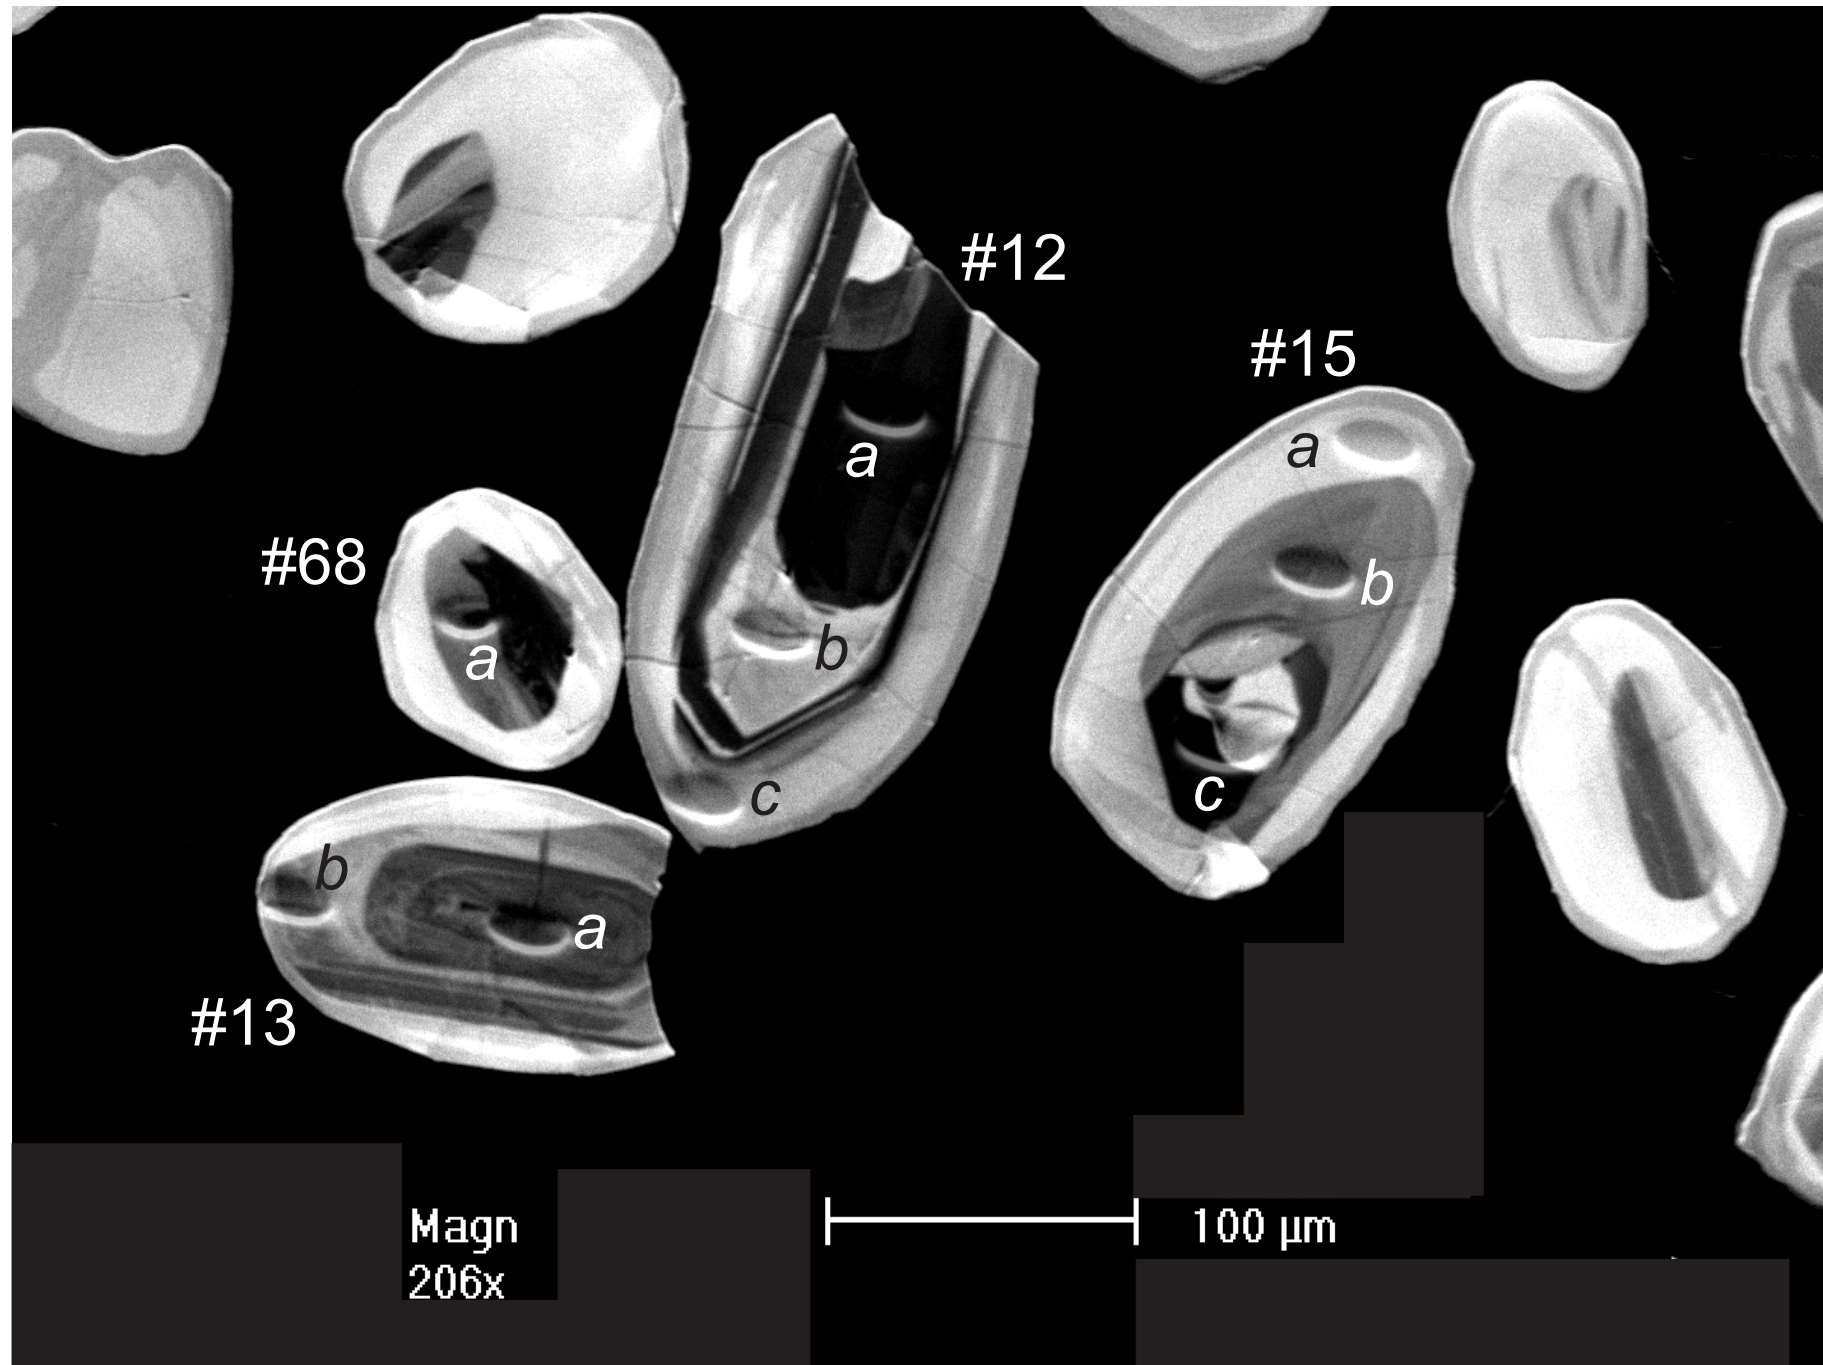

Figure S1 CL documentation of grains in Lew99-Ky

Ky-7B

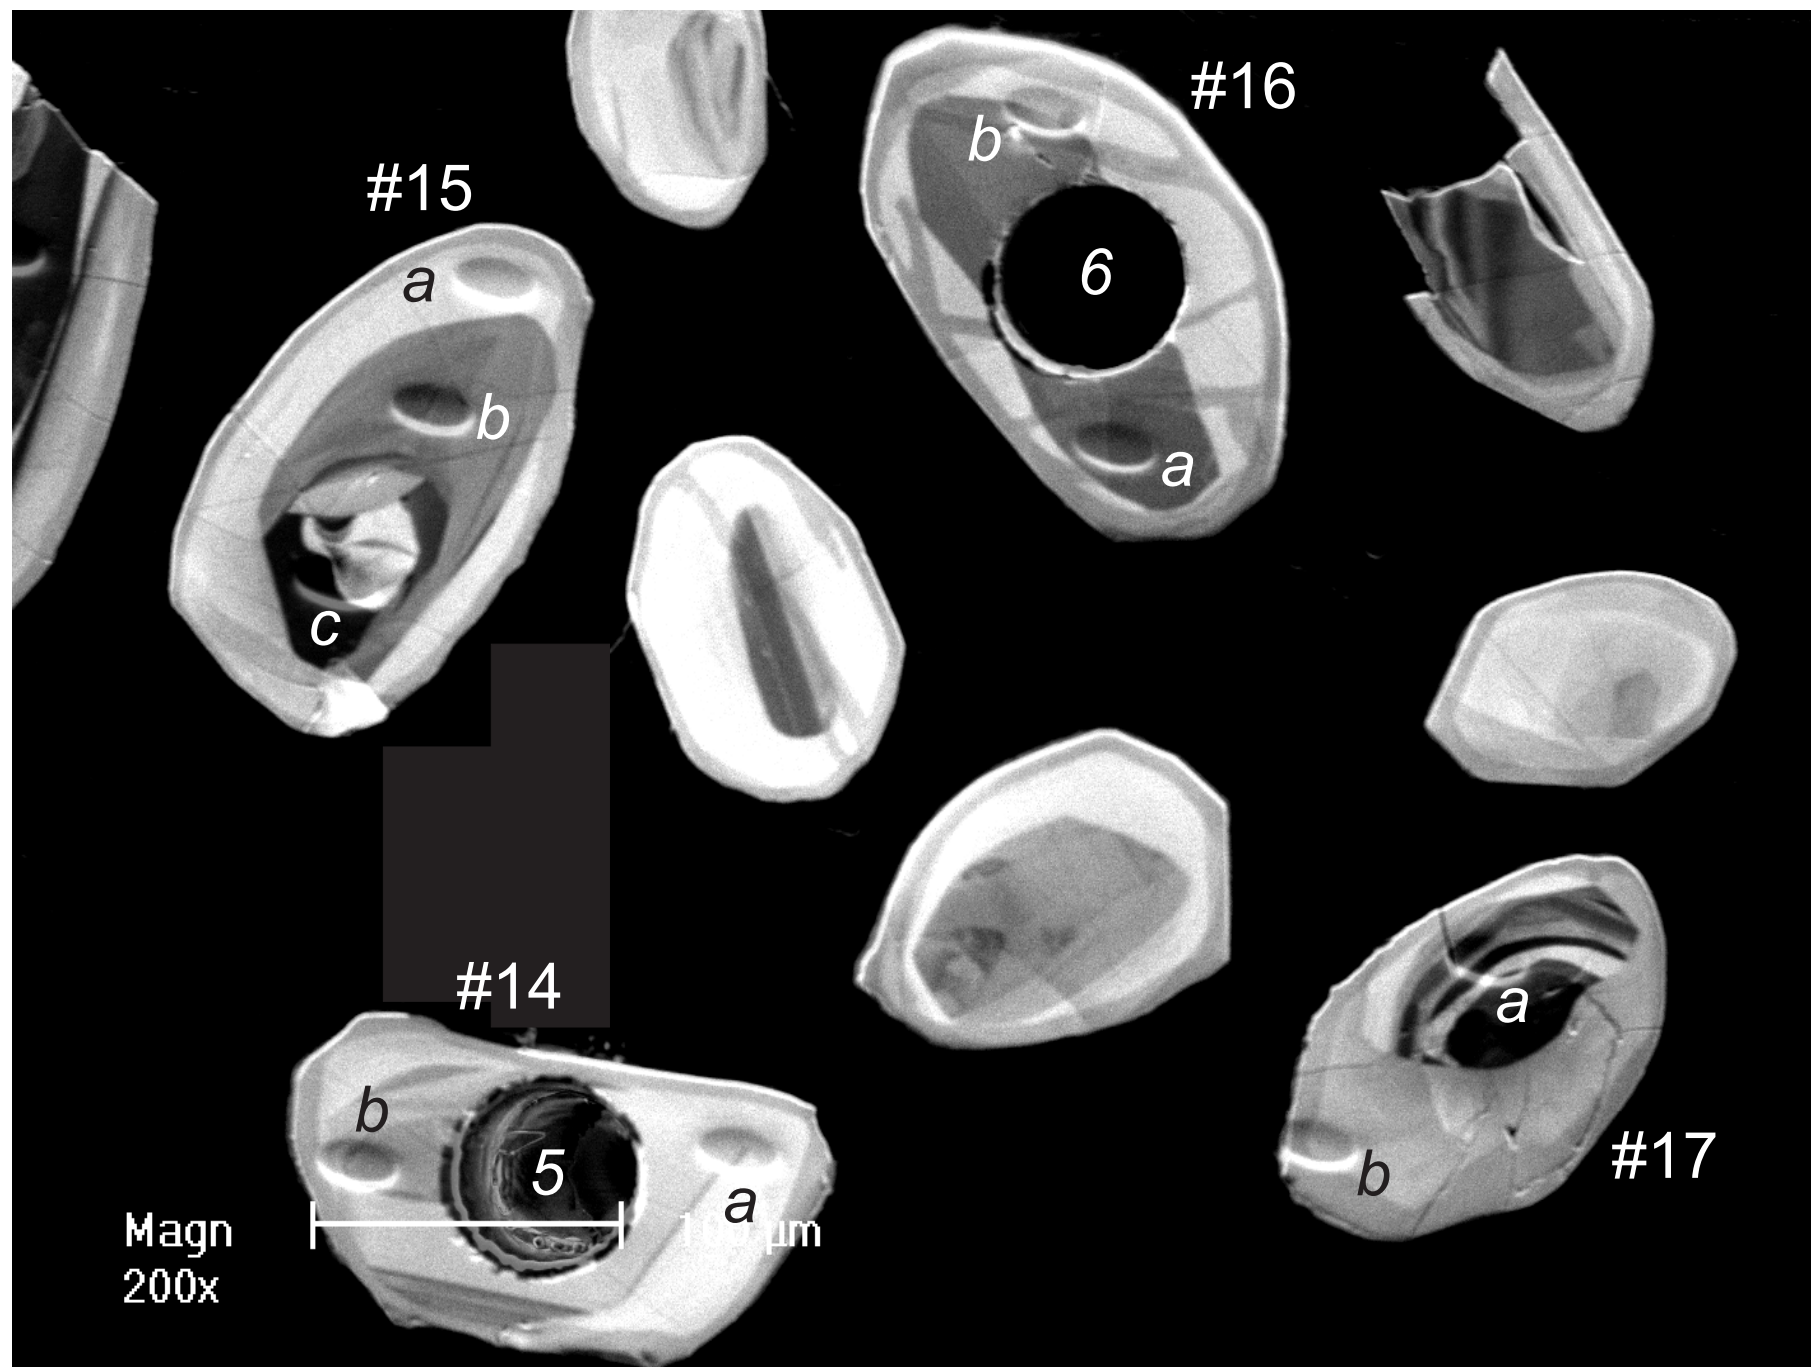

Figure S1 CL documentation of grains in Lew99-Ky

Ky-8A

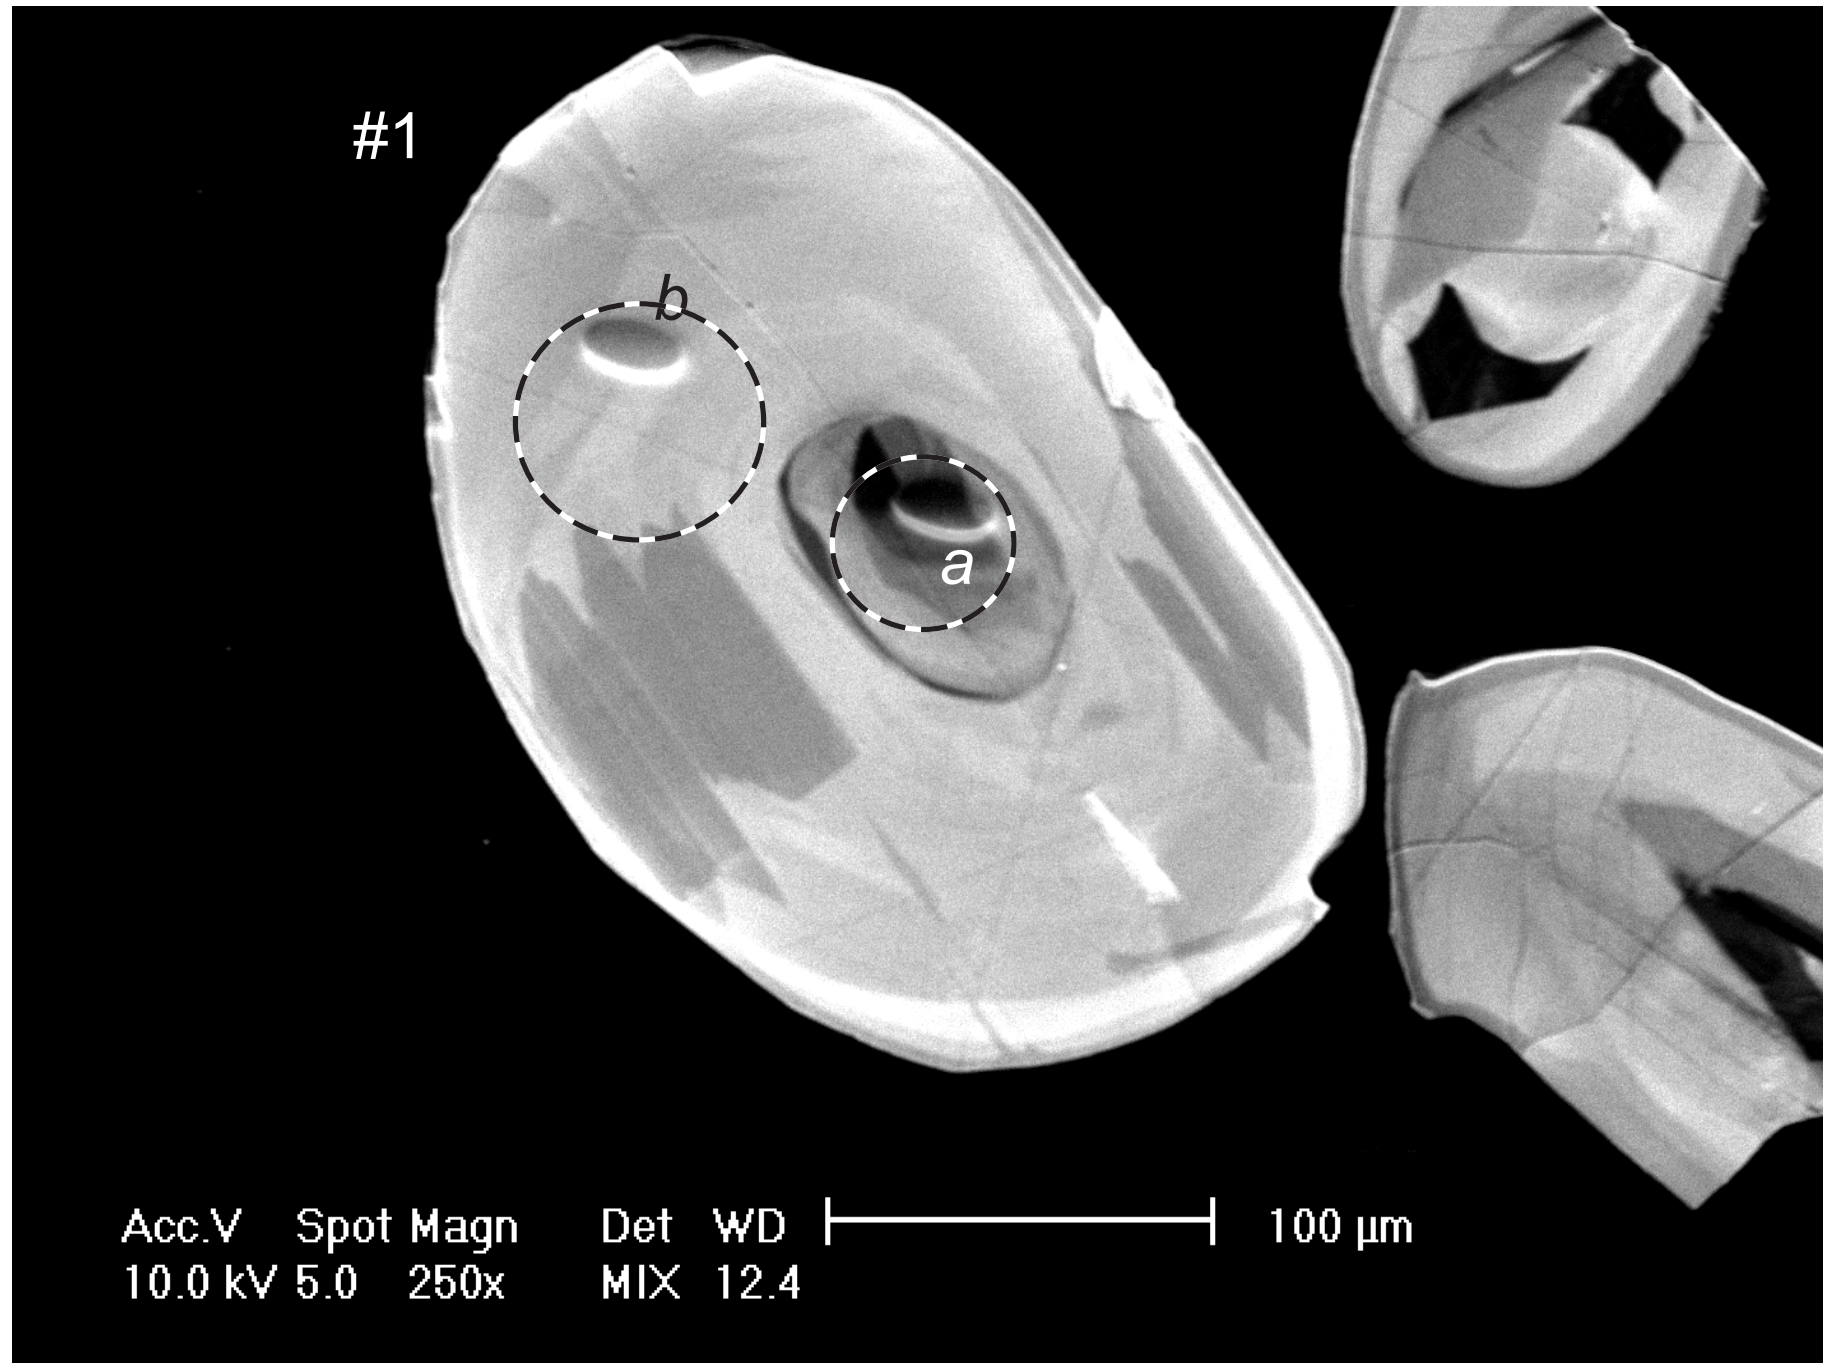

Figure S1 CL documentation of grains in Lew99-Ky



Ky-9A

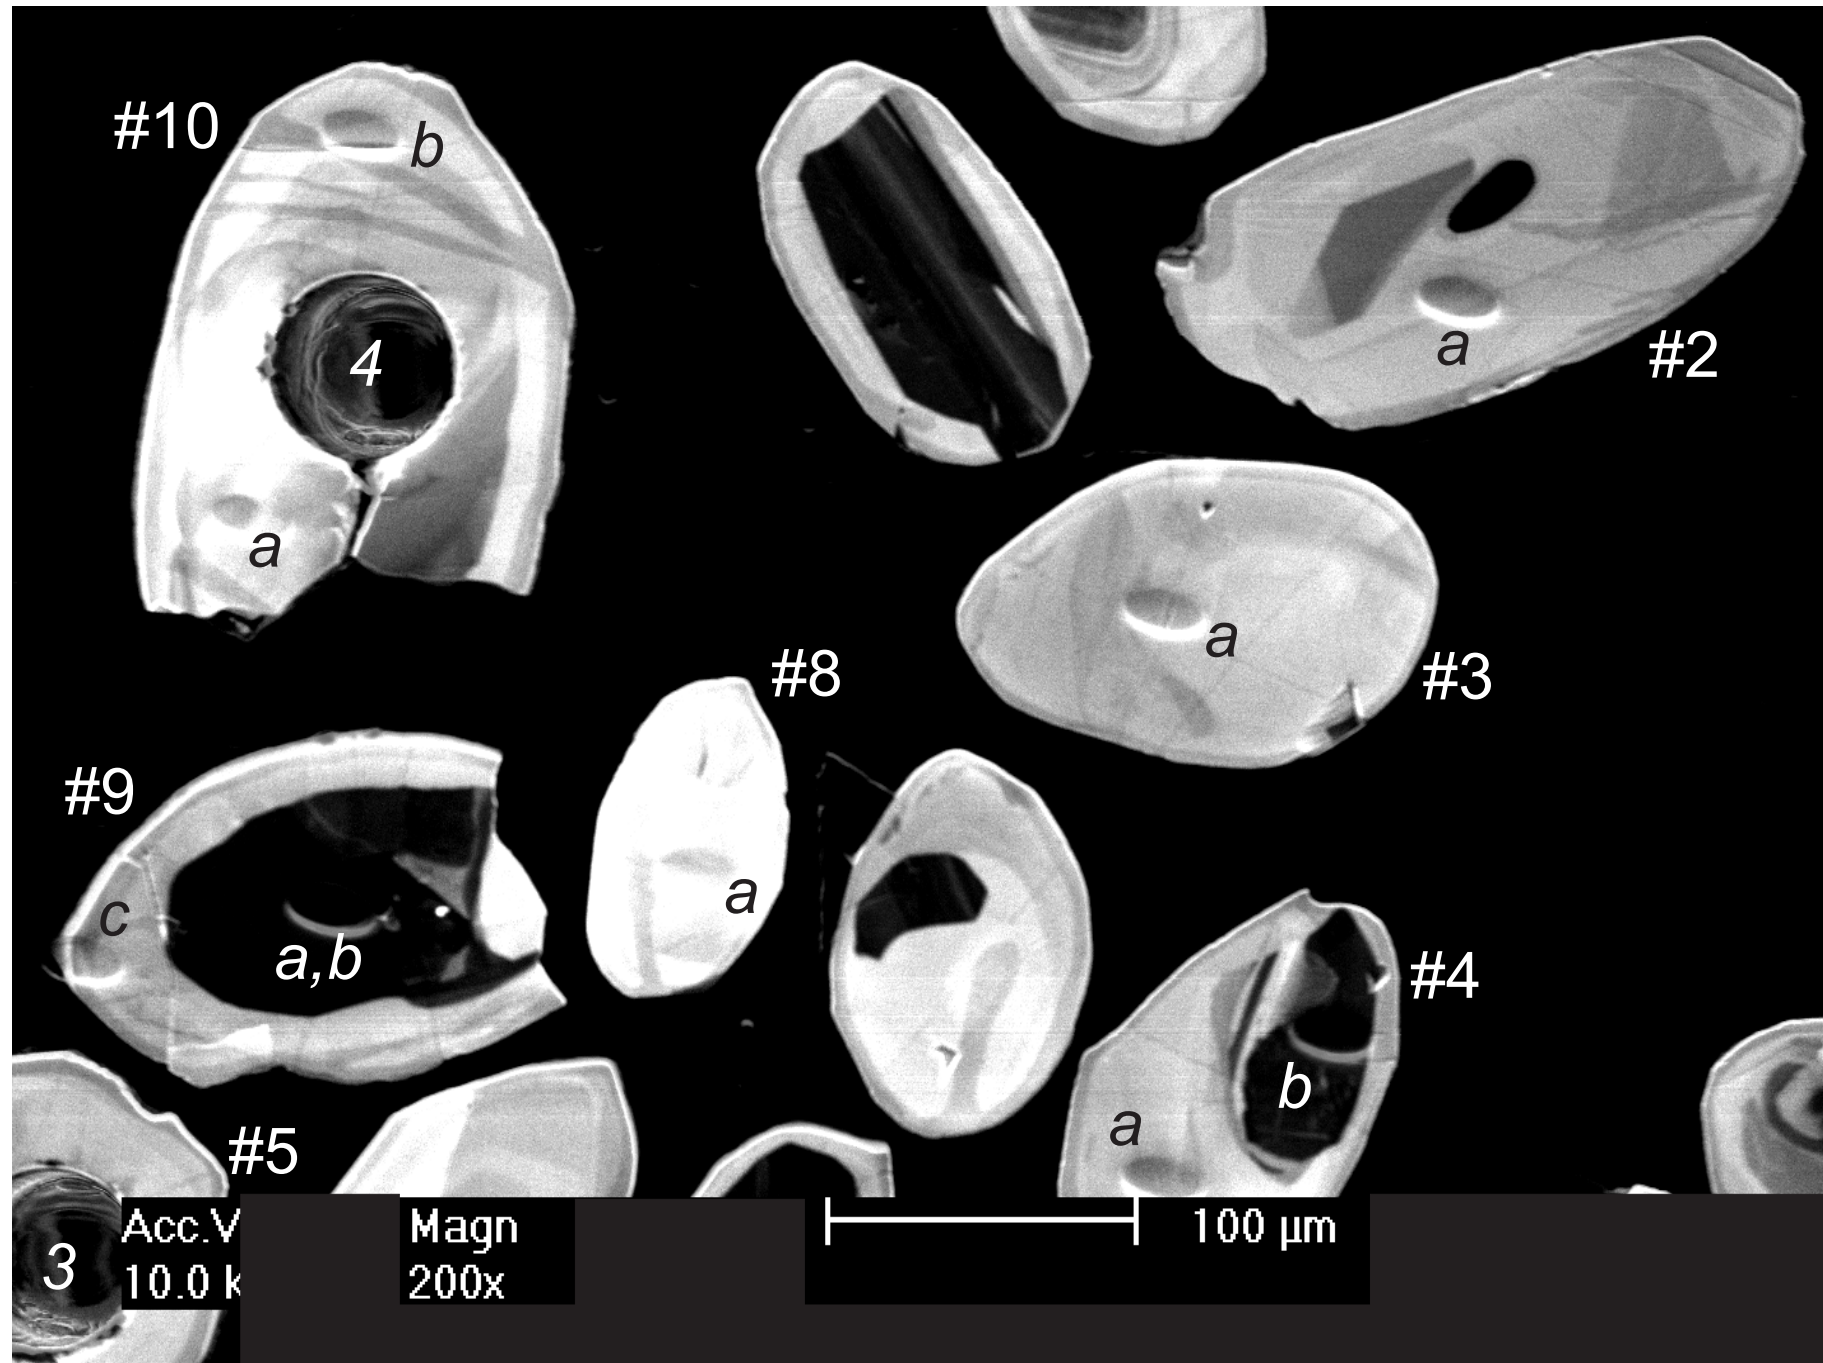

Figure S1 CL documentation of grains in Lew99-Ky



Ky-9B

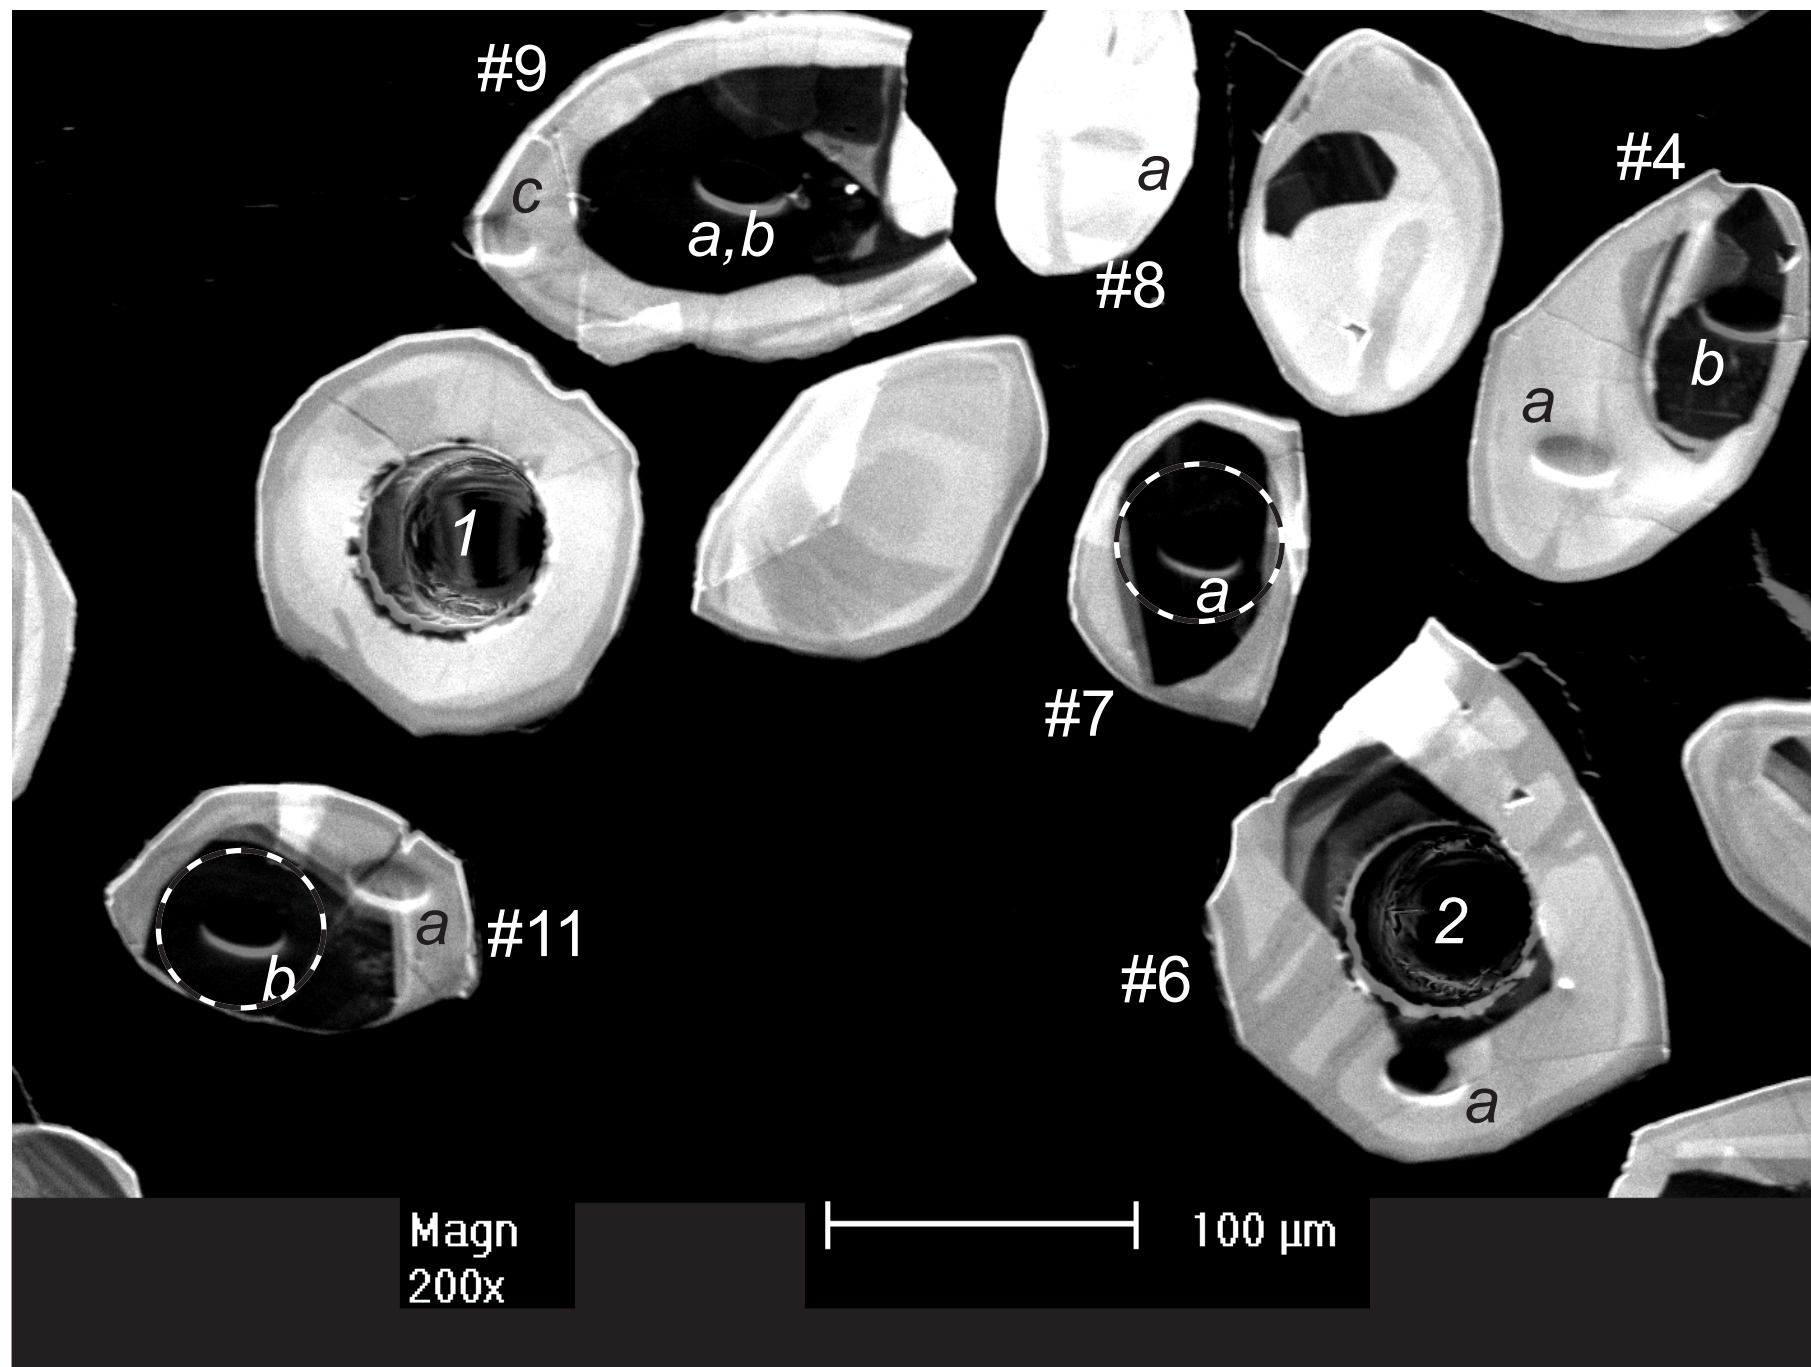

Figure S1 CL documentation of grains in Lew99-Ky
