# Supplementary material
Source: publisher figshare collection journal article supplement (https://geolsoc.figshare.com/articles/dataset/_/3454805)
Supplement: Supplementary file 3 [file 1]

Table S2. Concurrent Pb and Hf-Lu-Yb isotope data for zircons of Lewisian granulites

| Grain/spot# <sup>1</sup>                                                          | <sup>176</sup> Hf/ <sup>177</sup> Hf <sup>2</sup> | <sup>178</sup> Hf/ <sup>177</sup> Hf <sup>2</sup> | <sup>176</sup> Lu/ <sup>177</sup> Hf <sup>2</sup> | <sup>176</sup> Yb/ <sup>177</sup> Hf <sup>2</sup> | <sup>207</sup> Pb/ <sup>206</sup> Pb <sup>2</sup> | Age (Ma) <sup>3</sup><br>(measured) | Age (Ma) <sup>4</sup><br>(pref./min.) | <sup>176</sup> Hf/ <sup>177</sup> Hf <sub>i</sub> <sup>5</sup> | ε <sub>Hf</sub> (t) <sup>5</sup> | comment <sup>6</sup>   |
|-----------------------------------------------------------------------------------|---------------------------------------------------|---------------------------------------------------|---------------------------------------------------|---------------------------------------------------|---------------------------------------------------|-------------------------------------|---------------------------------------|----------------------------------------------------------------|----------------------------------|------------------------|
| <i>Lew99-Ky (n2822<sup>6</sup>) - granulite facies tonalite, Kylestrom</i>        |                                                   |                                                   |                                                   |                                                   |                                                   |                                     |                                       |                                                                |                                  |                        |
| Hf-1                                                                              | 0.280992 ± 19                                     | 1.467222 ± 45                                     | 0.000193 ± 04                                     | 0.0068 ± 02                                       | 0.1853 ± 08                                       | 2701 ± 07                           | 2850                                  | 0.280982                                                       | 0.86 ± 0.66                      | Single phase           |
| 6b (Hf-2)                                                                         | 0.281015 ± 17                                     | 1.467217 ± 42                                     | 0.000311 ± 10                                     | 0.0105 ± 03                                       | 0.1961 ± 07                                       | 2794 ± 06                           | 2850                                  | 0.280998                                                       | 1.44 ± 0.61                      | Core                   |
| 5 (Hf-3)                                                                          | 0.281000 ± 22                                     | 1.467259 ± 54                                     | 0.000188 ± 11                                     | 0.0067 ± 04                                       | 0.1832 ± 34                                       | 2682 ± 30                           | 2850                                  | 0.280990                                                       | 1.15 ± 0.77                      | Core                   |
| 10a (Hf-4)                                                                        | 0.281014 ± 28                                     | 1.467232 ± 32                                     | 0.000289 ± 40                                     | 0.0111 ± 19                                       | 0.1925 ± 08                                       | 2764 ± 07                           | 2850                                  | 0.280998                                                       | 1.43 ± 1.01                      | Single phase           |
| 14b (Hf-5)                                                                        | 0.281016 ± 15                                     | 1.467241 ± 39                                     | 0.000213 ± 12                                     | 0.0076 ± 05                                       | 0.1925 ± 18                                       | 2764 ± 15                           | 2850                                  | 0.281005                                                       | 1.67 ± 0.54                      | Single phase           |
| 16a (Hf-6)                                                                        | 0.280995 ± 27                                     | 1.467252 ± 64                                     | 0.000311 ± 98                                     | 0.0114 ± 36                                       | 0.1911 ± 15                                       | 2751 ± 13                           | 2850                                  | 0.280978                                                       | 0.74 ± 0.99                      | Core                   |
| 19a (Hf-7)                                                                        | 0.281018 ± 24                                     | 1.467277 ± 49                                     | 0.000359 ± 35                                     | 0.0116 ± 08                                       | 0.1945 ± 13                                       | 2781 ± 11                           | 2850                                  | 0.280999                                                       | 1.46 ± 0.84                      | Single phase           |
| 25a (Hf-8)                                                                        | 0.280980 ± 24                                     | 1.467200 ± 43                                     | 0.000258 ± 37                                     | 0.0088 ± 12                                       | 0.1896 ± 40                                       | 2739 ± 35                           | 2850                                  | 0.280966                                                       | 0.30 ± 0.86                      | Single phase           |
| 26b (Hf-9)                                                                        | 0.281025 ± 40                                     | 1.467193 ± 78                                     | 0.000551 ± 29                                     | 0.0185 ± 11                                       | 0.1829 ± 31                                       | 2680 ± 28                           | 2850                                  | 0.280995                                                       | 1.31 ± 1.44                      | Single phase           |
| 32a (Hf-10)                                                                       | 0.280861 ± 31                                     | 1.467230 ± 48                                     | 0.000272 ± 34                                     | 0.0107 ± 16                                       | 0.1884 ± 15                                       | 2728 ± 13                           | 2850                                  | 0.280846                                                       | -3.98 ± 1.12                     | Marked age, Hf zoning  |
| 35b (Hf-11)                                                                       | 0.281019 ± 25                                     | 1.467234 ± 50                                     | 0.000470 ± 45                                     | 0.0170 ± 15                                       | 0.1942 ± 04                                       | 2778 ± 03                           | 2850                                  | 0.280993                                                       | 1.27 ± 0.89                      | Core                   |
| 1a                                                                                | 0.280988 ± 22                                     | 1.467265 ± 46                                     | 0.000289 ± 20                                     | 0.0087 ± 06                                       | -                                                 | -                                   | 2829                                  | 0.280972                                                       | 0.04 ± 0.76                      | Core                   |
| 1b                                                                                | 0.280994 ± 16                                     | 1.467259 ± 32                                     | 0.000186 ± 06                                     | 0.0058 ± 02                                       | -                                                 | -                                   | 2501                                  | 0.280985                                                       | -7.12 ± 0.55                     | Rim                    |
| 7a                                                                                | 0.281020 ± 30                                     | 1.467270 ± 54                                     | 0.000736 ± 30                                     | 0.0214 ± 12                                       | -                                                 | -                                   | 2865                                  | 0.280979                                                       | 1.12 ± 1.09                      | Core                   |
| 11b                                                                               | 0.280988 ± 28                                     | 1.467260 ± 64                                     | 0.000605 ± 76                                     | 0.0182 ± 22                                       | -                                                 | -                                   | 2854                                  | 0.280955                                                       | -0.02 ± 1.00                     | Core                   |
| 21a                                                                               | 0.280988 ± 18                                     | 1.467292 ± 48                                     | 0.000335 ± 46                                     | 0.0087 ± 14                                       | -                                                 | -                                   | 2890                                  | 0.280970                                                       | 1.37 ± 0.61                      | Core                   |
| 24a                                                                               | 0.281000 ± 28                                     | 1.467259 ± 54                                     | 0.000527 ± 40                                     | 0.0131 ± 10                                       | -                                                 | -                                   | 2882                                  | 0.280971                                                       | 1.22 ± 1.01                      | Core                   |
| 41a                                                                               | 0.281015 ± 30                                     | 1.467275 ± 44                                     | 0.001370 ± 30                                     | 0.0376 ± 08                                       | -                                                 | -                                   | 2856                                  | 0.280940                                                       | -0.49 ± 1.04                     | Core, high REE inclns. |
| 65b                                                                               | 0.280970 ± 20                                     | 1.467258 ± 44                                     | 0.000259 ± 14                                     | 0.0072 ± 06                                       | -                                                 | -                                   | 2887                                  | 0.280955                                                       | 0.77 ± 0.69                      | Core                   |
| 71a                                                                               | 0.280985 ± 20                                     | 1.467263 ± 44                                     | 0.000983 ± 22                                     | 0.0257 ± 06                                       | -                                                 | -                                   | 2867                                  | 0.280931                                                       | -0.54 ± 0.70                     | Core                   |
| 72a                                                                               | 0.280999 ± 18                                     | 1.467213 ± 52                                     | 0.000582 ± 36                                     | 0.0154 ± 10                                       | -                                                 | -                                   | 2830                                  | 0.280968                                                       | -0.11 ± 0.63                     | Core                   |
| <i>Lew99-GE (n28216) - granulite facies tonalite, Geodh Eanruig (Scouriemore)</i> |                                                   |                                                   |                                                   |                                                   |                                                   |                                     |                                       |                                                                |                                  |                        |
| 1 (Hf-1)                                                                          | 0.281010 ± 20                                     | 1.467235 ± 30                                     | 0.000429 ± 30                                     | 0.0154 ± 10                                       | 0.1793 ± 14                                       | 2647 ± 12                           | 2850                                  | 0.280986                                                       | 1.02 ± 0.74                      | Core                   |
| 11 (Hf-2)                                                                         | 0.280970 ± 22                                     | 1.467234 ± 32                                     | 0.000094 ± 14                                     | 0.0034 ± 05                                       | 0.1683 ± 04                                       | 2541 ± 05                           | 2500                                  | 0.280965                                                       | -7.83 ± 0.79                     | Core                   |
| 14b (Hf-3)                                                                        | 0.280974 ± 20                                     | 1.467220 ± 46                                     | 0.000210 ± 10                                     | 0.0076 ± 03                                       | 0.1736 ± 50                                       | 2593 ± 48                           | 2850                                  | 0.280962                                                       | 0.17 ± 0.70                      | Single phase           |
| 14b (Hf-3b)                                                                       | 0.280955 ± 16                                     | 1.467227 ± 40                                     | 0.000186 ± 02                                     | 0.0068 ± 01                                       | 0.1720 ± 08                                       | 2577 ± 08                           | 2850                                  | 0.280945                                                       | -0.46 ± 0.56                     | Single phase           |
| 17b (Hf-4)                                                                        | 0.280929 ± 24                                     | 1.467208 ± 36                                     | 0.000494 ± 84                                     | 0.0161 ± 30                                       | 0.1999 ± 36                                       | 2825 ± 29                           | 2850                                  | 0.280902                                                       | -1.99 ± 0.87                     | Core                   |
| 16 (Hf-5)                                                                         | 0.280938 ± 24                                     | 1.467252 ± 30                                     | 0.000961 ± 162                                    | 0.0342 ± 59                                       | 0.2086 ± 12                                       | 2894 ± 10                           | 2900                                  | 0.280884                                                       | -1.45 ± 0.89                     | Core                   |
| 30c (Hf-6)                                                                        | 0.280963 ± 16                                     | 1.467243 ± 36                                     | 0.000232 ± 24                                     | 0.0084 ± 11                                       | 0.2005 ± 28                                       | 2831 ± 22                           | 2850                                  | 0.280950                                                       | -0.27 ± 0.57                     | Single phase           |
| 28a (Hf-7)                                                                        | 0.280986 ± 18                                     | 1.467255 ± 42                                     | 0.000185 ± 10                                     | 0.0064 ± 03                                       | 0.1822 ± 48                                       | 2673 ± 43                           | 2850                                  | 0.280976                                                       | 0.66 ± 0.66                      | Core                   |
| 28a (Hf-7b)                                                                       | 0.280955 ± 22                                     | 1.467201 ± 34                                     | 0.000258 ± 08                                     | 0.0091 ± 03                                       | 0.1931 ± 14                                       | 2769 ± 11                           | 2850                                  | 0.280941                                                       | -0.58 ± 0.79                     | Core                   |
| 31a (Hf-8)                                                                        | 0.281022 ± 30                                     | 1.467226 ± 38                                     | 0.001789 ± 72                                     | 0.0642 ± 26                                       | 0.1959 ± 10                                       | 2793 ± 09                           | 2950                                  | 0.280921                                                       | 1.01 ± 1.09                      | Core                   |
| 15 (Hf-9)                                                                         | 0.280980 ± 24                                     | 1.467239 ± 42                                     | 0.000287 ± 60                                     | 0.0101 ± 21                                       | 0.1926 ± 16                                       | 2765 ± 14                           | 2850                                  | 0.280964                                                       | 0.23 ± 0.87                      | Core                   |
| 87a (Hf-10)                                                                       | 0.280966 ± 16                                     | 1.467214 ± 38                                     | 0.000309 ± 18                                     | 0.0110 ± 05                                       | 0.1962 ± 12                                       | 2795 ± 10                           | 2850                                  | 0.280949                                                       | -0.32 ± 0.57                     | Single phase           |

| Grain/spot# <sup>1</sup> | <sup>176</sup> Hf/ <sup>177</sup> Hf <sup>2</sup> | <sup>178</sup> Hf/ <sup>177</sup> Hf <sup>2</sup> | <sup>176</sup> Lu/ <sup>177</sup> Hf <sup>2</sup> | <sup>176</sup> Yb/ <sup>177</sup> Hf <sup>2</sup> | <sup>207</sup> Pb/ <sup>206</sup> Pb <sup>2</sup> | Age (Ma) <sup>3</sup><br>(measured) | Age (Ma) <sup>4</sup><br>(pref./min.) | <sup>176</sup> Hf/ <sup>177</sup> Hf <sub>i</sub> <sup>5</sup> | ε <sub>Hf</sub> (t) <sup>5</sup> | comment <sup>6</sup>   |
|--------------------------|---------------------------------------------------|---------------------------------------------------|---------------------------------------------------|---------------------------------------------------|---------------------------------------------------|-------------------------------------|---------------------------------------|----------------------------------------------------------------|----------------------------------|------------------------|
| 20b (Hf-11)              | 0.280967 ± 24                                     | 1.467248 ± 34                                     | 0.000135 ± 06                                     | 0.0046 ± 02                                       | 0.1738 ± 28                                       | 2594 ± 26                           | 2500                                  | 0.280960                                                       | -8.02 ± 0.86                     | Core                   |
| 24                       | 0.280952 ± 14                                     | 1.467234 ± 36                                     | 0.000282 ± 12                                     | 0.0071 ± 03                                       | -                                                 | -                                   | 3032                                  | 0.280936                                                       | 3.46 ± 0.50                      | Core                   |
| 49                       | 0.280952 ± 12                                     | 1.467230 ± 50                                     | 0.000228 ± 10                                     | 0.0060 ± 02                                       | -                                                 | -                                   | 2898                                  | 0.280939                                                       | 0.47 ± 0.84                      | Core                   |
| 61                       | 0.280980 ± 18                                     | 1.467260 ± 46                                     | 0.000356 ± 04                                     | 0.0096 ± 02                                       | -                                                 | -                                   | 2966                                  | 0.280960                                                       | 2.78 ± 0.63                      | Core                   |
| 71a                      | 0.280923 ± 10                                     | 1.467273 ± 28                                     | 0.000936 ± 26                                     | 0.0249 ± 08                                       | -                                                 | -                                   | 3043                                  | 0.280868                                                       | 1.32 ± 0.34                      | Core                   |
| 71a-2                    | 0.280909 ± 20                                     | 1.467245 ± 58                                     | 0.000725 ± 12                                     | 0.0192 ± 04                                       | -                                                 | -                                   | 3043                                  | 0.280867                                                       | 1.28 ± 0.68                      | Core (repeat analysis) |
| 72a                      | 0.280950 ± 16                                     | 1.467350 ± 52                                     | 0.000570 ± 26                                     | 0.0140 ± 06                                       | -                                                 | -                                   | 2992                                  | 0.280917                                                       | 1.89 ± 0.55                      | Core                   |
| 84b                      | 0.280968 ± 20                                     | 1.467253 ± 40                                     | 0.000199 ± 06                                     | 0.0048 ± 02                                       | -                                                 | -                                   | 2929                                  | 0.280956                                                       | 1.81 ± 0.69                      | Core                   |

Notes

<sup>1</sup> Grain number and spot designation refers to SIMS U-Pb analyses documented in Table S1 (with the exception of Lew99-Ky analysis Hf-1 for which no complementary SIMS analysis was performed).

Where accompanied by text in parentheses, the latter indicates grain numbers assigned during concurrent Pb and Hf-Lu-Yb isotope measurements.

<sup>2</sup> All ratios are quoted at 2σ precision.

<sup>3</sup> Age calculated from <sup>207</sup>Pb/<sup>206</sup>Pb ratios determined concurrently with Hf-Lu-Yb isotope measurements.

<sup>4</sup> Age calculated using either preferred/minimum assigned age for grains based on evaluation of SIMS and, where undertaken, LA-ICPMS analyses (see text for criteria).

<sup>5</sup> Initial <sup>176</sup>Hf/<sup>177</sup>Hf and ε<sub>Hf</sub> values were calculated using the preferred/minimum crystallisation ages (see text), the <sup>176</sup>Lu decay constant of Scherer et al. (2001) and the chondrite values of Blichert-Toft and Albarède (1997). Errors in ε<sub>Hf</sub> were derived from the 2σ uncertainty for initial <sup>176</sup>Hf/<sup>177</sup>Hf, which itself incorporates uncertainty in the crystallisation age, the <sup>176</sup>Lu decay constant and in the measured <sup>176</sup>Hf/<sup>177</sup>Hf and <sup>176</sup>Lu/<sup>177</sup>Hf.

<sup>6</sup> Simplified description of analysed volume differs slightly from Table S1 due to larger sampling volume of LA-ICPMS analyses.
