# Supplementary material
Source: publisher figshare collection journal article supplement (https://geolsoc.figshare.com/articles/dataset/_/3454805)
Supplement: Supplementary file 4 [file 1]

Table S1. SIMS U-Th-Pb data from Lewisian granulites

| Grain/<br>spot # <sup>1</sup>                                               | Growth <sup>2</sup> | CL char <sup>3</sup> | Image <sup>4</sup> | [U]<br>ppm | [Th]<br>ppm | [Pb]<br>ppm | Th/U<br>meas | <sup>206</sup> Pb/ <sup>204</sup> Pb<br>meas | f <sub>206</sub> % <sup>5</sup> | <sup>207</sup> Pb/<br><sup>206</sup> Pb | ±σ    | <sup>207</sup> Pb/<br><sup>235</sup> U | ±σ     | <sup>206</sup> Pb/<br><sup>238</sup> U | ±σ     | ρ    | Disc. %<br>conv. | Disc. %<br>2σ lim. | <sup>207</sup> Pb/<br><sup>235</sup> U | ±σ   | <sup>206</sup> Pb/<br><sup>238</sup> U | ±σ   | <sup>207</sup> Pb/<br><sup>206</sup> Pb | ±σ |
|-----------------------------------------------------------------------------|---------------------|----------------------|--------------------|------------|-------------|-------------|--------------|----------------------------------------------|---------------------------------|-----------------------------------------|-------|----------------------------------------|--------|----------------------------------------|--------|------|------------------|--------------------|----------------------------------------|------|----------------------------------------|------|-----------------------------------------|----|
| <i>Lew99-Ky (n2822<sup>6</sup>) - granulite facies tonalite, Kylestroma</i> |                     |                      |                    |            |             |             |              |                                              |                                 |                                         |       |                                        |        |                                        |        |      |                  |                    |                                        |      |                                        |      |                                         |    |
| 9c                                                                          | r                   | B                    | 9A                 | 27.1       | 13.5        | 15.7        | 0.50         | 687                                          | 2.72                            | 0.1605                                  | 1.22  | 9.22                                   | 2.79   | 0.4725                                 | 0.9769 | 0.35 | 13.3             | 1.6                | 2360                                   | 26   | 2494                                   | 20   | 2246                                    | 45 |
| 55                                                                          | cs                  | D                    | 3A                 | 595.0      | 8.5         | 194.1       | 0.01         | 2870                                         | 0.65                            | 0.1583                                  | 1.13  | 5.98                                   | 2.16   | 0.2819                                 | 1.8104 | 0.84 | -37.2            | -31.8              | 1973                                   | 19   | 1601                                   | 26   | 2390                                    | 20 |
| 30b                                                                         | r                   | B                    | 4A                 | 18.0       | 7.4         | 10.6        | 0.41         | 1939                                         | 0.96                            | 0.1635                                  | 1.31  | 10.12                                  | 1.97   | 0.4676                                 | 0.9901 | 0.50 | 2.5              |                    | 2446                                   | 18   | 2473                                   | 20   | 2423                                    | 29 |
| 17b                                                                         | r                   | B                    | 6A                 | 25.9       | 16.2        | 16.2        | 0.63         | 2049                                         | 0.91                            | 0.1633                                  | 1.16  | 10.28                                  | 1.69   | 0.4746                                 | 0.9690 | 0.57 | 3.9              |                    | 2460                                   | 16   | 2504                                   | 20   | 2425                                    | 23 |
| 54b                                                                         | r                   | B                    | 2A                 | 28.8       | 21.0        | 18.4        | 0.73         | 1662                                         | 1.13                            | 0.1649                                  | 1.08  | 10.36                                  | 1.55   | 0.4776                                 | 0.7509 | 0.48 | 4.5              |                    | 2467                                   | 14   | 2517                                   | 16   | 2427                                    | 23 |
| 18a                                                                         | r                   | B                    | 6A                 | 22.4       | 11.1        | 13.4        | 0.50         | 5248                                         | 0.36                            | 0.1610                                  | 1.20  | 10.20                                  | 1.68   | 0.4664                                 | 1.0294 | 0.61 | 1.3              |                    | 2453                                   | 16   | 2468                                   | 21   | 2440                                    | 22 |
| 10b                                                                         | r                   | B                    | 9A                 | 14.9       | 10.1        | 9.2         | 0.67         | 1512                                         | 1.24                            | 0.1670                                  | 1.50  | 10.10                                  | 2.11   | 0.4617                                 | 1.0090 | 0.48 | 0.3              |                    | 2444                                   | 20   | 2447                                   | 21   | 2442                                    | 31 |
| 59                                                                          | r                   | B                    | 4B                 | 24.3       | 19.3        | 15.8        | 0.79         | 2433                                         | 0.77                            | 0.1643                                  | 1.16  | 10.46                                  | 1.54   | 0.4770                                 | 0.7823 | 0.51 | 3.4              |                    | 2477                                   | 14   | 2514                                   | 16   | 2446                                    | 22 |
| 64                                                                          | r                   | M                    | 6C                 | 25.3       | 19.6        | 16.0        | 0.77         | 1426                                         | 1.31                            | 0.1687                                  | 1.19  | 10.26                                  | 1.70   | 0.4658                                 | 0.7741 | 0.46 | 0.6              |                    | 2459                                   | 16   | 2465                                   | 16   | 2453                                    | 25 |
| 53                                                                          | r                   | B                    | 2A                 | 23.3       | 11.9        | 14.0        | 0.51         | 4375                                         | 0.43                            | 0.1631                                  | 1.20  | 10.16                                  | 1.50   | 0.4599                                 | 0.7482 | 0.50 | -0.9             |                    | 2449                                   | 14   | 2439                                   | 15   | 2457                                    | 22 |
| 26a                                                                         | r                   | B                    | 5A (partial)       | 11.7       | 8.9         | 7.5         | 0.76         | 1254                                         | 1.49                            | 0.1704                                  | 1.63  | 10.47                                  | 2.45   | 0.4737                                 | 1.0938 | 0.45 | 2.0              |                    | 2477                                   | 23   | 2500                                   | 23   | 2459                                    | 37 |
| 21b                                                                         | r                   | B                    | 6A                 | 16.5       | 9.4         | 10.1        | 0.57         | 3947                                         | 0.47                            | 0.1644                                  | 1.60  | 10.45                                  | 1.99   | 0.4702                                 | 0.9419 | 0.47 | 0.8              |                    | 2476                                   | 19   | 2484                                   | 19   | 2468                                    | 29 |
| 51b                                                                         | r                   | B                    | 2A                 | 18.6       | 8.3         | 10.9        | 0.45         | 2930                                         | 0.64                            | 0.1657                                  | 1.34  | 10.26                                  | 1.77   | 0.4612                                 | 0.9247 | 0.52 | -1.2             |                    | 2459                                   | 16   | 2445                                   | 19   | 2470                                    | 25 |
| 27a                                                                         | sp                  | B                    | 4C                 | 29.8       | 14.2        | 17.7        | 0.48         | 7382                                         | 0.25                            | 0.1637                                  | 1.10  | 10.25                                  | 1.56   | 0.4588                                 | 1.0375 | 0.66 | -2.0             |                    | 2457                                   | 15   | 2434                                   | 21   | 2476                                    | 20 |
| 36a                                                                         | cs                  | M                    | 2A                 | 26.3       | 23.1        | 17.3        | 0.88         | 12066                                        | 0.16                            | 0.1631                                  | 1.11  | 10.44                                  | 1.51   | 0.4674                                 | 0.9911 | 0.65 | -0.2             |                    | 2475                                   | 14   | 2472                                   | 20   | 2477                                    | 19 |
| 28a                                                                         | cs                  | M                    | 4B                 | 18.9       | 7.4         | 11.2        | 0.39         | 24695                                        | (0.08)                          | 0.1622                                  | 1.38  | 10.39                                  | 1.68   | 0.4646                                 | 0.9508 | 0.57 | -0.9             |                    | 2470                                   | 16   | 2460                                   | 19   | 2479                                    | 23 |
| 11a                                                                         | r                   | B                    | 9B                 | 29.6       | 29.0        | 19.8        | 0.98         | 4039                                         | 0.46                            | 0.1658                                  | 1.14  | 10.48                                  | 1.62   | 0.4674                                 | 1.0277 | 0.64 | -0.6             |                    | 2479                                   | 15   | 2472                                   | 21   | 2484                                    | 21 |
| 13b                                                                         | c2                  | M                    | 7A                 | 47.7       | 37.7        | 32.3        | 0.79         | 3710                                         | 0.50                            | 0.1664                                  | 0.83  | 11.06                                  | 1.33   | 0.4923                                 | 0.9671 | 0.73 | 4.6              | 0.2                | 2528                                   | 12   | 2581                                   | 21   | 2487                                    | 15 |
| 37b                                                                         | r                   | B                    | 2B                 | 16.4       | 15.4        | 10.8        | 0.78         | 1354                                         | 1.38                            | 0.1723                                  | 1.85  | 10.53                                  | 2.39   | 0.4685                                 | 0.9809 | 0.41 | -0.5             |                    | 2483                                   | 22   | 2477                                   | 20   | 2487                                    | 36 |
| 15a                                                                         | r                   | B                    | 7A                 | 11.3       | 6.4         | 7.1         | 0.57         | 10159                                        | (0.18)                          | 0.1633                                  | 1.68  | 10.77                                  | 1.97   | 0.4785                                 | 1.0243 | 0.52 | 1.5              |                    | 2504                                   | 18   | 2521                                   | 21   | 2490                                    | 28 |
| 29a                                                                         | r                   | B                    | 4B                 | 21.3       | 10.7        | 13.3        | 0.50         | 6871                                         | 0.27                            | 0.1653                                  | 1.19  | 10.86                                  | 1.60   | 0.4816                                 | 0.9863 | 0.62 | 2.0              |                    | 2511                                   | 15   | 2534                                   | 21   | 2492                                    | 21 |
| 76b                                                                         | r                   | B                    | 3B (partial)       | 26.7       | 23.8        | 16.6        | 0.89         | 2281                                         | 0.82                            | 0.1691                                  | 1.39  | 10.03                                  | 1.75   | 0.4448                                 | 0.6856 | 0.39 | -5.8             |                    | 2438                                   | 16   | 2372                                   | 14   | 2493                                    | 27 |
| 49b                                                                         | r                   | B                    | 2B                 | 25.3       | 19.2        | 16.0        | 0.76         | 5666                                         | 0.33                            | 0.1659                                  | 1.15  | 10.47                                  | 1.45   | 0.4639                                 | 0.7510 | 0.52 | 1.1              |                    | 2477                                   | 13   | 2457                                   | 15   | 2494                                    | 21 |
| 1b (HF)                                                                     | r                   | B                    | 8A                 | 19.9       | 15.4        | 13.3        | 0.78         | 18759                                        | (0.10)                          | 0.1643                                  | 1.39  | 10.95                                  | 1.73   | 0.4832                                 | 1.0301 | 0.59 | 2.0              |                    | 2519                                   | 16   | 2541                                   | 22   | 2501                                    | 23 |
| 39a                                                                         | sp                  | B                    | 1B                 | 27.4       | 11.8        | 16.0        | 0.43         | 4731                                         | 0.40                            | 0.1671                                  | 1.10  | 10.33                                  | 1.53   | 0.4559                                 | 0.9751 | 0.64 | -3.8             |                    | 2465                                   | 14   | 2421                                   | 20   | 2501                                    | 20 |
| 46a                                                                         | cs                  | M                    | 1B                 | 26.5       | 11.9        | 15.7        | 0.45         | 2717                                         | 0.69                            | 0.1692                                  | 1.43  | 10.55                                  | 1.75   | 0.4650                                 | 0.8009 | 0.46 | -2.0             |                    | 2484                                   | 16   | 2462                                   | 16   | 2503                                    | 26 |
| 52                                                                          | sp                  | B                    | 2A                 | 26.8       | 11.1        | 16.5        | 0.41         | 4769                                         | 0.39                            | 0.1675                                  | 1.53  | 10.94                                  | 1.77   | 0.4812                                 | 0.7410 | 0.42 | 1.3              |                    | 2518                                   | 17   | 2533                                   | 16   | 2506                                    | 27 |
| 13a                                                                         | c1                  | D                    | 7A                 | 77.9       | 47.2        | 48.9        | 0.61         | 42026                                        | (0.04)                          | 0.1649                                  | 0.64  | 10.75                                  | 1.16   | 0.4729                                 | 0.9689 | 0.83 | -0.5             |                    | 2502                                   | 11   | 2496                                   | 20   | 2507                                    | 11 |
| 57b                                                                         | r                   | B                    | 4B                 | 10.7       | 11.3        | 7.3         | 1.05         | 1721                                         | 1.09                            | 0.1723                                  | 2.54  | 10.78                                  | 2.99   | 0.4740                                 | 0.7448 | 0.25 | -0.3             |                    | 2505                                   | 28   | 2501                                   | 15   | 2507                                    | 48 |
| 12c                                                                         | r                   | B                    | 7A                 | 29.6       | 22.4        | 19.0        | 0.76         | 5339                                         | 0.35                            | 0.1674                                  | 1.04  | 10.70                                  | 1.45   | 0.4705                                 | 0.9416 | 0.65 | -1.0             |                    | 2498                                   | 14   | 2486                                   | 19   | 2508                                    | 18 |
| 77b                                                                         | r                   | B                    | 4A                 | 14.7       | 9.0         | 9.0         | 0.61         | 2911                                         | 0.64                            | 0.1694                                  | 1.06  | 10.50                                  | 1.36   | 0.4612                                 | 0.6524 | 0.48 | -3.0             |                    | 2480                                   | 13   | 2445                                   | 13   | 2509                                    | 20 |
| 2                                                                           | r                   | M                    | 9A                 | 29.1       | 12.5        | 17.6        | 0.43         | 35372                                        | (0.05)                          | 0.1653                                  | 1.32  | 10.73                                  | 1.65   | 0.4709                                 | 0.9827 | 0.60 | -1.1             |                    | 2500                                   | 15   | 2487                                   | 20   | 2511                                    | 22 |
| 3                                                                           | sp                  | B                    | 9A                 | 21.9       | 9.9         | 13.4        | 0.45         | 5517                                         | 0.34                            | 0.1678                                  | 1.15  | 10.87                                  | 1.58   | 0.4760                                 | 0.9867 | 0.62 | -0.2             |                    | 2512                                   | 15   | 2510                                   | 21   | 2513                                    | 21 |
| 75b                                                                         | r                   | B                    | 3A                 | 25.7       | 13.9        | 15.6        | 0.54         | 27006                                        | (0.07)                          | 0.1656                                  | 0.93  | 10.59                                  | 1.19   | 0.4637                                 | 0.7434 | 0.62 | -2.8             |                    | 2488                                   | 11   | 2456                                   | 15   | 2514                                    | 16 |
| 20b                                                                         | r                   | B                    | 6A                 | 17.3       | 18.5        | 11.6        | 1.07         | 13460                                        | (0.14)                          | 0.1657                                  | 1.37  | 10.50                                  | 1.67   | 0.4599                                 | 0.9430 | 0.57 | -3.6             |                    | 2480                                   | 16   | 2439                                   | 19   | 2514                                    | 23 |
| 67b                                                                         | r                   | B                    | 6B                 | 17.1       | 7.6         | 10.6        | 0.44         | 2161                                         | 0.87                            | 0.1716                                  | 1.76  | 11.09                                  | 2.10   | 0.4852                                 | 0.7838 | 0.37 | 1.6              |                    | 2531                                   | 20   | 2550                                   | 17   | 2516                                    | 32 |
| 48                                                                          | sp                  | B                    | 2C                 | 19.3       | 8.9         | 11.5        | 0.46         | 1046                                         | 1.79                            | 0.1778                                  | 1.52  | 10.57                                  | 2.13   | 0.4621                                 | 0.7420 | 0.35 | -3.2             |                    | 2486                                   | 20   | 2449                                   | 15   | 2516                                    | 33 |
| 25a (HF-8)                                                                  | sp                  | B                    | 5A (partial)       | 29.7       | 10.8        | 17.7        | 0.36         | 2273                                         | 0.82                            | 0.1717                                  | 1.15  | 10.81                                  | 1.63   | 0.4716                                 | 0.9648 | 0.59 | -1.4             |                    | 2507                                   | 15   | 2491                                   | 20   | 2520                                    | 22 |
| 6b                                                                          | r                   | B                    | 6B                 | 15.2       | 11.6        | 9.8         | 0.76         | 2328                                         | 0.80                            | 0.1725                                  | 1.41  | 10.81                                  | 1.90   | 0.4691                                 | 0.9713 | 0.51 | -2.4             |                    | 2507                                   | 18   | 2480                                   | 20   | 2529                                    | 27 |
| 5 (HF-3)                                                                    | r                   | B                    | 9A (partial)       | 21.7       | 9.8         | 13.5        | 0.45         | 20866                                        | (0.09)                          | 0.1672                                  | 1.18  | 11.09                                  | 1.56   | 0.4808                                 | 1.0245 | 0.66 | 0.0              |                    | 2530                                   | 15   | 2531                                   | 21   | 2530                                    | 20 |
| 4a                                                                          | cs                  | D                    | 9B                 | 22.9       | 11.0        | 14.8        | 0.48         | 10444                                        | 0.18                            | 0.1695                                  | 1.41  | 11.52                                  | 1.74   | 0.4966                                 | 0.9813 | 0.56 | 2.8              |                    | 2567                                   | 16   | 2599                                   | 21   | 2541                                    | 24 |
| 19a (HF-7)                                                                  | sp                  | M                    | 6A                 | 32.5       | 25.1        | 22.2        | 0.77         | (0.00)                                       | 0.1686                          | 0.97                                    | 11.40 | 1.38                                   | 0.4905 | 0.9762                                 | 0.71   | 1.4  |                  | 2557               | 13                                     | 2573 | 21                                     | 2544 | 16                                      |    |
| 40c                                                                         | cs                  | D                    | 1C                 | 64.8       | 37.8        | 39.6        | 0.58         | 53321                                        | (0.04)                          | 0.1687                                  | 0.70  | 10.73                                  | 1.21   | 0.4612                                 | 0.9908 | 0.82 | -4.7             | -1.3               | 2500                                   | 11   | 2445                                   | 20   | 2545                                    | 12 |
| 71b                                                                         | r                   | B                    | 1D                 | 13.8       | 6.8         | 8.8         | 0.49         | 6702                                         | 0.28                            | 0.1706                                  | 1.39  | 11.37                                  | 1.61   | 0.4886                                 | 0.7341 | 0.46 | 0.9              |                    | 2554                                   | 15   | 2564                                   | 16   | 2545                                    | 24 |
| 73a                                                                         | sp                  | M                    | 2C                 | 14.2       | 8.5         | 9.1         | 0.60         | 22971                                        | (0.08)                          | 0.1694                                  | 1.11  | 11.20                                  | 1.39   | 0.4795                                 | 0.8324 | 0.60 | -1.3             |                    | 2540                                   | 13   | 2525                                   | 17   | 2552                                    | 19 |
| 58a                                                                         | r                   | B                    | 4B                 | 21.8       | 31.5        | 16.7        | 1.44         | 11042                                        | (0.17)                          | 0.1702                                  | 1.32  | 11.49                                  | 1.53   | 0.4897                                 | 0.7878 | 0.51 | 0.5              |                    | 2564                                   | 14   | 2569                                   | 17   | 2559                                    | 22 |
| 34a                                                                         | cs                  | M                    | 3B (partial)       | 32.7       | 30.1        | 23.0        | 0.92         | 11710                                        | 0.16                            | 0.1715                                  | 1.12  | 11.62                                  | 1.50   | 0.4948                                 | 0.9727 | 0.65 | 1.4              |                    | 2575                                   | 14   | 2591                                   | 21   | 2562                                    | 19 |
| 44                                                                          | cs                  | M                    | 1A                 | 15.4       | 15.7        | 11.1        | 1.02         | 683                                          | 2.74                            | 0.1892                                  | 2.76  | 11.96                                  | 3.90   | 0.5076                                 | 1.0364 | 0.27 | 3.8              |                    | 2602                                   | 37   | 2646                                   | 23   | 2567                                    | 62 |
| 68                                                                          | cs                  | D                    | 7A                 | 61.9       | 52.2        | 42.9        | 0.84         | 10335                                        | 0.18                            | 0.1724                                  | 0.68  | 11.63                                  | 1.04   | 0.4927                                 | 0.7615 | 0.74 | 0.6              |                    | 2575                                   | 10   | 2583                                   | 16   | 2569                                    | 12 |
| 45c                                                                         | r                   | B                    | 1A                 | 18.6       | 17.5        | 13.5        | 0.94         | 2156                                         | 0.87                            | 0.1771                                  | 1.55  | 12.11                                  | 1.84   | 0.5126                                 | 0.7512 | 0.41 | 4.6              |                    | 2613                                   | 17   | 2668                                   | 16   | 2571                                    | 28 |
| 67a                                                                         | cs                  | D                    | 6B                 | 323.6      | 268.4       | 218.3       | 0.83         | 17575                                        | 0.11                            | 0.1728                                  | 0.47  | 11.59                                  | 0.91   | 0.4884                                 | 0.7688 | 0.85 | -0.7             |                    | 2572                                   | 9    | 2564                                   | 16   | 2578                                    | 8  |
| 60a                                                                         | cs                  | D                    | 4A                 | 449.1      | 285.8       | 287.8       | 0.64         | 31686                                        | 0.06                            | 0.1730                                  | 0.62  | 11.39                                  | 0.97   | 0.4783                                 | 0.7423 | 0.77 | -3.0             | -0.1               | 2555                                   | 9    | 2520                                   | 16   | 2584                                    | 10 |
| 70b                                                                         | r                   | B                    | 2C                 | 22.9       | 19.5        | 15.9        | 0.85         | 14034                                        | (0.13)                          | 0.1745                                  | 1.26  | 12.02                                  | 1.49   | 0.4996                                 | 0.7927 | 0.53 | 0.5              |                    | 2606                                   | 14   | 2612                                   | 17   | 2601                                    | 21 |
| 33a                                                                         | cs                  | D                    | 3A                 | 91.4       | 50.4        | 59.5        | 0.55         | 6012                                         | 0.31                            | 0.1789                                  | 0.56  | 12.03                                  | 1.11   | 0.4933                                 | 0.9440 | 0.85 | -1.8             |                    | 2607                                   | 11   | 2585                                   | 20   | 2624                                    | 10 |
| 55b                                                                         | r                   | B                    | 3A                 | 15.1       | 14.7        | 9.0         | 0.97         | 542                                          | 3.45                            | 0.1988                                  | 3.00  | 10.58                                  | 4.79   | 0.4335                                 | 2.9512 | 0.62 | -13.8            |                    | 2487                                   | 45   | 2321                                   | 58   | 2625                                    | 61 |
| 46b                                                                         | r                   | B                    | 1B                 |            |             |             |              |                                              |                                 |                                         |       |                                        |        |                                        |        |      |                  |                    |                                        |      |                                        |      |                                         |    |

Table S1. SIMS U-Th-Pb data from Lewisian granulites

| Grain/<br>spot # <sup>1</sup>                                                                | Growth <sup>2</sup> | CL char <sup>3</sup> | Image <sup>4</sup> | [U]<br>ppm | [Th]<br>ppm | [Pb]<br>ppm | Th/U<br>meas | <sup>206</sup> Pb/ <sup>204</sup> Pb<br>meas | f <sub>206%5</sub> | <sup>207</sup> Pb/<br><sup>206</sup> Pb | ±σ   | <sup>207</sup> Pb/<br><sup>235</sup> U | ±σ   | <sup>206</sup> Pb/<br><sup>238</sup> U | ±σ     | ρ    | Disc. %<br>conv. | Disc. %<br>2σ lim. | <sup>207</sup> Pb/<br><sup>235</sup> U | ±σ | <sup>206</sup> Pb/<br><sup>238</sup> U | ±σ | <sup>207</sup> Pb/<br><sup>206</sup> Pb | ±σ |  |  |
|----------------------------------------------------------------------------------------------|---------------------|----------------------|--------------------|------------|-------------|-------------|--------------|----------------------------------------------|--------------------|-----------------------------------------|------|----------------------------------------|------|----------------------------------------|--------|------|------------------|--------------------|----------------------------------------|----|----------------------------------------|----|-----------------------------------------|----|--|--|
| 15b                                                                                          | c2                  | M                    | 7A                 | 37.4       | 93.4        | 36.2        | 2.49         | 3413                                         | 0.55               | 0.1872                                  | 0.93 | 13.24                                  | 1.39 | 0.5228                                 | 0.9730 | 0.70 | 1.1              |                    | 2697                                   | 13 | 2711                                   | 22 | 2686                                    | 16 |  |  |
| 45                                                                                           | c1                  | D                    | 1A                 | 136.5      | 149.5       | 99.6        | 1.09         | 7498                                         | 0.25               | 0.1856                                  | 0.98 | 12.31                                  | 1.37 | 0.4851                                 | 0.9364 | 0.68 | -6.3             | -1.9               | 2628                                   | 13 | 2550                                   | 20 | 2689                                    | 17 |  |  |
| 9a                                                                                           | 9a                  | D                    | 9A                 | 269.5      | 208.2       | 190.8       | 0.77         | 138188                                       | 0.01               | 0.1860                                  | 0.59 | 13.02                                  | 1.15 | 0.5080                                 | 0.9823 | 0.86 | -2.6             |                    | 2681                                   | 11 | 2648                                   | 21 | 2706                                    | 10 |  |  |
| 18b                                                                                          | cs                  | M                    | 6A                 | 39.8       | 38.1        | 30.0        | 0.96         | 26515                                        | (0.07)             | 0.1874                                  | 0.96 | 13.48                                  | 1.38 | 0.5218                                 | 0.9975 | 0.72 | -0.6             |                    | 2714                                   | 13 | 2707                                   | 22 | 2719                                    | 16 |  |  |
| 4b                                                                                           | r                   | B                    | 9B                 | 199.0      | 175.3       | 151.4       | 0.88         | 33334                                        | 0.06               | 0.1879                                  | 0.41 | 13.79                                  | 1.03 | 0.5334                                 | 0.9415 | 0.91 | 1.6              |                    | 2736                                   | 10 | 2756                                   | 21 | 2721                                    | 7  |  |  |
| 37a                                                                                          | cs                  | D                    | 2B                 | 59.6       | 68.2        | 46.4        | 1.15         | 16526                                        | 0.11               | 0.1896                                  | 0.67 | 13.45                                  | 1.18 | 0.5165                                 | 0.9600 | 0.82 | -2.1             |                    | 2712                                   | 11 | 2685                                   | 21 | 2732                                    | 11 |  |  |
| 17a                                                                                          | cs                  | D                    | 6A                 | 88.5       | 22.9        | 59.4        | 0.26         | 8363                                         | 0.22               | 0.1910                                  | 0.60 | 13.92                                  | 1.18 | 0.5325                                 | 1.0081 | 0.85 | 0.6              |                    | 2744                                   | 11 | 2752                                   | 23 | 2738                                    | 10 |  |  |
| 38a                                                                                          | cs                  | M                    | 2C                 | 48.4       | 66.6        | 40.1        | 1.38         | 60574                                        | (0.03)             | 0.1915                                  | 1.18 | 13.96                                  | 1.52 | 0.5285                                 | 0.9569 | 0.63 | -0.9             |                    | 2747                                   | 14 | 2735                                   | 21 | 2755                                    | 19 |  |  |
| 45b                                                                                          | c2                  | M                    | 1A                 | 66.2       | 10.5        | 40.9        | 0.16         | 36660                                        | 0.05               | 0.1919                                  | 1.08 | 13.18                                  | 1.54 | 0.4990                                 | 1.0871 | 0.71 | -6.5             | -1.8               | 2693                                   | 15 | 2610                                   | 23 | 2756                                    | 18 |  |  |
| 56                                                                                           | cs                  | M                    | 4B                 | 22.5       | 15.0        | 16.9        | 0.67         | 12760                                        | (0.15)             | 0.1929                                  | 1.34 | 14.50                                  | 1.54 | 0.5452                                 | 0.7753 | 0.50 | 1.7              |                    | 2783                                   | 15 | 2805                                   | 18 | 2767                                    | 22 |  |  |
| 10a (HF-4)                                                                                   | r                   | B                    | 9A                 | 25.5       | 32.7        | 21.0        | 1.28         | 10252                                        | 0.18               | 0.1946                                  | 1.65 | 14.20                                  | 1.95 | 0.5323                                 | 1.0004 | 0.51 | -0.9             |                    | 2763                                   | 19 | 2751                                   | 22 | 2772                                    | 27 |  |  |
| 70a                                                                                          | cs                  | D                    | 2C                 | 154.3      | 61.2        | 107.4       | 0.40         | 20576                                        | 0.09               | 0.1947                                  | 0.76 | 14.36                                  | 1.01 | 0.5363                                 | 0.6664 | 0.66 | -0.4             |                    | 2774                                   | 10 | 2768                                   | 15 | 2778                                    | 12 |  |  |
| 30a                                                                                          | cs                  | D                    | 4A                 | 149.8      | 123.9       | 114.4       | 0.83         | 6506                                         | 0.29               | 0.1974                                  | 0.63 | 14.53                                  | 1.15 | 0.5390                                 | 0.9489 | 0.83 | -0.5             |                    | 2785                                   | 11 | 2779                                   | 21 | 2790                                    | 10 |  |  |
| 49a                                                                                          | cs                  | D                    | 2B                 | 116.6      | 77.1        | 85.9        | 0.66         | 13611                                        | 0.14               | 0.1967                                  | 0.75 | 14.42                                  | 1.07 | 0.5339                                 | 0.7611 | 0.71 | -1.5             |                    | 2778                                   | 10 | 2758                                   | 17 | 2792                                    | 12 |  |  |
| 22a                                                                                          | cs                  | D                    | 6B                 | 170.6      | 111.6       | 124.3       | 0.65         | 24914                                        | 0.08               | 0.1965                                  | 0.48 | 14.37                                  | 1.06 | 0.5315                                 | 0.9475 | 0.89 | -2.0             |                    | 2774                                   | 10 | 2748                                   | 21 | 2794                                    | 8  |  |  |
| 20a                                                                                          | cs                  | M                    | 6A                 | 74.2       | 46.6        | 53.6        | 0.63         | 21181                                        | 0.09               | 0.1967                                  | 0.58 | 14.32                                  | 1.11 | 0.5296                                 | 0.9424 | 0.85 | -2.4             |                    | 2771                                   | 11 | 2740                                   | 21 | 2794                                    | 10 |  |  |
| 63                                                                                           | cs                  | M                    | 6C                 | 104.9      | 27.0        | 61.7        | 0.26         | 17624                                        | 0.11               | 0.1969                                  | 1.58 | 12.40                                  | 2.50 | 0.4585                                 | 1.9267 | 0.77 | -15.5            | -8.6               | 2635                                   | 24 | 2433                                   | 39 | 2795                                    | 26 |  |  |
| 57a                                                                                          | cs                  | D                    | 4B                 | 50.6       | 35.1        | 38.1        | 0.69         | 10113                                        | 0.18               | 0.1976                                  | 1.27 | 14.73                                  | 1.49 | 0.5438                                 | 0.7444 | 0.50 | 0.1              |                    | 2798                                   | 14 | 2799                                   | 17 | 2797                                    | 21 |  |  |
| 50                                                                                           | sp                  | B                    | 2B                 | 22.7       | 8.5         | 15.7        | 0.38         | 4864                                         | 0.38               | 0.1990                                  | 2.08 | 14.48                                  | 2.26 | 0.5345                                 | 0.7500 | 0.33 | -1.6             |                    | 2782                                   | 22 | 2760                                   | 17 | 2797                                    | 34 |  |  |
| 16a (HF-6)                                                                                   | cs                  | M                    | 7B                 | 51.1       | 44.1        | 39.6        | 0.86         | 23333                                        | 0.08               | 0.1975                                  | 0.69 | 14.76                                  | 1.19 | 0.5435                                 | 0.9653 | 0.81 | -0.1             |                    | 2800                                   | 11 | 2798                                   | 22 | 2801                                    | 11 |  |  |
| 23a                                                                                          | cs                  | M                    | 6C                 | 37.3       | 29.3        | 28.5        | 0.78         | 21097                                        | 0.09               | 0.1982                                  | 1.29 | 14.80                                  | 1.61 | 0.5433                                 | 0.9522 | 0.59 | -0.4             |                    | 2803                                   | 15 | 2797                                   | 22 | 2806                                    | 21 |  |  |
| 76a                                                                                          | cs                  | D                    | 3A (partial)       | 58.4       | 99.7        | 52.8        | 1.71         | 51730                                        | (0.04)             | 0.1984                                  | 0.75 | 15.01                                  | 1.09 | 0.5487                                 | 0.7928 | 0.73 | 0.3              |                    | 2816                                   | 10 | 2820                                   | 18 | 2813                                    | 12 |  |  |
| 75a                                                                                          | cs                  | D                    | 3A                 | 51.9       | 82.4        | 46.7        | 1.59         | 31009                                        | 0.06               | 0.1991                                  | 0.89 | 15.36                                  | 1.14 | 0.5604                                 | 0.7090 | 0.62 | 2.3              |                    | 2838                                   | 11 | 2868                                   | 16 | 2816                                    | 15 |  |  |
| 32a (HF-10)                                                                                  | cs                  | M                    | 2B                 | 41.1       | 34.1        | 32.0        | 0.83         | 62434                                        | (0.03)             | 0.1989                                  | 2.18 | 15.00                                  | 2.39 | 0.5469                                 | 0.9852 | 0.41 | -0.2             |                    | 2815                                   | 23 | 2812                                   | 22 | 2817                                    | 35 |  |  |
| 6b (HF-2)                                                                                    | cs                  | D                    | 9B                 | 101.1      | 29.0        | 71.4        | 0.29         | 37238                                        | 0.05               | 0.1995                                  | 0.84 | 15.21                                  | 1.20 | 0.5538                                 | 0.8537 | 0.71 | 1.0              |                    | 2828                                   | 11 | 2841                                   | 20 | 2819                                    | 14 |  |  |
| 12a                                                                                          | c1                  | D                    | 7A                 | 255.5      | 207.5       | 199.3       | 0.81         | 25280                                        | 0.07               | 0.1997                                  | 0.36 | 15.07                                  | 1.03 | 0.5487                                 | 0.9585 | 0.94 | 0.0              |                    | 2820                                   | 10 | 2820                                   | 20 | 2820                                    | 6  |  |  |
| 61a                                                                                          | cs                  | D                    | 5A                 | 383.8      | 311.1       | 273.8       | 0.81         | 16123                                        | 0.12               | 0.2008                                  | 0.27 | 14.00                                  | 0.81 | 0.5076                                 | 0.7628 | 0.94 | -7.8             | -6.0               | 2750                                   | 8  | 2646                                   | 17 | 2827                                    | 5  |  |  |
| 1a (HF)                                                                                      | cs                  | D                    | 8A                 | 66.3       | 45.8        | 51.5        | 0.69         | 21281                                        | 0.09               | 0.2009                                  | 0.78 | 15.60                                  | 1.25 | 0.5648                                 | 0.9709 | 0.78 | 2.5              |                    | 2853                                   | 12 | 2887                                   | 23 | 2829                                    | 13 |  |  |
| 72a (HF)                                                                                     | cs                  | D                    | 1D                 | 384.6      | 287.7       | 299.2       | 0.75         | 38760                                        | 0.05               | 0.2007                                  | 0.79 | 15.44                                  | 1.06 | 0.5589                                 | 0.7079 | 0.67 | 1.4              |                    | 2843                                   | 10 | 2862                                   | 16 | 2830                                    | 13 |  |  |
| 66                                                                                           | sp/c                | M                    | 6B                 | 20.9       | 8.9         | 14.5        | 0.43         | 7171                                         | 0.26               | 0.2023                                  | 3.71 | 14.47                                  | 3.83 | 0.5231                                 | 0.7472 | 0.20 | -5.2             |                    | 2781                                   | 37 | 2712                                   | 17 | 2832                                    | 60 |  |  |
| 15c                                                                                          | c1                  | D                    | 7A                 | 274.9      | 371.2       | 240.7       | 1.35         | 51845                                        | 0.04               | 0.2017                                  | 0.39 | 15.62                                  | 1.02 | 0.5622                                 | 0.9409 | 0.92 | 1.7              |                    | 2854                                   | 10 | 2876                                   | 22 | 2838                                    | 6  |  |  |
| 47                                                                                           | cs                  | D                    | 2C                 | 232.1      | 89.2        | 160.7       | 0.38         | 12188                                        | 0.15               | 0.2033                                  | 1.18 | 14.71                                  | 1.42 | 0.5273                                 | 0.7755 | 0.55 | -4.9             | -0.1               | 2797                                   | 14 | 2730                                   | 17 | 2845                                    | 19 |  |  |
| 35b (HF-11)                                                                                  | cs                  | D                    | 2A                 | 63.4       | 34.4        | 48.1        | 0.54         | 21894                                        | 0.09               | 0.2029                                  | 0.64 | 15.69                                  | 0.93 | 0.5624                                 | 0.6613 | 0.71 | 1.3              |                    | 2858                                   | 9  | 2877                                   | 15 | 2846                                    | 11 |  |  |
| 26b (HF-9)                                                                                   | cs                  | D                    | 5A (partial)       | 344.1      | 96.4        | 252.2       | 0.28         | 43127                                        | 0.04               | 0.2029                                  | 0.83 | 16.14                                  | 1.54 | 0.5776                                 | 1.2984 | 0.84 | 4.0              |                    | 2885                                   | 15 | 2939                                   | 31 | 2847                                    | 13 |  |  |
| 40a                                                                                          | cs                  | D                    | 1C                 | 182.7      | 106.1       | 137.7       | 0.58         | 163480                                       | (0.01)             | 0.2031                                  | 0.77 | 15.50                                  | 1.23 | 0.5535                                 | 0.9508 | 0.78 | -0.5             |                    | 2846                                   | 12 | 2840                                   | 22 | 2851                                    | 13 |  |  |
| 58b                                                                                          | cs                  | D                    | 4B                 | 169.6      | 83.3        | 128.2       | 0.49         | 33564                                        | 0.06               | 0.2035                                  | 0.95 | 15.89                                  | 1.22 | 0.5674                                 | 0.7681 | 0.63 | 2.0              |                    | 2870                                   | 12 | 2897                                   | 18 | 2852                                    | 15 |  |  |
| 11b (HF)                                                                                     | cs                  | D                    | 11b                | 305.0      | 234.0       | 244.4       | 0.77         | 4833                                         | 0.39               | 0.2060                                  | 0.47 | 15.97                                  | 1.06 | 0.5692                                 | 0.9436 | 0.89 | 2.2              |                    | 2875                                   | 10 | 2905                                   | 22 | 2855                                    | 8  |  |  |
| 41a (HF)                                                                                     | cs                  | D                    | 1A                 | 362.2      | 270.9       | 284.2       | 0.75         | 40905                                        | 0.05               | 0.2040                                  | 0.86 | 15.69                                  | 1.14 | 0.5584                                 | 0.7488 | 0.66 | 0.2              |                    | 2858                                   | 11 | 2868                                   | 17 | 2856                                    | 14 |  |  |
| 77a                                                                                          | cs                  | D                    | 4A                 | 64.0       | 102.4       | 59.6        | 1.60         | 17542                                        | 0.11               | 0.2050                                  | 0.86 | 16.26                                  | 1.51 | 0.5772                                 | 1.2347 | 0.82 | 3.3              |                    | 2892                                   | 15 | 2937                                   | 29 | 2861                                    | 14 |  |  |
| 7a (HF)                                                                                      | cs                  | D                    | 9B                 | 175.2      | 123.1       | 136.1       | 0.70         | 50515                                        | 0.04               | 0.2050                                  | 0.74 | 15.70                                  | 1.20 | 0.5560                                 | 0.9511 | 0.79 | -0.6             |                    | 2859                                   | 12 | 2850                                   | 22 | 2865                                    | 12 |  |  |
| 71a (HF)                                                                                     | cs                  | D                    | 1D                 | 387.7      | 251.1       | 302.3       | 0.65         | 64459                                        | 0.03               | 0.2052                                  | 0.74 | 16.04                                  | 1.03 | 0.5674                                 | 0.7101 | 0.69 | 1.3              |                    | 2879                                   | 10 | 2897                                   | 17 | 2867                                    | 12 |  |  |
| 24a (HF)                                                                                     | cs                  | D                    | 6B                 | 55.3       | 33.2        | 42.7        | 0.60         | 9444                                         | 0.20               | 0.2082                                  | 0.83 | 16.06                                  | 1.28 | 0.5628                                 | 0.9633 | 0.75 | -0.2             |                    | 2880                                   | 12 | 2878                                   | 22 | 2882                                    | 14 |  |  |
| 65b (HF)                                                                                     | cs                  | D                    | 6B                 | 97.9       | 110.6       | 85.1        | 1.13         | 4782                                         | 0.39               | 0.2100                                  | 0.64 | 16.37                                  | 1.11 | 0.5720                                 | 0.8617 | 0.78 | 1.3              |                    | 2899                                   | 11 | 2916                                   | 20 | 2887                                    | 11 |  |  |
| 21a (HF)                                                                                     | cs                  | M                    | 6A                 | 28.8       | 20.7        | 23.9        | 0.72         | 10032                                        | 0.19               | 0.2092                                  | 1.10 | 16.99                                  | 1.47 | 0.5921                                 | 0.9496 | 0.65 | 4.7              |                    | 2934                                   | 14 | 2998                                   | 23 | 2890                                    | 18 |  |  |
| <i>Lew99-GE (n2821<sup>6</sup>) - granulite facies tonalite, Geodh Eanruig (Scouriemore)</i> |                     |                      |                    |            |             |             |              |                                              |                    |                                         |      |                                        |      |                                        |        |      |                  |                    |                                        |    |                                        |    |                                         |    |  |  |
| 41b                                                                                          | r/c2                | M                    | 2A                 | 10.8       | 9.2         | 6.7         | 0.86         | 1039                                         | 1.80               | 0.1625                                  | 1.79 | 9.66                                   | 2.67 | 0.4664                                 | 1.0538 | 0.39 | 6.1              |                    | 2402                                   | 25 | 2468                                   | 22 | 2348                                    | 41 |  |  |
| 46                                                                                           | r                   | B                    | 5A                 | 20.9       | 19.0        | 13.6        | 0.91         | 1360                                         | 1.37               | 0.1631                                  | 1.25 | 9.94                                   | 1.91 | 0.4688                                 | 0.8132 | 0.43 | 4.6              |                    | 2429                                   | 18 | 2478                                   | 17 | 2388                                    | 29 |  |  |
| 44a                                                                                          | r                   | B                    | 5A                 | 51.1       | 51.2        | 33.2        | 1.00         | 1737                                         | 1.08               | 0.1618                                  | 0.85 | 9.80                                   | 1.36 | 0.4601                                 | 0.8580 | 0.63 | 2.2              |                    | 2416                                   | 13 | 2440                                   | 17 | 2396                                    | 18 |  |  |
| 59                                                                                           | sp                  | B                    | 8B                 | 23.6       | 21.5        | 15.5        | 0.91         | 2838                                         | 0.66               | 0.1605                                  | 1.54 | 10.12                                  | 1.99 | 0.4702                                 | 0.9410 | 0.47 | 3.5              |                    | 2446                                   | 19 | 2484                                   | 19 | 2413                                    | 30 |  |  |
| 42                                                                                           | r                   | M                    | 2A                 | 30.0       | 27.4        | 19.3        | 0.91         | 1928                                         | 0.97               | 0.1637                                  | 1.08 | 10.06                                  | 1.56 | 0.4641                                 | 0.8132 | 0.52 | 1.6              |                    | 2440                                   | 14 | 2458                                   | 17 | 2425                                    | 22 |  |  |
| 37a                                                                                          | c                   | B                    | 1A                 | 17.1       | 1.7         | 9.9         | 0.10         | 1739                                         | 1.08               | 0.1653                                  | 1.49 | 10.88                                  | 1.98 | 0.4993                                 | 0.8155 | 0.41 | 8.8              | 0.9                | 2513                                   | 19 | 2611                                   | 18 | 2435                                    | 30 |  |  |
| 52x                                                                                          | cz                  | M                    | 6C                 | 26.5       | 27.7        | 17.7        | 1.05         | 2007                                         | 0.93               | 0.1644                                  | 1.19 | 10.22                                  | 1.57 | 0.4687                                 | 0.7414 | 0.47 | 2.1              |                    | 2455                                   | 15 | 2478                                   | 15 | 2436                                    | 23 |  |  |
| 28b                                                                                          | r (osc)             | M                    | 2B                 | 42.7       | 48.9        | 30.6        | 1.14         | 11767                                        | 0.16               | 0.1603                                  | 0.87 | 10.64                                  | 1.34 | 0.4846                                 | 0.9958 | 0.74 | 4.9              | 0.6                | 2492                                   | 13 | 2547                                   | 21 | 2448                                    | 15 |  |  |
| 9b                                                                                           | c2                  | B                    | 7B                 | 27.0       | 15.4        | 17.1        | 0.57         | 4461                                         | 0.42               | 0.1625                                  | 1.96 | 10.73                                  | 2.30 | 0.4872                                 | 0.9222 | 0.40 | 5.3              |                    | 2500                                   | 22 | 2559                                   | 20 | 2452                                    | 35 |  |  |
| 26a                                                                                          | c2                  | M                    | 4A                 | 30.2       | 14.3        | 19.0        | 0.47         | 14813                                        | 0.13               | 0.1606                                  | 0.99 | 10.70                                  | 1.40 | 0.4856                                 | 0.9629 | 0.69 | 4.9              | 0.1                | 2497                                   | 13 | 2552                                   | 20 | 2453                                    | 17 |  |  |
| 81b                                                                                          | r                   | B                    | 5C                 | 17.2       | 15.7        | 11.4        | 0.91         | 8757                                         | 0.21               |                                         |      |                                        |      |                                        |        |      |                  |                    |                                        |    |                                        |    |                                         |    |  |  |

Table S1. SIMS U-Th-Pb data from Lewisian granulites

| Grain/<br>spot # <sup>1</sup> | Growth <sup>2</sup> | CL char <sup>3</sup> | Image <sup>4</sup> | [U]<br>ppm | [Th]<br>ppm | [Pb]<br>ppm | Th/U<br>meas | <sup>206</sup> Pb/ <sup>204</sup> Pb<br>meas | f <sub>206</sub> % <sup>5</sup> | <sup>207</sup> Pb/<br><sup>206</sup> Pb | ±σ    | <sup>207</sup> Pb/<br><sup>235</sup> U | ±σ     | <sup>206</sup> Pb/<br><sup>238</sup> U | ±σ     | ρ    | Disc. %<br>conv. | Disc. %<br>2σ lim. | <sup>207</sup> Pb/<br><sup>235</sup> U | ±σ   | <sup>206</sup> Pb/<br><sup>238</sup> U | ±σ   | <sup>207</sup> Pb/<br><sup>206</sup> Pb | ±σ |
|-------------------------------|---------------------|----------------------|--------------------|------------|-------------|-------------|--------------|----------------------------------------------|---------------------------------|-----------------------------------------|-------|----------------------------------------|--------|----------------------------------------|--------|------|------------------|--------------------|----------------------------------------|------|----------------------------------------|------|-----------------------------------------|----|
| 78                            | sp                  | M                    | 5C                 | 52.4       | 54.3        | 36.3        | 1.04         | 22109                                        | 0.08                            | 0.1630                                  | 0.54  | 10.72                                  | 1.01   | 0.4787                                 | 0.8523 | 0.84 | 2.0              | 2499               | 9                                      | 2522 | 18                                     | 2481 | 9                                       |    |
| 29a                           | r                   | M                    | 2A                 | 52.7       | 51.9        | 35.0        | 0.99         | 17454                                        | 0.11                            | 0.1634                                  | 0.76  | 10.42                                  | 1.23   | 0.4646                                 | 0.9592 | 0.78 | -1.2             | 2473               | 11                                     | 2460 | 20                                     | 2483 | 13                                      |    |
| 75                            | sp                  | B                    | 6C                 | 21.2       | 19.4        | 14.3        | 0.91         | 18607                                        | (0.10)                          | 0.1627                                  | 0.84  | 10.64                                  | 1.10   | 0.4745                                 | 0.7055 | 0.64 | 1.0              | 2492               | 10                                     | 2503 | 15                                     | 2484 | 14                                      |    |
| 17a                           | r                   | B                    | 6B                 | 23.8       | 21.3        | 16.0        | 0.89         | 13718                                        | 0.14                            | 0.1637                                  | 1.11  | 10.66                                  | 1.51   | 0.4752                                 | 0.9794 | 0.65 | 1.1              | 2494               | 14                                     | 2507 | 20                                     | 2484 | 19                                      |    |
| 65a                           | sp                  | M                    | 6D                 | 68.0       | 63.8        | 46.3        | 0.94         | 27138                                        | 0.07                            | 0.1633                                  | 0.47  | 10.73                                  | 0.95   | 0.4778                                 | 0.8252 | 0.86 | 1.6              | 2500               | 9                                      | 2518 | 17                                     | 2485 | 8                                       |    |
| 35b                           | cz                  | B                    | 1A                 | 11.8       | 23.9        | 9.7         | 2.02         | 3990                                         | 0.47                            | 0.1661                                  | 2.19  | 10.81                                  | 2.54   | 0.4815                                 | 1.0343 | 0.41 | 2.3              | 2507               | 24                                     | 2534 | 22                                     | 2486 | 39                                      |    |
| 34                            | sp                  | B                    | 1A                 | 35.3       | 36.3        | 23.8        | 1.03         | 8516                                         | 0.22                            | 0.1644                                  | 1.02  | 10.46                                  | 1.44   | 0.4655                                 | 0.9672 | 0.67 | -1.1             | 2476               | 13                                     | 2464 | 20                                     | 2487 | 18                                      |    |
| 32b                           | r                   | M                    | 1A                 | 40.6       | 37.0        | 26.8        | 0.91         | 22902                                        | (0.08)                          | 0.1634                                  | 1.08  | 10.48                                  | 1.45   | 0.4651                                 | 0.9647 | 0.67 | -1.4             | 2478               | 14                                     | 2462 | 20                                     | 2492 | 18                                      |    |
| 13b                           | r                   | D                    | 7A                 | 105.7      | 105.7       | 72.6        | 1.00         | 41839                                        | 0.04                            | 0.1638                                  | 0.52  | 10.75                                  | 1.10   | 0.4770                                 | 0.9630 | 0.88 | 1.1              | 2502               | 10                                     | 2514 | 20                                     | 2492 | 9                                       |    |
| 83b                           | r                   | M                    | 5B                 | 24.1       | 25.5        | 16.7        | 1.06         | 13932                                        | 0.13                            | 0.1645                                  | 0.81  | 10.75                                  | 1.07   | 0.4764                                 | 0.6639 | 0.62 | 0.9              | 2502               | 10                                     | 2512 | 14                                     | 2493 | 14                                      |    |
| 33c                           | r                   | B                    | 1A                 | 32.1       | 28.0        | 21.3        | 0.87         | 7592                                         | 0.25                            | 0.1654                                  | 1.22  | 10.56                                  | 1.58   | 0.4676                                 | 0.9439 | 0.60 | -1.1             | 2485               | 15                                     | 2473 | 19                                     | 2495 | 21                                      |    |
| 84c                           | c2                  | D                    | 5B                 | 69.2       | 81.1        | 48.1        | 1.17         | 43725                                        | (0.04)                          | 0.1639                                  | 0.59  | 10.52                                  | 0.90   | 0.4655                                 | 0.6875 | 0.76 | -1.6             | 2482               | 8                                      | 2464 | 14                                     | 2496 | 10                                      |    |
| 27b                           | r                   | B                    | 4A                 | 30.5       | 33.9        | 21.2        | 1.11         | 10060                                        | 0.19                            | 0.1652                                  | 1.01  | 10.68                                  | 1.41   | 0.4727                                 | 0.9441 | 0.67 | -0.1             | 2496               | 13                                     | 2495 | 20                                     | 2497 | 18                                      |    |
| 77                            | sp                  | B                    | 6B                 | 14.8       | 11.2        | 9.8         | 0.75         | 21924                                        | (0.09)                          | 0.1642                                  | 1.00  | 10.93                                  | 1.26   | 0.4829                                 | 0.7754 | 0.61 | 2.0              | 2517               | 12                                     | 2540 | 16                                     | 2499 | 17                                      |    |
| 65b                           | sp                  | M                    | 6D                 | 67.1       | 63.3        | 45.6        | 0.94         | (0.00)                                       | 0.1642                          | 0.50                                    | 10.76 | 1.25                                   | 0.4751 | 1.1397                                 | 0.91   | 0.3  | 2502             | 12                 | 2506                                   | 24   | 2500                                   | 8    |                                         |    |
| 47a                           | r/c2                | M                    | 5A                 | 70.7       | 73.5        | 49.2        | 1.04         | 6237                                         | 0.30                            | 0.1664                                  | 0.69  | 10.92                                  | 1.05   | 0.4817                                 | 0.7483 | 0.71 | 1.6              | 2516               | 10                                     | 2535 | 16                                     | 2501 | 12                                      |    |
| 87a (HF-10)                   | c2/r                | M                    | 5A                 | 9.0        | 8.2         | 6.1         | 0.91         | 3983                                         | 0.47                            | 0.1675                                  | 1.36  | 10.83                                  | 1.67   | 0.4777                                 | 0.7391 | 0.44 | 0.8              | 2508               | 16                                     | 2517 | 15                                     | 2501 | 25                                      |    |
| 83a                           | c/sp?               | M                    | 5B                 | 53.3       | 57.6        | 36.6        | 1.08         | 9213                                         | 0.20                            | 0.1657                                  | 0.54  | 10.66                                  | 0.99   | 0.4705                                 | 0.8201 | 0.82 | -0.7             | 2494               | 9                                      | 2486 | 17                                     | 2501 | 9                                       |    |
| 25b                           | c1                  | M                    | 4A                 | 20.7       | 18.3        | 13.7        | 0.88         | 9992                                         | 0.19                            | 0.1657                                  | 1.23  | 10.63                                  | 1.71   | 0.4689                                 | 1.1325 | 0.66 | -2.1             | 2491               | 16                                     | 2479 | 23                                     | 2502 | 21                                      |    |
| 41a                           | c                   | D                    | 2B                 | 179.3      | 158.9       | 122.0       | 0.89         | 13830                                        | 0.14                            | 0.1655                                  | 0.44  | 11.03                                  | 1.04   | 0.4858                                 | 0.9342 | 0.90 | 2.3              | 2525               | 10                                     | 2552 | 20                                     | 2504 | 8                                       |    |
| 33b                           | r                   | B                    | 1A                 | 36.3       | 32.6        | 24.5        | 0.90         | 7831                                         | 0.24                            | 0.1663                                  | 0.89  | 10.86                                  | 1.37   | 0.4780                                 | 0.9680 | 0.70 | 0.7              | 2511               | 13                                     | 2519 | 20                                     | 2505 | 16                                      |    |
| 4                             | sp                  | B                    | 8A                 | 28.2       | 26.9        | 19.0        | 0.95         | 10798                                        | 0.17                            | 0.1661                                  | 1.00  | 10.70                                  | 1.42   | 0.4706                                 | 0.9721 | 0.68 | -1.0             | 2497               | 13                                     | 2486 | 20                                     | 2506 | 17                                      |    |
| 80c                           | r                   | M                    | 5C                 | 63.5       | 61.3        | 45.2        | 0.96         | 33360                                        | 0.06                            | 0.1654                                  | 1.13  | 11.34                                  | 1.73   | 0.4987                                 | 1.3116 | 0.76 | 4.9              | 2552               | 16                                     | 2608 | 28                                     | 2507 | 19                                      |    |
| 84a                           | r                   | M                    | 5B                 | 218.4      | 301.0       | 161.5       | 1.38         | 80930                                        | 0.02                            | 0.1652                                  | 0.27  | 10.86                                  | 0.87   | 0.4771                                 | 0.8233 | 0.95 | 0.3              | 2511               | 8                                      | 2515 | 17                                     | 2508 | 5                                       |    |
| 16 (HF-5)                     | r                   | M                    | 6B                 | 71.4       | 73.9        | 49.6        | 1.04         | 51927                                        | (0.04)                          | 0.1652                                  | 0.64  | 10.88                                  | 1.16   | 0.4776                                 | 0.9723 | 0.84 | 0.4              | 2513               | 11                                     | 2517 | 20                                     | 2510 | 11                                      |    |
| 32a                           | c1                  | M                    | 1A                 | 44.6       | 38.1        | 29.6        | 0.85         | 22719                                        | 0.08                            | 0.1658                                  | 0.81  | 10.84                                  | 1.27   | 0.4757                                 | 0.9631 | 0.76 | -0.1             | 2509               | 12                                     | 2508 | 20                                     | 2510 | 14                                      |    |
| 11 (HF-2)                     | c                   | D                    | 7A                 | 159.8      | 212.7       | 121.8       | 1.33         | 35585                                        | 0.05                            | 0.1656                                  | 0.42  | 11.28                                  | 1.04   | 0.4953                                 | 0.9447 | 0.91 | 4.0              | 2547               | 10                                     | 2593 | 20                                     | 2510 | 7                                       |    |
| 80b                           | c2                  | M                    | 5C                 | 27.7       | 20.5        | 18.0        | 0.74         | 13767                                        | 0.14                            | 0.1662                                  | 0.74  | 10.82                                  | 1.30   | 0.4747                                 | 1.0577 | 0.81 | -0.3             | 2507               | 12                                     | 2504 | 22                                     | 2510 | 13                                      |    |
| 73a                           | cz                  | M                    | 6C                 | 24.7       | 25.2        | 16.9        | 1.02         | 23651                                        | (0.08)                          | 0.1654                                  | 1.07  | 10.72                                  | 1.34   | 0.4703                                 | 0.8106 | 0.60 | -1.3             | 2500               | 13                                     | 2485 | 17                                     | 2511 | 18                                      |    |
| 35a                           | r                   | B                    | 1A                 | 18.5       | 15.3        | 12.1        | 0.83         | 12959                                        | (0.14)                          | 0.1656                                  | 1.28  | 10.69                                  | 1.62   | 0.4683                                 | 0.9938 | 0.61 | -1.8             | 2497               | 15                                     | 2476 | 20                                     | 2514 | 21                                      |    |
| 66b                           | r                   | M                    | 6D                 | 40.4       | 43.4        | 27.4        | 1.08         | 51187                                        | (0.04)                          | 0.1657                                  | 0.78  | 10.48                                  | 1.30   | 0.4586                                 | 1.0359 | 0.80 | -3.9             | 2478               | 12                                     | 2433 | 21                                     | 2514 | 13                                      |    |
| 63c                           | c2                  | D                    | 7B                 | 84.9       | 138.6       | 66.2        | 1.63         | 105997                                       | (0.02)                          | 0.1658                                  | 0.43  | 10.96                                  | 1.04   | 0.4792                                 | 0.9434 | 0.91 | 0.4              | 2519               | 10                                     | 2524 | 20                                     | 2516 | 7                                       |    |
| 25a                           | c2                  | D                    | 4A                 | 151.6      | 170.0       | 105.4       | 1.12         | 42341                                        | 0.04                            | 0.1663                                  | 0.65  | 10.79                                  | 1.16   | 0.4715                                 | 0.9582 | 0.83 | -1.3             | 2505               | 11                                     | 2490 | 20                                     | 2517 | 11                                      |    |
| 63b                           | r embays            | B                    | 7B                 | 13.6       | 11.4        | 9.1         | 0.83         | 20499                                        | (0.09)                          | 0.1661                                  | 1.07  | 10.96                                  | 1.30   | 0.4786                                 | 0.7353 | 0.57 | 0.1              | 2520               | 12                                     | 2521 | 15                                     | 2518 | 18                                      |    |
| 31b                           | r                   | B                    | 2B                 | 21.6       | 19.8        | 14.5        | 0.91         | 12302                                        | (0.15)                          | 0.1666                                  | 1.18  | 10.84                                  | 1.54   | 0.4719                                 | 0.9863 | 0.64 | -1.5             | 2509               | 14                                     | 2492 | 20                                     | 2524 | 20                                      |    |
| 73b                           | r                   | M                    | 6C                 | 27.0       | 27.5        | 18.9        | 1.02         | 16758                                        | (0.11)                          | 0.1666                                  | 0.78  | 11.06                                  | 1.13   | 0.4813                                 | 0.8166 | 0.73 | 0.4              | 2528               | 11                                     | 2533 | 17                                     | 2524 | 13                                      |    |
| 24b                           | c                   | M                    | 4A                 | 80.7       | 31.3        | 49.6        | 0.39         | 56104                                        | (0.03)                          | 0.1667                                  | 0.44  | 11.08                                  | 0.83   | 0.4819                                 | 0.7091 | 0.85 | 0.5              | 2530               | 8                                      | 2536 | 15                                     | 2525 | 7                                       |    |
| 30b                           | r/c2                | M                    | 2B                 | 38.1       | 35.2        | 25.4        | 0.92         | 6842                                         | 0.27                            | 0.1690                                  | 0.88  | 10.83                                  | 1.34   | 0.4700                                 | 0.9697 | 0.72 | -2.2             | 2509               | 13                                     | 2484 | 20                                     | 2529 | 16                                      |    |
| 5b                            | c1/c2 mix           | M/D                  | 8A                 | 109.3      | 113.2       | 77.4        | 1.04         | 15524                                        | 0.12                            | 0.1682                                  | 0.63  | 11.22                                  | 1.23   | 0.4862                                 | 1.0529 | 0.85 | 1.1              | 2541               | 12                                     | 2554 | 22                                     | 2531 | 11                                      |    |
| 6b                            | r                   | D                    | 8B                 | 182.8      | 210.1       | 126.8       | 1.15         | 12738                                        | 0.15                            | 0.1685                                  | 0.69  | 10.85                                  | 1.22   | 0.4696                                 | 1.0013 | 0.82 | -2.4             | 2510               | 11                                     | 2482 | 21                                     | 2533 | 12                                      |    |
| 5a                            | c1                  | M                    | 8A                 | 31.4       | 23.3        | 19.8        | 0.74         | 6875                                         | 0.27                            | 0.1698                                  | 1.16  | 10.64                                  | 1.55   | 0.4596                                 | 0.9672 | 0.62 | -4.7             | 2493               | 14                                     | 2438 | 20                                     | 2537 | 20                                      |    |
| 62a                           | c                   | D                    | 7B (partial)       | 168.9      | 219.1       | 122.0       | 1.30         | 6258                                         | 0.30                            | 0.1702                                  | 0.73  | 11.24                                  | 1.20   | 0.4844                                 | 0.9225 | 0.77 | 0.3              | 2543               | 11                                     | 2547 | 19                                     | 2540 | 13                                      |    |
| 19b                           | c1                  | M                    | 5B                 | 39.1       | 49.5        | 28.4        | 1.27         | 12086                                        | 0.15                            | 0.1693                                  | 0.94  | 11.02                                  | 1.41   | 0.4750                                 | 1.0289 | 0.73 | -1.6             | 2525               | 13                                     | 2505 | 21                                     | 2540 | 16                                      |    |
| 48b                           | c2                  | M                    | 6A                 | 27.4       | 46.5        | 22.1        | 1.70         | 10618                                        | 0.18                            | 0.1695                                  | 1.55  | 11.47                                  | 1.93   | 0.4942                                 | 1.1325 | 0.59 | 2.3              | 2562               | 18                                     | 2589 | 24                                     | 2541 | 26                                      |    |
| 66a                           | c                   | M                    | 6D                 | 25.1       | 31.1        | 18.1        | 1.24         | 32910                                        | (0.06)                          | 0.1692                                  | 0.79  | 11.10                                  | 1.14   | 0.4760                                 | 0.8316 | 0.73 | -1.9             | 2532               | 11                                     | 2510 | 17                                     | 2549 | 13                                      |    |
| 55b                           | r                   | D                    | 7A                 | 131.9      | 134.4       | 95.7        | 1.02         | 34433                                        | 0.05                            | 0.1696                                  | 0.78  | 11.70                                  | 1.14   | 0.5017                                 | 0.8264 | 0.73 | 3.4              | 2581               | 11                                     | 2621 | 18                                     | 2550 | 13                                      |    |
| 22b                           | c1                  | D                    | 5A                 | 89.8       | 71.9        | 60.8        | 0.80         | 33669                                        | 0.06                            | 0.1711                                  | 1.00  | 11.43                                  | 1.39   | 0.4855                                 | 0.9518 | 0.69 | 1.7              | 2559               | 13                                     | 2551 | 20                                     | 2565 | 17                                      |    |
| 29c                           | c2                  | M                    | 2B                 | 34.4       | 37.8        | 25.1        | 1.10         | 7443                                         | 0.25                            | 0.1729                                  | 0.90  | 11.75                                  | 1.45   | 0.4979                                 | 1.1105 | 0.79 | 0.8              | 2585               | 14                                     | 2605 | 24                                     | 2569 | 16                                      |    |
| 33a                           | cz                  | M                    | 1A                 | 57.6       | 30.1        | 37.4        | 0.52         | 72137                                        | (0.03)                          | 0.1713                                  | 1.28  | 11.66                                  | 1.59   | 0.4938                                 | 0.9410 | 0.59 | 0.8              | 2578               | 15                                     | 2587 | 20                                     | 2571 | 21                                      |    |
| 76                            | cz                  | M                    | 6B                 | 32.9       | 40.6        | 24.8        | 1.23         | 101739                                       | (0.02)                          | 0.1725                                  | 1.00  | 11.80                                  | 1.26   | 0.4962                                 | 0.7728 | 0.61 | 0.7              | 2589               | 12                                     | 2597 | 17                                     | 2582 | 17                                      |    |
| 27a                           | cz                  | B                    | 4A                 | 14.7       | 56.5        | 15.5        | 3.84         | 3925                                         | 0.48                            | 0.1758                                  | 1.38  | 11.33                                  | 1.84   | 0.4762                                 | 0.9799 | 0.53 | -3.4             | 2551               | 17                                     | 2511 | 20                                     | 2583 | 26                                      |    |
| 55x                           | cz                  | M                    | 7A                 | 14.9       | 15.8        | 11.0        | 1.06         | 1995                                         | 0.94                            | 0.1791                                  | 1.44  | 12.32                                  | 1.84   | 0.5170                                 | 0.8178 | 0.44 | 4.8              | 2629               | 17                                     | 2686 | 18                                     | 2586 | 27                                      |    |
| 5c                            | c2                  | D                    | 8A                 | 149.0      | 155.3       | 105.1       | 1.04         | 11742                                        | 0.16                            | 0.1742                                  | 1.30  | 11.58                                  | 1.61   | 0.4851                                 | 0.9241 | 0.57 | -1.8             | 2571               | 15                                     | 2550 | 19                                     | 2589 | 22                                      |    |
| 3a                            | c                   | D                    | 8A                 | 167.1      | 191.0       | 124.9       | 1.14         | 31865                                        | 0.06                            | 0.1737                                  | 0.95  | 11.98                                  | 1.37   | 0.5014                                 | 0.9829 | 0.72 | 1.4              | 2603               | 13                                     | 2620 | 21                                     | 2590 | 16                                      |    |
| 81a                           | c                   | D                    | 5C                 | 198.0      | 151.2       | 133.8       | 0.76         | 26698                                        | 0.07                            | 0.1741                                  | 0.32  | 11.70                                  | 0.98   | 0.4886                                 | 0.9316 | 0.95 | -1.3             | 2581               | 9                                      | 2565 | 20                                     | 2593 | 5                                       |    |
| 10a                           | c                   | B                    | 7B                 | 20.5       | 10.3        | 13.5        | 0.50         | 5619                                         | 0.33                            | 0.1770                                  | 1.12  | 12.18                                  | 1.64   | 0.5054                                 | 1.1291 | 0.69 | 1.5              | 2618               | 15                                     | 2637 | 24                                     | 2604 | 20                                      |    |
| 30a                           | r/c2                | M                    | 2B                 | 12.4       |             |             |              |                                              |                                 |                                         |       |                                        |        |                                        |        |      |                  |                    |                                        |      |                                        |      |                                         |    |

Table S1. SIMS U-Th-Pb data from Lewisian granulites

| Grain/<br>spot # <sup>1</sup> | Growth <sup>2</sup> | CL char <sup>3</sup> | Image <sup>4</sup> | [U]<br>ppm | [Th]<br>ppm | [Pb]<br>ppm | Th/U<br>meas | <sup>206</sup> Pb/ <sup>204</sup> Pb<br>meas | f <sub>206</sub> % <sup>5</sup> | <sup>207</sup> Pb/<br><sup>206</sup> Pb | ±σ   | <sup>207</sup> Pb/<br><sup>235</sup> U | ±σ   | <sup>206</sup> Pb/<br><sup>238</sup> U | ±σ     | ρ    | Disc. %<br>conv. | Disc. %<br>2σ lim. | <sup>207</sup> Pb/<br><sup>235</sup> U | ±σ | <sup>206</sup> Pb/<br><sup>238</sup> U | ±σ | <sup>207</sup> Pb/<br><sup>206</sup> Pb | ±σ |
|-------------------------------|---------------------|----------------------|--------------------|------------|-------------|-------------|--------------|----------------------------------------------|---------------------------------|-----------------------------------------|------|----------------------------------------|------|----------------------------------------|--------|------|------------------|--------------------|----------------------------------------|----|----------------------------------------|----|-----------------------------------------|----|
| 17b (HF-4)                    | cz                  | M                    | 6B                 | 137.4      | 105.7       | 99.2        | 0.77         | 16184                                        | 0.12                            | 0.1805                                  | 0.69 | 12.88                                  | 1.22 | 0.5196                                 | 1.0059 | 0.82 | 2.2              |                    | 2671                                   | 12 | 2698                                   | 22 | 2650                                    | 11 |
| 58                            | c                   | D                    | 8B                 | 131.4      | 129.4       | 97.0        | 0.98         | 33595                                        | 0.06                            | 0.1806                                  | 1.25 | 12.72                                  | 1.95 | 0.5117                                 | 1.4982 | 0.77 | 0.4              |                    | 2659                                   | 19 | 2664                                   | 33 | 2655                                    | 21 |
| 23                            | c                   | M                    | 5A                 | 43.3       | 43.3        | 31.7        | 1.00         | 19483                                        | 0.10                            | 0.1810                                  | 2.04 | 12.55                                  | 2.30 | 0.5047                                 | 1.0166 | 0.44 | -1.0             |                    | 2646                                   | 22 | 2634                                   | 22 | 2656                                    | 34 |
| 21                            | c                   | M                    | 5A                 | 29.4       | 39.3        | 23.3        | 1.34         | 4305                                         | 0.43                            | 0.1839                                  | 1.33 | 12.74                                  | 1.71 | 0.5103                                 | 0.9408 | 0.55 | -0.2             |                    | 2661                                   | 16 | 2658                                   | 21 | 2663                                    | 23 |
| 48x                           | c1                  | D                    | 6A                 | 146.0      | 16.6        | 91.4        | 0.11         | 20411                                        | 0.09                            | 0.1819                                  | 0.44 | 12.85                                  | 0.87 | 0.5140                                 | 0.7411 | 0.85 | 0.4              |                    | 2669                                   | 8  | 2674                                   | 16 | 2665                                    | 7  |
| 57x                           | c                   | D                    | 7B                 | 291.2      | 134.5       | 196.4       | 0.46         | 8978                                         | 0.21                            | 0.1850                                  | 0.59 | 13.03                                  | 0.96 | 0.5146                                 | 0.7501 | 0.78 | -0.4             |                    | 2682                                   | 9  | 2676                                   | 16 | 2686                                    | 10 |
| 29b                           | c1                  | D                    | 2B                 | 158.3      | 213.8       | 129.0       | 1.35         | 52560                                        | 0.04                            | 0.1847                                  | 0.88 | 13.34                                  | 1.29 | 0.5245                                 | 0.9481 | 0.73 | 1.1              |                    | 2704                                   | 12 | 2718                                   | 21 | 2694                                    | 14 |
| 28a (HF-7b)                   | c                   | M                    | 2B                 | 27.2       | 39.2        | 21.8        | 1.44         | 9444                                         | 0.20                            | 0.1865                                  | 1.52 | 12.97                                  | 1.82 | 0.5078                                 | 0.9424 | 0.52 | -2.4             |                    | 2677                                   | 17 | 2647                                   | 20 | 2700                                    | 25 |
| 44b                           | c2                  | B                    | 5A                 | 16.6       | 14.1        | 11.1        | 0.85         | 841                                          | 2.22                            | 0.1998                                  | 3.08 | 12.46                                  | 3.87 | 0.4873                                 | 1.0375 | 0.27 | -6.4             |                    | 2639                                   | 37 | 2559                                   | 22 | 2702                                    | 60 |
| 69a                           | r (c2?)             | M                    | 6D                 | 27.1       | 23.4        | 20.1        | 0.87         | 26888                                        | {0.07}                          | 0.1868                                  | 0.83 | 13.40                                  | 1.08 | 0.5202                                 | 0.6838 | 0.64 | -0.6             |                    | 2708                                   | 10 | 2700                                   | 15 | 2714                                    | 14 |
| 12b                           | c2                  | D                    | 7B                 | 156.9      | 134.6       | 114.8       | 0.86         | 36863                                        | 0.05                            | 0.1874                                  | 0.58 | 13.23                                  | 1.14 | 0.5129                                 | 0.9788 | 0.86 | -2.1             |                    | 2696                                   | 11 | 2669                                   | 21 | 2717                                    | 10 |
| 60a                           | c1                  | D                    | 8B                 | 420.7      | 286.3       | 296.1       | 0.68         | 17982                                        | 0.10                            | 0.1884                                  | 0.90 | 13.18                                  | 1.30 | 0.5093                                 | 0.9323 | 0.72 | -3.1             |                    | 2693                                   | 12 | 2654                                   | 20 | 2722                                    | 15 |
| 50x                           | c1                  | D                    | 6A                 | 170.0      | 123.6       | 125.7       | 0.73         | 12734                                        | 0.15                            | 0.1901                                  | 1.05 | 13.85                                  | 1.36 | 0.5311                                 | 0.8499 | 0.63 | 0.5              |                    | 2739                                   | 13 | 2746                                   | 19 | 2734                                    | 17 |
| 86                            | c                   | D                    | 4A                 | 89.5       | 60.3        | 64.2        | 0.67         | 34049                                        | 0.05                            | 0.1895                                  | 1.00 | 13.65                                  | 1.32 | 0.5234                                 | 0.8486 | 0.64 | -1.0             |                    | 2726                                   | 13 | 2713                                   | 19 | 2735                                    | 16 |
| 7                             | c1, z               | M                    | 8A                 | 59.9       | 24.9        | 41.9        | 0.42         | 81162                                        | {0.02}                          | 0.1905                                  | 1.09 | 14.05                                  | 1.44 | 0.5347                                 | 0.9417 | 0.65 | 0.7              |                    | 2753                                   | 14 | 2761                                   | 21 | 2747                                    | 18 |
| 13a                           | cz                  | M                    | 7A                 | 30.9       | 15.3        | 22.0        | 0.49         | 7646                                         | 0.24                            | 0.1929                                  | 0.90 | 14.04                                  | 1.35 | 0.5321                                 | 0.9882 | 0.72 | -0.1             |                    | 2752                                   | 13 | 2750                                   | 22 | 2753                                    | 15 |
| 63a                           | c1,z                | D                    | 7B                 | 102.1      | 21.6        | 66.7        | 0.21         | 81427                                        | {0.02}                          | 0.1918                                  | 2.10 | 13.68                                  | 2.73 | 0.5171                                 | 1.7456 | 0.64 | -3.1             |                    | 2728                                   | 26 | 2687                                   | 38 | 2758                                    | 34 |
| 71b                           | c2,z                | M                    | 6D                 | 61.2       | 39.5        | 44.0        | 0.64         | 31813                                        | 0.06                            | 0.1923                                  | 0.57 | 13.96                                  | 0.96 | 0.5275                                 | 0.7726 | 0.80 | -1.2             |                    | 2747                                   | 9  | 2731                                   | 17 | 2758                                    | 9  |
| 79                            | cz                  | M                    | 5C                 | 24.3       | 12.4        | 17.7        | 0.51         | 13536                                        | 0.14                            | 0.1929                                  | 0.97 | 14.51                                  | 1.19 | 0.5478                                 | 0.6637 | 0.56 | 2.5              |                    | 2783                                   | 11 | 2816                                   | 15 | 2760                                    | 16 |
| 85                            | cz                  | M                    | 5B                 | 27.8       | 58.9        | 25.8        | 2.11         | 5396                                         | 0.35                            | 0.1944                                  | 0.90 | 13.98                                  | 1.25 | 0.5276                                 | 0.8354 | 0.67 | -1.3             |                    | 2749                                   | 12 | 2731                                   | 19 | 2761                                    | 15 |
| 36a                           | cz                  | B                    | 1A                 | 49.5       | 50.5        | 36.3        | 1.02         | 7802                                         | 0.24                            | 0.1937                                  | 0.96 | 13.46                                  | 1.46 | 0.5081                                 | 1.0739 | 0.74 | -5.0             | -0.6               | 2713                                   | 14 | 2648                                   | 23 | 2761                                    | 16 |
| 9                             | c (mix?)            | D                    | 7B                 | 22.7       | 13.4        | 15.8        | 0.59         | 3253                                         | 0.57                            | 0.1962                                  | 0.99 | 13.63                                  | 1.70 | 0.5136                                 | 1.2954 | 0.76 | -4.0             |                    | 2724                                   | 16 | 2672                                   | 28 | 2764                                    | 18 |
| 30c (HF-6)                    | c                   | D                    | 2B                 | 78.8       | 78.9        | 63.5        | 1.00         | 62054                                        | {0.03}                          | 0.1942                                  | 1.09 | 15.03                                  | 1.55 | 0.5614                                 | 1.0995 | 0.71 | 4.2              |                    | 2817                                   | 15 | 2872                                   | 26 | 2778                                    | 18 |
| 16b                           | cz                  | D                    | 6B                 | 340.9      | 175.7       | 251.5       | 0.52         | 45800                                        | 0.04                            | 0.1944                                  | 0.68 | 14.76                                  | 1.12 | 0.5513                                 | 0.8920 | 0.80 | 2.3              |                    | 2800                                   | 11 | 2822                                   | 20 | 2778                                    | 11 |
| 38c                           | c3                  | M                    | 1A                 | 62.4       | 37.3        | 42.8        | 0.60         | 6416                                         | 0.29                            | 0.1961                                  | 1.77 | 13.52                                  | 1.98 | 0.5050                                 | 0.8351 | 0.42 | -6.3             |                    | 2717                                   | 19 | 2635                                   | 18 | 2778                                    | 29 |
| 51x                           | c                   | M                    | 6A                 | 20.5       | 10.4        | 15.3        | 0.51         | 2135                                         | 0.88                            | 0.1999                                  | 2.33 | 15.09                                  | 2.60 | 0.5632                                 | 0.8590 | 0.33 | 4.5              |                    | 2821                                   | 25 | 2880                                   | 20 | 2779                                    | 40 |
| 12a                           | c1                  | D                    | 7B                 | 188.9      | 137.8       | 142.9       | 0.73         | 24646                                        | 0.08                            | 0.1958                                  | 0.35 | 14.58                                  | 1.04 | 0.5416                                 | 0.9751 | 0.94 | 0.1              |                    | 2788                                   | 10 | 2790                                   | 22 | 2787                                    | 6  |
| 53x                           | c                   | D                    | 8A                 | 164.6      | 166.5       | 130.4       | 1.01         | 27128                                        | 0.07                            | 0.1959                                  | 0.40 | 14.49                                  | 0.87 | 0.5376                                 | 0.7694 | 0.89 | -0.7             |                    | 2782                                   | 8  | 2773                                   | 17 | 2789                                    | 7  |
| 38b                           | c2                  | M                    | 1A                 | 27.0       | 6.3         | 18.0        | 0.23         | 3060                                         | 0.61                            | 0.2000                                  | 1.30 | 14.45                                  | 1.60 | 0.5342                                 | 0.7878 | 0.49 | -1.5             |                    | 2779                                   | 15 | 2759                                   | 18 | 2794                                    | 23 |
| 1 (HF-1)                      | c                   | D                    | 8B                 | 189.9      | 74.9        | 136.4       | 0.39         | 113342                                       | 0.02                            | 0.1963                                  | 0.99 | 15.08                                  | 1.44 | 0.5575                                 | 1.0445 | 0.73 | 2.7              |                    | 2820                                   | 14 | 2856                                   | 24 | 2795                                    | 16 |
| 56b                           | c2,z                | M                    | 7A                 | 18.0       | 15.4        | 15.3        | 0.85         | 18539                                        | {0.10}                          | 0.1969                                  | 2.32 | 16.04                                  | 2.52 | 0.5910                                 | 0.9862 | 0.39 | 8.6              |                    | 2879                                   | 24 | 2993                                   | 24 | 2801                                    | 37 |
| 26b                           | c1                  | M                    | 4A                 | 29.2       | 33.0        | 24.3        | 1.13         | 43748                                        | {0.04}                          | 0.1972                                  | 1.60 | 15.12                                  | 1.88 | 0.5561                                 | 0.9806 | 0.52 | 2.1              |                    | 2823                                   | 18 | 2850                                   | 23 | 2803                                    | 26 |
| 64a                           | c1                  | D                    | 7A                 | 122.2      | 151.3       | 102.7       | 1.24         | 13796                                        | 0.14                            | 0.1983                                  | 0.66 | 14.96                                  | 1.11 | 0.5496                                 | 0.8902 | 0.80 | 0.8              |                    | 2813                                   | 11 | 2823                                   | 20 | 2805                                    | 11 |
| 18                            | cz                  | M                    | 5B                 | 26.1       | 32.5        | 22.2        | 1.25         | 13384                                        | 0.14                            | 0.1993                                  | 1.97 | 15.20                                  | 2.22 | 0.5558                                 | 0.9852 | 0.44 | 1.6              |                    | 2828                                   | 21 | 2849                                   | 23 | 2813                                    | 32 |
| 70                            | c                   | M                    | 6D                 | 28.3       | 36.1        | 24.9        | 1.28         | 29621                                        | {0.06}                          | 0.2002                                  | 0.63 | 15.67                                  | 1.05 | 0.5676                                 | 0.8367 | 0.80 | 3.1              | 0.0                | 2857                                   | 10 | 2898                                   | 20 | 2828                                    | 10 |
| 45b                           | c                   | D                    | 5A                 | 125.9      | 37.7        | 90.6        | 0.30         | 23114                                        | 0.08                            | 0.2016                                  | 0.88 | 15.57                                  | 1.19 | 0.5616                                 | 0.7963 | 0.67 | 1.7              |                    | 2851                                   | 11 | 2873                                   | 18 | 2835                                    | 14 |
| 15 (HF-9)                     | c                   | M                    | 6B                 | 45.1       | 58.6        | 40.3        | 1.30         | 15193                                        | 0.12                            | 0.2023                                  | 1.04 | 15.96                                  | 1.42 | 0.5744                                 | 0.9482 | 0.67 | 3.8              |                    | 2874                                   | 14 | 2926                                   | 22 | 2839                                    | 17 |
| 69b                           | cz                  | M                    | 6D                 | 97.5       | 93.1        | 83.8        | 0.96         | 38875                                        | 0.05                            | 0.2020                                  | 1.41 | 16.31                                  | 1.67 | 0.5864                                 | 0.8890 | 0.53 | 5.9              |                    | 2895                                   | 16 | 2975                                   | 21 | 2840                                    | 23 |
| 74                            | cz                  | B                    | 6C                 | 20.0       | 25.0        | 17.5        | 1.25         | 15195                                        | 0.12                            | 0.2027                                  | 1.90 | 15.85                                  | 2.08 | 0.5692                                 | 0.8106 | 0.39 | 2.8              |                    | 2868                                   | 20 | 2905                                   | 19 | 2842                                    | 31 |
| 14b (HF-3)                    | sp                  | D                    | 6C                 | 72.6       | 87.6        | 60.7        | 1.21         | 46422                                        | 0.04                            | 0.2023                                  | 0.79 | 15.20                                  | 1.07 | 0.5457                                 | 0.7243 | 0.68 | -1.5             |                    | 2828                                   | 10 | 2807                                   | 17 | 2842                                    | 13 |
| 67b                           | c2,z                | M                    | 6D                 | 56.5       | 88.7        | 51.4        | 1.57         | 29707                                        | 0.06                            | 0.2026                                  | 1.16 | 15.49                                  | 1.40 | 0.5557                                 | 0.7775 | 0.55 | 0.2              |                    | 2846                                   | 13 | 2849                                   | 18 | 2844                                    | 19 |
| 43b                           | c2,osc              | M                    | 4A                 | 324.5      | 5.3         | 219.3       | 0.02         | 24664                                        | 0.08                            | 0.2035                                  | 0.42 | 15.68                                  | 0.89 | 0.5603                                 | 0.7848 | 0.88 | 0.7              |                    | 2858                                   | 9  | 2868                                   | 18 | 2851                                    | 7  |
| 64b                           | c2                  | D                    | 7A                 | 142.4      | 68.6        | 106.9       | 0.48         | 34344                                        | 0.05                            | 0.2036                                  | 0.81 | 15.70                                  | 1.06 | 0.5604                                 | 0.6757 | 0.64 | 0.7              |                    | 2859                                   | 10 | 2868                                   | 16 | 2852                                    | 13 |
| 47b                           | c1                  | M                    | 5A                 | 87.4       | 83.6        | 71.7        | 0.96         | 35113                                        | 0.05                            | 0.2049                                  | 0.96 | 15.85                                  | 1.26 | 0.5618                                 | 0.8115 | 0.64 | 0.5              |                    | 2868                                   | 12 | 2874                                   | 19 | 2863                                    | 16 |
| 82b                           | cz                  | D                    | 5C                 | 129.4      | 51.9        | 96.5        | 0.40         | 79425                                        | 0.02                            | 0.2080                                  | 0.73 | 16.27                                  | 1.01 | 0.5677                                 | 0.6994 | 0.69 | 0.4              |                    | 2893                                   | 10 | 2899                                   | 16 | 2889                                    | 12 |
| 49x (HF)                      | c1                  | M                    | 6A                 | 44.1       | 54.7        | 40.5        | 1.24         | 8308                                         | 0.23                            | 0.2104                                  | 0.83 | 17.25                                  | 1.14 | 0.5986                                 | 0.7490 | 0.66 | 5.5              | 1.7                | 2949                                   | 11 | 3024                                   | 18 | 2898                                    | 14 |
| 84b (HF)                      | c1                  | B                    | 5B                 | 24.9       | 36.7        | 23.2        | 1.47         | 4493                                         | 0.42                            | 0.2157                                  | 2.00 | 17.15                                  | 2.17 | 0.5837                                 | 0.7298 | 0.34 | 1.5              |                    | 2943                                   | 21 | 2964                                   | 17 | 2929                                    | 33 |
| 43a                           | c1,osc              | M                    | 4A                 | 107.3      | 50.4        | 84.5        | 0.47         | 21215                                        | 0.09                            | 0.2154                                  | 1.01 | 17.40                                  | 1.27 | 0.5874                                 | 0.7502 | 0.59 | 1.5              |                    | 2957                                   | 12 | 2979                                   | 18 | 2942                                    | 16 |
| 38a                           | c1                  | M                    | 1A                 | 40.5       | 11.4        | 28.9        | 0.28         | 2905                                         | 0.64                            | 0.2192                                  | 1.47 | 16.54                                  | 1.71 | 0.5576                                 | 0.7409 | 0.43 | -3.7             |                    | 2909                                   | 17 | 2857                                   | 17 | 2945                                    | 25 |
| 61 (HF)                       | cz                  | M                    | 8A                 | 29.8       | 25.5        | 25.5        | 0.86         | 6470                                         | 0.29                            | 0.2198                                  | 2.03 | 17.89                                  | 2.28 | 0.5950                                 | 0.9380 | 0.41 | 1.8              |                    | 2984                                   | 22 | 3010                                   | 23 | 2966                                    | 33 |
| 31a (HF-8)                    | cz                  | M                    | 2B                 | 54.9       | 40.0        | 46.5        | 0.73         | 46591                                        | {0.04}                          | 0.2195                                  | 1.66 | 18.13                                  | 1.92 | 0.5988                                 | 0.9522 | 0.50 | 2.0              |                    | 2996                                   | 19 | 3025                                   | 23 | 2977                                    | 27 |
| 72a (HF)                      | c1                  | M                    | 6D                 | 17.4       | 2.9         | 13.2        | 0.17         | 120767                                       | {0.02}                          | 0.2216                                  | 1.61 | 18.31                                  | 1.96 | 0.5992                                 | 1.1204 | 0.57 | 1.4              |                    | 3006                                   | 19 | 3027                                   | 27 | 2992                                    | 26 |
| 24 (HF)                       | cz                  | D                    | 4A                 | 112.8      | 41.3        | 94.8        | 0.37         | 40620                                        | 0.05                            | 0.2274                                  | 0.71 | 19.88                                  | 1.19 | 0.6349                                 | 0.9503 | 0.80 | 5.7              | 2.3                | 3086                                   | 12 | 3169                                   | 24 | 3032                                    | 11 |
| 71a (HF)                      | c1,z                | M                    | 6D                 | 67.1       | 20.0        | 53.8        | 0.30         | 36910                                        | 0.05                            | 0.2291                                  | 0.86 | 19.30                                  | 1.16 | 0.6118                                 | 0.7776 | 0.67 | 1.4              |                    | 3057                                   | 11 | 3077                                   | 19 | 3043                                    | 14 |

## Notes

<sup>1</sup> Text in parentheses indicates grains for which in situ Hf isotope measurements have been made (see Table S2); where this is accompanied by a number, this refers to concurrent Pb and Hf analysis numbering.

<sup>2</sup> Growth
